# Supplementary material for: Comprehensive bioinformatics analysis and experimental validation revealed that high-expression ARHGAP9 affected the progression of gastric cancer
Source: Research Square preprint supplement (doi:10.21203/rs.3.rs-7311091/v1), 2025-12-05
Supplement: Supplementary file 1 [file 082b72e76c0e8e300b752cee.xlsx]

## Sheet: Sheet1
id	correlation_pearson皮尔逊相关性	pvalue_pearson	padj_pearson	correlation_spearman斯皮尔曼相关	pvalue_spearman	padj_spearman	gene_name	gene_type
ENSG00000123329.20	1	0	0	1	0	0	ARHGAP9	protein_coding
ENSG00000105122.13	0.937264	8.72518e-173	2.53981e-168	0.934005	0	0	RASAL3	protein_coding
ENSG00000009790.15	0.925267	4.1356e-159	4.01277e-155	0.933681	1.95609e-168	1.61302e-166	TRAF3IP3	protein_coding
ENSG00000122122.10	0.929362	1.67205e-163	2.43359e-159	0.93134	0	0	SASH3	protein_coding
ENSG00000015285.11	0.916209	3.20162e-150	2.07102e-146	0.931213	1.409e-165	1.16024e-163	WAS	protein_coding
ENSG00000005844.19	0.931139	1.71147e-165	3.32129e-161	0.93037	0	0	ITGAL	protein_coding
ENSG00000110934.13	0.926051	6.23547e-160	7.26034e-156	0.927359	2.53889e-161	2.0877e-159	BIN2	protein_coding
ENSG00000136286.16	0.909429	3.33709e-144	1.38771e-140	0.920096	0	0	MYO1G	protein_coding
ENSG00000163219.12	0.912276	1.13719e-146	6.01865e-143	0.917525	0	0	ARHGAP25	protein_coding
ENSG00000185811.19	0.921268	4.70546e-155	3.91347e-151	0.917311	0	0	IKZF1	protein_coding
ENSG00000175463.12	0.920313	4.07066e-154	2.96232e-150	0.916071	0	0	TBC1D10C	protein_coding
ENSG00000081237.20	0.914987	4.24154e-149	2.46934e-145	0.915254	0	0	PTPRC	protein_coding
ENSG00000180353.11	0.903436	2.89433e-139	9.91189e-136	0.910852	0	0	HCLS1	protein_coding
ENSG00000110324.11	0.895526	3.1981e-133	8.86605e-130	0.910233	6.844e-145	5.6198e-143	IL10RA	protein_coding
ENSG00000164691.18	0.910217	7.05759e-145	3.42399e-141	0.906907	0	0	TAGAP	protein_coding
ENSG00000134516.18	0.902902	7.69123e-139	2.4876e-135	0.906643	7.25741e-142	5.95087e-140	DOCK2	protein_coding
ENSG00000186517.14	0.910113	8.67315e-145	3.8841e-141	0.904741	2.59605e-140	2.1257e-138	ARHGAP30	protein_coding
ENSG00000104814.13	0.89933	4.58247e-136	1.40412e-132	0.904365	5.21702e-140	4.2658e-138	MAP4K1	protein_coding
ENSG00000167208.15	0.898636	1.54521e-135	4.49795e-132	0.901268	0	0	SNX20	protein_coding
ENSG00000078589.13	0.903795	1.49641e-139	5.44489e-136	0.898789	0	0	P2RY10	protein_coding
ENSG00000168421.13	0.903931	1.1647e-139	4.52044e-136	0.898385	0	0	RHOH	protein_coding
ENSG00000100055.21	0.8926	4.15204e-131	8.95272e-128	0.894306	0	0	CYTH4	protein_coding
ENSG00000198821.11	0.894561	1.61811e-132	4.09578e-129	0.890402	1.46768e-129	1.19504e-127	CD247	protein_coding
ENSG00000142347.19	0.877673	3.34972e-121	4.5352e-118	0.890036	2.63473e-129	2.1423e-127	MYO1F	protein_coding
ENSG00000123338.13	0.890241	1.89792e-129	3.6831e-126	0.889638	0	0	NCKAP1L	protein_coding
ENSG00000102879.16	0.892062	1.00077e-130	2.08081e-127	0.889515	0	0	CORO1A	protein_coding
ENSG00000117090.15	0.89267	3.70287e-131	8.2913e-128	0.889094	0	0	SLAMF1	protein_coding
ENSG00000113263.13	0.879946	1.26639e-122	1.89042e-119	0.889007	1.35498e-128	1.1002e-126	ITK	protein_coding
ENSG00000117091.10	0.891626	2.0343e-130	4.08389e-127	0.888804	1.86673e-128	1.51361e-126	CD48	protein_coding
ENSG00000143119.14	0.87892	5.60111e-122	7.76394e-119	0.888046	0	0	CD53	protein_coding
ENSG00000167984.18	0.894249	2.72377e-132	6.60719e-129	0.88788	7.98229e-128	6.46333e-126	NLRC3	protein_coding
ENSG00000110031.13	0.856255	4.72733e-109	3.87628e-106	0.886597	0	0	LPXN	protein_coding
ENSG00000172349.17	0.892761	3.19273e-131	7.43498e-128	0.886383	8.18523e-127	6.61844e-125	IL16	protein_coding
ENSG00000185862.7	0.883777	4.35718e-125	7.46077e-122	0.884896	0	0	EVI2B	protein_coding
ENSG00000155926.14	0.872142	7.42892e-118	8.82646e-115	0.884351	0	0	SLA	protein_coding
ENSG00000162739.14	0.895284	4.81472e-133	1.27411e-129	0.88282	0	0	SLAMF6	protein_coding
ENSG00000010671.16	0.884532	1.39002e-125	2.5045e-122	0.881954	0	0	BTK	protein_coding
ENSG00000158517.15	0.878944	5.40887e-122	7.68033e-119	0.881673	1.00661e-123	8.12798e-122	NCF1	protein_coding
ENSG00000072818.12	0.888714	2.1534e-128	4.04408e-125	0.881544	1.21746e-123	9.81689e-122	ACAP1	protein_coding
ENSG00000172578.12	0.87178	1.21474e-117	1.41439e-114	0.877827	0	0	KLHL6	protein_coding
ENSG00000135426.16	0.881041	2.55619e-123	4.02206e-120	0.876367	2.13566e-120	1.71732e-118	TESPA1	protein_coding
ENSG00000180096.12	0.880311	7.44115e-123	1.14002e-119	0.874886	1.70067e-119	1.36565e-117	SEPTIN1	protein_coding
ENSG00000160791.13	0.853142	1.88578e-107	1.3897e-104	0.874723	0	0	CCR5	protein_coding
ENSG00000079263.19	0.877507	4.24427e-121	5.61575e-118	0.872503	4.5423e-118	3.64248e-116	SP140	protein_coding
ENSG00000104894.12	0.882733	2.08486e-124	3.46789e-121	0.871124	0	0	CD37	protein_coding
ENSG00000183918.17	0.869572	2.35737e-116	2.58946e-113	0.871051	3.25406e-117	2.60585e-115	SH2D1A	protein_coding
ENSG00000153283.13	0.869246	3.63704e-116	3.92113e-113	0.870735	4.98032e-117	3.98275e-115	CD96	protein_coding
ENSG00000138964.17	0.872873	2.73851e-118	3.32147e-115	0.870595	0	0	PARVG	protein_coding
ENSG00000116824.5	0.85818	4.63178e-110	4.02467e-107	0.869837	0	0	CD2	protein_coding
ENSG00000160185.15	0.866169	2.0553e-114	2.17555e-111	0.869203	3.85038e-116	3.07491e-114	UBASH3A	protein_coding
ENSG00000103522.16	0.855472	1.20537e-108	9.74644e-106	0.869042	0	0	IL21R	protein_coding
ENSG00000136167.15	0.861061	1.34107e-111	1.3233e-108	0.868844	0	0	LCP1	protein_coding
ENSG00000100385.14	0.863008	1.1691e-112	1.19408e-109	0.868364	0	0	IL2RB	protein_coding
ENSG00000161929.15	0.874374	3.46374e-119	4.48116e-116	0.868284	0	0	SCIMP	protein_coding
ENSG00000163564.15	0.871141	2.88043e-117	3.2881e-114	0.867858	0	0	PYHIN1	protein_coding
ENSG00000082074.19	0.859754	6.75339e-111	6.44539e-108	0.865988	2.5999e-114	2.07344e-112	FYB1	protein_coding
ENSG00000124203.6	0.770123	7.94425e-75	1.94327e-72	0.865419	5.41336e-114	4.31128e-112	ZNF831	protein_coding
ENSG00000143851.15	0.834038	2.24498e-98	1.24474e-95	0.864435	0	0	PTPN7	protein_coding
ENSG00000126882.13	0.873658	9.32754e-119	1.15538e-115	0.864105	0	0	FAM78A	protein_coding
ENSG00000104972.15	0.854322	4.71176e-108	3.56246e-105	0.863852	4.01563e-113	3.19375e-111	LILRB1	protein_coding
ENSG00000184922.14	0.855289	1.49894e-108	1.19542e-105	0.863584	0	0	FMNL1	protein_coding
ENSG00000181847.12	0.869909	1.50542e-116	1.68544e-113	0.863251	0	0	TIGIT	protein_coding
ENSG00000198851.10	0.863814	4.21296e-113	4.37982e-110	0.86322	0	0	CD3E	protein_coding
ENSG00000096996.16	0.851519	1.24688e-106	8.85252e-104	0.862727	1.66649e-112	1.32179e-110	IL12RB1	protein_coding
ENSG00000101082.14	0.854748	2.84824e-108	2.18183e-105	0.862146	0	0	SLA2	protein_coding
ENSG00000075884.14	0.857056	1.80589e-109	1.50193e-106	0.860939	1.56027e-111	1.23586e-109	ARHGAP15	protein_coding
ENSG00000130592.17	0.860791	1.87496e-111	1.81927e-108	0.858998	0	0	LSP1	protein_coding
ENSG00000122224.18	0.85862	2.70915e-110	2.38972e-107	0.858027	5.57695e-110	4.4114e-108	LY9	protein_coding
ENSG00000163519.14	0.858672	2.54266e-110	2.27736e-107	0.856796	2.46862e-109	1.9474e-107	TRAT1	protein_coding
ENSG00000135905.20	0.859715	7.08456e-111	6.6524e-108	0.854876	2.44649e-108	1.92733e-106	DOCK10	protein_coding
ENSG00000141506.14	0.849505	1.25935e-105	8.52518e-103	0.854338	0	0	PIK3R5	protein_coding
ENSG00000146192.15	0.862312	2.80818e-112	2.81873e-109	0.852657	0	0	FGD2	protein_coding
ENSG00000109943.9	0.828716	4.73509e-96	2.43954e-93	0.852645	3.37031e-107	2.65152e-105	CRTAM	protein_coding
ENSG00000167286.10	0.852119	6.22073e-107	4.47109e-104	0.852258	0	0	CD3D	protein_coding
ENSG00000013725.14	0.858697	2.46809e-110	2.24511e-107	0.850846	2.70897e-106	2.12835e-104	CD6	protein_coding
ENSG00000130755.13	0.857803	7.32065e-110	6.26755e-107	0.849977	0	0	GMFG	protein_coding
ENSG00000147443.13	0.837287	7.79213e-100	4.44748e-97	0.849844	0	0	DOK2	protein_coding
ENSG00000198771.11	0.857677	8.52697e-110	7.19454e-107	0.849842	8.56966e-106	6.72384e-104	RCSD1	protein_coding
ENSG00000089012.14	0.85145	1.35055e-106	9.47307e-104	0.848843	0	0	SIRPG	protein_coding
ENSG00000108798.9	0.831217	3.92169e-97	2.11401e-94	0.847716	0	0	ABI3	protein_coding
ENSG00000107099.16	0.855047	1.99819e-108	1.55108e-105	0.847229	0	0	DOCK8	protein_coding
ENSG00000197471.12	0.844169	4.90629e-103	3.17372e-100	0.846752	0	0	SPN	protein_coding
ENSG00000140368.13	0.851059	2.11941e-106	1.45162e-103	0.845997	0	0	PSTPIP1	protein_coding
ENSG00000069493.15	0.858873	1.98932e-110	1.83832e-107	0.845959	6.80208e-104	5.32979e-102	CLEC2D	protein_coding
ENSG00000105851.11	0.837865	4.25339e-100	2.47624e-97	0.845627	0	0	PIK3CG	protein_coding
ENSG00000043462.13	0.828201	7.86952e-96	3.98389e-93	0.845588	0	0	LCP2	protein_coding
ENSG00000181036.14	0.786101	6.08127e-80	1.78808e-77	0.845468	1.17259e-103	9.17554e-102	FCRL6	protein_coding
ENSG00000137078.9	0.851296	1.61254e-106	1.11761e-103	0.845324	1.37516e-103	1.07462e-101	SIT1	protein_coding
ENSG00000283787.2	0.841078	1.40398e-101	8.51424e-99	0.845078	1.80445e-103	1.4082e-101	PRR33	protein_coding
ENSG00000169442.9	0.85392	7.57352e-108	5.65276e-105	0.844941	0	0	CD52	protein_coding
ENSG00000120280.6	0.847195	1.71174e-104	1.13243e-101	0.84449	3.44786e-103	2.68711e-101	CXorf21	protein_coding
ENSG00000160593.19	0.829846	1.54409e-96	8.09854e-94	0.842654	0	0	JAML	protein_coding
ENSG00000160654.11	0.847437	1.30481e-104	8.73145e-102	0.842625	2.64305e-102	2.05713e-100	CD3G	protein_coding
ENSG00000171608.16	0.855203	1.6599e-108	1.30589e-105	0.842608	0	0	PIK3CD	protein_coding
ENSG00000142512.15	0.817877	1.47737e-91	6.37107e-89	0.842586	2.75784e-102	2.1436e-100	SIGLEC10	protein_coding
ENSG00000115085.14	0.825076	1.65667e-94	7.97092e-92	0.842493	3.05183e-102	2.36895e-100	ZAP70	protein_coding
ENSG00000155307.19	0.807186	2.0769e-87	7.95479e-85	0.841685	0	0	SAMSN1	protein_coding
ENSG00000139193.4	0.84221	4.14564e-102	2.62338e-99	0.841288	0	0	CD27	protein_coding
ENSG00000128815.19	0.839019	1.25983e-100	7.48415e-98	0.840327	3.13527e-101	2.43048e-99	WDFY4	protein_coding
ENSG00000073861.3	0.82353	7.30938e-94	3.37728e-91	0.839401	8.40476e-101	6.50676e-99	TBX21	protein_coding
ENSG00000110848.8	0.837324	7.49864e-100	4.32234e-97	0.83925	9.8632e-101	7.62571e-99	CD69	protein_coding
ENSG00000173557.15	-0.404391	3.46767e-16	9.96943e-15	-0.420819	1.58412e-17	4.37704e-16	FAM166C	protein_coding
ENSG00000133935.7	-0.417993	2.72657e-17	8.46138e-16	-0.419117	0	0	ERG28	protein_coding
ENSG00000170293.9	-0.405075	3.05996e-16	8.84531e-15	-0.398351	2.00185e-16	5.23321e-15	CMTM8	protein_coding
ENSG00000147155.11	-0.378735	3.09106e-14	7.59946e-13	-0.388759	5.60284e-15	1.34788e-13	EBP	protein_coding
ENSG00000006625.18	-0.366658	2.24102e-13	5.19791e-12	-0.384382	1.28191e-14	3.0178e-13	GGCT	protein_coding
ENSG00000244187.8	-0.373863	6.94207e-14	1.66113e-12	-0.3831	1.65465e-14	3.86095e-13	TMEM141	protein_coding
ENSG00000215845.11	-0.348728	3.65497e-12	7.69844e-11	-0.38297	1.69764e-14	3.95492e-13	TSTD1	protein_coding
ENSG00000198712.1	-0.375617	5.1957e-14	1.25616e-12	-0.372439	1.15574e-13	2.51815e-12	MT-CO2	protein_coding
ENSG00000003147.19	-0.349223	3.39178e-12	7.17003e-11	-0.37108	1.45718e-13	3.15016e-12	ICA1	protein_coding
ENSG00000172893.16	-0.364012	3.42168e-13	7.82725e-12	-0.362172	6.29177e-13	1.2925e-11	DHCR7	protein_coding
ENSG00000104549.12	-0.351949	2.24212e-12	4.80073e-11	-0.355404	1.8143e-12	3.57203e-11	SQLE	protein_coding
ENSG00000169242.12	-0.39018	4.37655e-15	1.15553e-13	-0.353713	2.35038e-12	4.58254e-11	EFNA1	protein_coding
ENSG00000115541.11	-0.371036	1.10343e-13	2.60606e-12	-0.353702	2.35455e-12	4.58912e-11	HSPE1	protein_coding
ENSG00000112378.12	-0.367706	1.89339e-13	4.4127e-12	-0.35329	2.50672e-12	4.87104e-11	PERP	protein_coding
ENSG00000174567.8	-0.373466	7.41076e-14	1.76964e-12	-0.352668	2.75551e-12	5.32958e-11	GOLT1A	protein_coding
ENSG00000141744.4	-0.334917	2.79047e-11	5.3598e-10	-0.352489	2.06481e-12	4.04336e-11	PNMT	protein_coding
ENSG00000141741.12	-0.35602	1.19949e-12	2.63021e-11	-0.352472	2.83861e-12	5.47938e-11	MIEN1	protein_coding
ENSG00000140939.14	-0.326518	9.15052e-11	1.66894e-09	-0.350941	3.57695e-12	6.82764e-11	NOL3	protein_coding
ENSG00000125534.10	-0.340947	1.16303e-11	2.32518e-10	-0.349604	4.37149e-12	8.29259e-11	PPDPF	protein_coding
ENSG00000183978.8	-0.343343	8.17134e-12	1.65756e-10	-0.34775	5.76227e-12	1.07931e-10	COA3	protein_coding
ENSG00000175832.13	-0.336092	2.35661e-11	4.55653e-10	-0.346743	4.92539e-12	9.27381e-11	ETV4	protein_coding
ENSG00000149809.16	-0.324403	1.22709e-10	2.20558e-09	-0.34199	1.3404e-11	2.44241e-10	TM7SF2	protein_coding
ENSG00000159079.19	-0.343713	7.73596e-12	1.57363e-10	-0.341885	1.36095e-11	2.47755e-10	CFAP298	protein_coding
ENSG00000164919.11	-0.346944	4.7793e-12	9.95853e-11	-0.341633	1.41152e-11	2.56638e-10	COX6C	protein_coding
ENSG00000132698.15	-0.318556	2.7292e-10	4.73304e-09	-0.34125	1.49183e-11	2.70733e-10	RAB25	protein_coding
ENSG00000168275.16	-0.365704	2.61147e-13	6.03311e-12	-0.341032	1.14876e-11	2.10575e-10	COA6	protein_coding
ENSG00000168528.12	-0.333729	3.30833e-11	6.30869e-10	-0.340928	1.56272e-11	2.83246e-10	SERINC2	protein_coding
ENSG00000172115.9	-0.35883	7.74755e-13	1.72683e-11	-0.337793	2.44884e-11	4.37321e-10	CYCS	protein_coding
ENSG00000186395.8	-0.345993	5.51076e-12	1.14089e-10	-0.335694	3.29776e-11	5.80905e-10	KRT10	protein_coding
ENSG00000185519.9	-0.289895	1.07588e-08	1.53405e-07	-0.334231	3.07909e-11	5.44032e-10	FAM131C	protein_coding
ENSG00000114315.4	-0.326478	9.20236e-11	1.67787e-09	-0.33366	4.39015e-11	7.63398e-10	HES1	protein_coding
ENSG00000147804.10	-0.345146	6.25242e-12	1.28714e-10	-0.333587	4.43573e-11	7.70634e-10	SLC39A4	protein_coding
ENSG00000183048.12	-0.326427	9.26715e-11	1.68862e-09	-0.333475	4.50555e-11	7.8183e-10	SLC25A10	protein_coding
ENSG00000183248.12	-0.327294	8.21291e-11	1.505e-09	-0.332921	3.71282e-11	6.50475e-10	PRR36	protein_coding
ENSG00000253293.5	-0.334852	2.81656e-11	5.40813e-10	-0.330826	4.99874e-11	8.63808e-10	HOXA10	protein_coding
ENSG00000232838.4	-0.320479	2.10226e-10	3.68643e-09	-0.328614	8.84356e-11	1.4919e-09	PET117	protein_coding
ENSG00000212864.3	-0.332928	3.70882e-11	7.03094e-10	-0.327795	7.65745e-11	1.29858e-09	RNF208	protein_coding
ENSG00000160606.11	-0.319331	2.45713e-10	4.28035e-09	-0.327538	1.02506e-10	1.71388e-09	TLCD1	protein_coding
ENSG00000267795.6	-0.324426	1.22321e-10	2.19928e-09	-0.3274	8.09134e-11	1.36976e-09	SMIM22	protein_coding
ENSG00000158716.9	-0.267701	1.41673e-07	1.72262e-06	-0.32648	1.1844e-10	1.9656e-09	DUSP23	protein_coding
ENSG00000205336.14	-0.331127	4.79039e-11	8.96743e-10	-0.326163	1.23672e-10	2.04893e-09	ADGRG1	protein_coding
ENSG00000147676.14	-0.318643	2.69715e-10	4.68026e-09	-0.325392	1.37348e-10	2.26711e-09	MAL2	protein_coding
ENSG00000137563.13	-0.337497	1.92346e-11	3.7556e-10	-0.32477	1.49442e-10	2.45629e-09	GGH	protein_coding
ENSG00000240849.11	-0.295094	5.68961e-09	8.43274e-08	-0.323691	1.72912e-10	2.81268e-09	PEDS1	protein_coding
ENSG00000101213.7	-0.238557	2.98519e-06	2.89701e-05	-0.322822	1.5258e-10	2.50505e-09	PTK6	protein_coding
ENSG00000241685.10	-0.318934	2.59278e-10	4.50452e-09	-0.3225	2.02976e-10	3.28247e-09	ARPC1A	protein_coding
ENSG00000159166.15	-0.319427	2.42546e-10	4.23025e-09	-0.321861	2.21155e-10	3.56358e-09	LAD1	protein_coding
ENSG00000165215.6	-0.338766	1.59978e-11	3.15394e-10	-0.321839	2.2181e-10	3.57315e-09	CLDN3	protein_coding
ENSG00000169738.8	-0.317814	3.01652e-10	5.19882e-09	-0.320885	2.52026e-10	4.032e-09	DCXR	protein_coding
ENSG00000260027.5	-0.268381	1.31347e-07	1.60545e-06	-0.320804	2.54751e-10	4.07224e-09	HOXB7	protein_coding
ENSG00000143590.14	-0.321424	1.84797e-10	3.26212e-09	-0.320368	2.13427e-10	3.44287e-09	EFNA3	protein_coding
ENSG00000158769.18	-0.335173	2.68965e-11	5.17127e-10	-0.319765	2.92571e-10	4.64871e-09	F11R	protein_coding
ENSG00000159214.13	-0.327654	7.80988e-11	1.43476e-09	-0.319331	2.45697e-10	3.93507e-09	CCDC24	protein_coding
ENSG00000095203.14	-0.326026	9.79959e-11	1.78007e-09	-0.317338	3.21631e-10	5.08133e-09	EPB41L4B	protein_coding
ENSG00000167771.6	-0.329788	5.78814e-11	1.07728e-09	-0.317296	4.05671e-10	6.35387e-09	RCOR2	protein_coding
ENSG00000162545.6	-0.314138	4.93568e-10	8.32161e-09	-0.317033	4.19974e-10	6.56338e-09	CAMK2N1	protein_coding
ENSG00000243989.9	-0.27473	6.41818e-08	8.2212e-07	-0.315787	3.96106e-10	6.21242e-09	ACY1	protein_coding
ENSG00000135940.7	-0.340773	1.19309e-11	2.38364e-10	-0.313306	6.83736e-10	1.04477e-08	COX5B	protein_coding
ENSG00000118939.18	-0.306269	1.38475e-09	2.21173e-08	-0.311463	7.03318e-10	1.07272e-08	UCHL3	protein_coding
ENSG00000124107.5	-0.286066	1.70616e-08	2.36273e-07	-0.311239	8.93359e-10	1.34322e-08	SLPI	protein_coding
ENSG00000120440.15	-0.309895	8.64161e-10	1.41877e-08	-0.310177	8.32728e-10	1.25595e-08	TTLL2	protein_coding
ENSG00000175279.22	-0.316644	3.53088e-10	6.04768e-09	-0.310063	1.03921e-09	1.54932e-08	CENPS	protein_coding
ENSG00000204564.12	-0.314064	4.98483e-10	8.39476e-09	-0.30999	1.04897e-09	1.56306e-08	C6orf136	protein_coding
ENSG00000223572.10	-0.322859	1.51795e-10	2.70416e-09	-0.309949	1.05449e-09	1.57089e-08	CKMT1A	protein_coding
ENSG00000119888.11	-0.289913	1.07364e-08	1.53161e-07	-0.309659	1.09448e-09	1.62506e-08	EPCAM	protein_coding
ENSG00000170498.9	-0.319497	2.40233e-10	4.19115e-09	-0.309637	8.9382e-10	1.34357e-08	KISS1	protein_coding
ENSG00000143256.5	-0.309557	9.03218e-10	1.47914e-08	-0.308341	1.2953e-09	1.90477e-08	PFDN2	protein_coding
ENSG00000109929.10	-0.308083	1.09467e-09	1.7747e-08	-0.308332	1.29666e-09	1.90628e-08	SC5D	protein_coding
ENSG00000147684.10	-0.311367	7.12228e-10	1.18267e-08	-0.307608	1.42201e-09	2.07902e-08	NDUFB9	protein_coding
ENSG00000197696.10	-0.297259	4.34761e-09	6.54536e-08	-0.307564	1.17095e-09	1.73373e-08	NMB	protein_coding
ENSG00000237289.10	-0.328152	7.28427e-11	1.34322e-09	-0.30714	1.23717e-09	1.82343e-08	CKMT1B	protein_coding
ENSG00000178821.13	-0.300977	2.72431e-09	4.20476e-08	-0.305734	1.48377e-09	2.1655e-08	TMEM52	protein_coding
ENSG00000096092.6	-0.303853	1.88909e-09	2.97e-08	-0.305154	1.93988e-09	2.79129e-08	TMEM14A	protein_coding
ENSG00000141738.14	-0.343263	8.26884e-12	1.67675e-10	-0.304933	1.99485e-09	2.86403e-08	GRB7	protein_coding
ENSG00000139428.12	-0.310236	8.26313e-10	1.3624e-08	-0.303706	1.92502e-09	2.77128e-08	MMAB	protein_coding
ENSG00000132432.14	-0.228048	8.1847e-06	7.2781e-05	-0.3031	2.51067e-09	3.54686e-08	SEC61G	protein_coding
ENSG00000178934.5	-0.274511	6.58013e-08	8.42309e-07	-0.302358	2.28625e-09	3.25351e-08	LGALS7B	protein_coding
ENSG00000241127.8	-0.308144	1.08592e-09	1.76101e-08	-0.302285	2.77967e-09	3.90886e-08	YAE1	protein_coding
ENSG00000175854.14	-0.297819	4.05344e-09	6.12624e-08	-0.302217	2.32778e-09	3.30694e-08	SWI5	protein_coding
ENSG00000143314.12	-0.297011	4.48406e-09	6.73859e-08	-0.302172	2.81889e-09	3.95924e-08	MRPL24	protein_coding
ENSG00000054179.12	-0.295161	5.64307e-09	8.37014e-08	-0.301819	2.94565e-09	4.12931e-08	ENTPD2	protein_coding
ENSG00000143543.15	-0.309047	9.65419e-10	1.57348e-08	-0.301427	3.09277e-09	4.31902e-08	JTB	protein_coding
ENSG00000124743.6	-0.291	9.40664e-09	1.35811e-07	-0.300599	2.8577e-09	4.0118e-08	KLHL31	protein_coding
ENSG00000269313.5	-0.282054	2.74553e-08	3.69999e-07	-0.300425	3.50229e-09	4.8443e-08	MAGIX	protein_coding
ENSG00000188833.10	-0.286091	1.70096e-08	2.35609e-07	-0.300183	3.01207e-09	4.21633e-08	ENTPD8	protein_coding
ENSG00000052802.13	-0.309308	9.33065e-10	1.52545e-08	-0.299556	3.89952e-09	5.35808e-08	MSMO1	protein_coding
ENSG00000145506.14	-0.315441	4.14849e-10	7.04541e-09	-0.2993	3.36652e-09	4.67093e-08	NKD2	protein_coding
ENSG00000189366.9	-0.305046	1.62104e-09	2.56659e-08	-0.299204	3.40727e-09	4.72296e-08	ALG1L	protein_coding
ENSG00000232388.5	-0.295746	5.2484e-09	7.82462e-08	-0.297902	4.77933e-09	6.49493e-08	SMIM26	protein_coding
ENSG00000125877.13	-0.282993	2.45789e-08	3.33396e-07	-0.297743	4.8736e-09	6.61687e-08	ITPA	protein_coding
ENSG00000101144.13	-0.333494	3.4213e-11	6.51132e-10	-0.296736	4.64051e-09	6.3166e-08	BMP7	protein_coding
ENSG00000239672.8	-0.297694	4.1173e-09	6.21954e-08	-0.296107	5.95229e-09	7.98457e-08	NME1	protein_coding
ENSG00000198899.2	-0.303526	1.96994e-09	3.09124e-08	-0.295997	6.03235e-09	8.08638e-08	MT-ATP6	protein_coding
ENSG00000229637.4	-0.280607	3.25323e-08	4.34396e-07	-0.295875	5.1647e-09	6.98765e-08	PRAC2	protein_coding
ENSG00000117262.19	-0.283532	2.30614e-08	3.13836e-07	-0.295497	5.41276e-09	7.30797e-08	GPR89A	protein_coding
ENSG00000106355.10	-0.289935	1.07072e-08	1.52839e-07	-0.295385	6.49874e-09	8.68159e-08	LSM5	protein_coding
ENSG00000124249.7	-0.288503	1.27333e-08	1.79668e-07	-0.295348	5.51364e-09	7.43384e-08	KCNK15	protein_coding
ENSG00000010438.17	-0.293821	6.65843e-09	9.78396e-08	-0.294932	6.86663e-09	9.13323e-08	PRSS3	protein_coding
ENSG00000164855.16	-0.298341	3.79727e-09	5.76152e-08	-0.294787	5.90998e-09	7.93147e-08	TMEM184A	protein_coding
ENSG00000185813.11	-0.301039	2.70323e-09	4.17767e-08	-0.294238	7.4688e-09	9.89574e-08	PCYT2	protein_coding
