# Supplementary material for: Comprehensive bioinformatics analysis and experimental validation revealed that high-expression ARHGAP9 affected the progression of gastric cancer
Source: Research Square preprint supplement (doi:10.21203/rs.3.rs-7311091/v1), 2025-12-05
Supplement: Supplementary file 2 [file 2b0ceac85bcd3df2e12c32c4.xlsx]

## Sheet: Sheet1
miRDB	miRWalk	TargetScan
hsa-miR-887-5p	hsa-let-7a-5p	hsa-miR-665
hsa-miR-6825-5p	hsa-let-7a-2-3p	hsa-miR-491-5p
hsa-miR-6881-3p	hsa-let-7b-5p	hsa-miR-133a-3p.2
hsa-miR-8060	hsa-let-7c-5p	hsa-miR-133b
hsa-miR-30c-1-3p	hsa-let-7c-3p	hsa-miR-133a-3p.1
hsa-miR-6788-5p	hsa-let-7d-5p	hsa-miR-370-3p
hsa-miR-30c-2-3p	hsa-let-7d-3p	hsa-miR-6893-3p
hsa-miR-3059-5p	hsa-let-7e-5p	hsa-miR-22-3p
hsa-miR-3924	hsa-let-7e-3p	hsa-miR-485-5p
hsa-miR-4711-5p	hsa-miR-15a-3p	hsa-miR-6884-5p
hsa-miR-9903	hsa-miR-16-5p
hsa-miR-3190-5p	hsa-miR-17-3p
hsa-miR-3922-3p	hsa-miR-19b-1-5p
hsa-miR-7106-5p	hsa-miR-20a-5p
hsa-miR-133b	hsa-miR-21-3p
hsa-miR-133a-3p	hsa-miR-22-5p
hsa-miR-6829-5p	hsa-miR-22-3p
hsa-miR-3150a-3p	hsa-miR-23a-5p
hsa-miR-6763-5p	hsa-miR-23a-3p
hsa-miR-4795-3p	hsa-miR-24-3p
hsa-miR-6884-5p	hsa-miR-24-2-5p
hsa-miR-485-5p	hsa-miR-25-5p
hsa-miR-5589-5p	hsa-miR-25-3p
hsa-miR-6796-5p	hsa-miR-27a-5p
hsa-miR-3176	hsa-miR-27a-3p
hsa-miR-4725-3p	hsa-miR-28-3p
hsa-miR-6722-3p	hsa-miR-29a-5p
hsa-miR-6780b-5p	hsa-miR-29a-3p
hsa-miR-4271	hsa-miR-31-5p
hsa-miR-1909-3p	hsa-miR-33a-5p
hsa-miR-3913-5p	hsa-miR-92a-1-5p
hsa-miR-450a-1-3p	hsa-miR-92a-3p
hsa-miR-6513-5p	hsa-miR-92a-2-5p
hsa-miR-3122	hsa-miR-93-5p
hsa-miR-4781-3p	hsa-miR-93-3p
hsa-miR-4756-3p	hsa-miR-99a-5p
hsa-miR-5197-3p	hsa-miR-99a-3p
hsa-miR-6088	hsa-miR-100-5p
hsa-miR-4770	hsa-miR-101-5p
hsa-miR-143-3p	hsa-miR-101-3p
hsa-miR-6077	hsa-miR-29b-1-5p
hsa-miR-6783-5p	hsa-miR-29b-2-5p
hsa-miR-126-5p	hsa-miR-103a-2-5p
hsa-miR-939-5p	hsa-miR-103a-3p
hsa-miR-1343-5p	hsa-miR-103a-1-5p
hsa-miR-4425	hsa-miR-105-5p
hsa-miR-3132	hsa-miR-105-3p
hsa-miR-2115-3p	hsa-miR-107
hsa-miR-18a-3p	hsa-miR-192-3p
hsa-miR-3175	hsa-miR-197-5p
	hsa-miR-197-3p
	hsa-miR-198
	hsa-miR-199a-5p
	hsa-miR-208a-5p
	hsa-miR-129-5p
	hsa-miR-129-1-3p
	hsa-miR-148a-5p
	hsa-miR-30c-5p
	hsa-miR-30c-2-3p
	hsa-miR-30d-3p
	hsa-miR-139-5p
	hsa-miR-7-2-3p
	hsa-miR-10a-3p
	hsa-miR-10b-3p
	hsa-miR-34a-5p
	hsa-miR-181a-5p
	hsa-miR-181b-5p
	hsa-miR-181c-5p
	hsa-miR-182-5p
	hsa-miR-182-3p
	hsa-miR-183-5p
	hsa-miR-187-5p
	hsa-miR-187-3p
	hsa-miR-199b-5p
	hsa-miR-204-5p
	hsa-miR-204-3p
	hsa-miR-205-5p
	hsa-miR-211-5p
	hsa-miR-212-5p
	hsa-miR-214-5p
	hsa-miR-216a-5p
	hsa-miR-216a-3p
	hsa-miR-217-5p
	hsa-miR-219a-5p
	hsa-miR-222-5p
	hsa-miR-222-3p
	hsa-miR-224-3p
	hsa-miR-200b-5p
	hsa-miR-200b-3p
	hsa-let-7g-3p
	hsa-let-7i-5p
	hsa-let-7i-3p
	hsa-miR-15b-5p
	hsa-miR-23b-5p
	hsa-miR-23b-3p
	hsa-miR-27b-3p
	hsa-miR-30b-3p
	hsa-miR-124-5p
	hsa-miR-124-3p
	hsa-miR-125b-1-3p
	hsa-miR-128-1-5p
	hsa-miR-128-3p
	hsa-miR-132-5p
	hsa-miR-133a-3p
	hsa-miR-135a-3p
	hsa-miR-135a-2-3p
	hsa-miR-137-5p
	hsa-miR-138-5p
	hsa-miR-143-5p
	hsa-miR-145-5p
	hsa-miR-145-3p
	hsa-miR-152-5p
	hsa-miR-152-3p
	hsa-miR-9-5p
	hsa-miR-125a-3p
	hsa-miR-125b-2-3p
	hsa-miR-127-5p
	hsa-miR-127-3p
	hsa-miR-129-2-3p
	hsa-miR-134-5p
	hsa-miR-134-3p
	hsa-miR-138-1-3p
	hsa-miR-149-5p
	hsa-miR-149-3p
	hsa-miR-150-3p
	hsa-miR-154-5p
	hsa-miR-185-5p
	hsa-miR-185-3p
	hsa-miR-188-5p
	hsa-miR-188-3p
	hsa-miR-193a-5p
	hsa-miR-195-5p
	hsa-miR-195-3p
	hsa-miR-320a-5p
	hsa-miR-320a-3p
	hsa-miR-155-3p
	hsa-miR-128-2-5p
	hsa-miR-194-3p
	hsa-miR-106b-3p
	hsa-miR-29c-5p
	hsa-miR-29c-3p
	hsa-miR-30c-1-3p
	hsa-miR-200a-5p
	hsa-miR-302a-3p
	hsa-miR-219a-2-3p
	hsa-miR-34b-3p
	hsa-miR-34c-5p
	hsa-miR-34c-3p
	hsa-miR-301a-5p
	hsa-miR-99b-5p
	hsa-miR-99b-3p
	hsa-miR-296-5p
	hsa-miR-130b-5p
	hsa-miR-30e-3p
	hsa-miR-361-5p
	hsa-miR-361-3p
	hsa-miR-365a-5p
	hsa-miR-365b-5p
	hsa-miR-302c-5p
	hsa-miR-302c-3p
	hsa-miR-302d-5p
	hsa-miR-302d-3p
	hsa-miR-370-5p
	hsa-miR-370-3p
	hsa-miR-371a-5p
	hsa-miR-372-5p
	hsa-miR-372-3p
	hsa-miR-375-5p
	hsa-miR-375-3p
	hsa-miR-377-5p
	hsa-miR-378a-5p
	hsa-miR-378a-3p
	hsa-miR-381-3p
	hsa-miR-383-5p
	hsa-miR-340-3p
	hsa-miR-330-5p
	hsa-miR-330-3p
	hsa-miR-328-5p
	hsa-miR-328-3p
	hsa-miR-342-5p
	hsa-miR-337-5p
	hsa-miR-323a-5p
	hsa-miR-326
	hsa-miR-151a-3p
	hsa-miR-135b-3p
	hsa-miR-148b-3p
	hsa-miR-331-5p
	hsa-miR-331-3p
	hsa-miR-324-5p
	hsa-miR-324-3p
	hsa-miR-338-5p
	hsa-miR-339-5p
	hsa-miR-133b
	hsa-miR-325
	hsa-miR-345-5p
	hsa-miR-345-3p
	hsa-miR-196b-5p
	hsa-miR-422a
	hsa-miR-423-5p
	hsa-miR-423-3p
	hsa-miR-425-5p
	hsa-miR-425-3p
	hsa-miR-20b-5p
	hsa-miR-20b-3p
	hsa-miR-450a-5p
	hsa-miR-450a-1-3p
	hsa-miR-431-5p
	hsa-miR-431-3p
	hsa-miR-433-5p
	hsa-miR-433-3p
	hsa-miR-329-5p
	hsa-miR-329-3p
	hsa-miR-409-5p
	hsa-miR-412-5p
	hsa-miR-412-3p
	hsa-miR-410-5p
	hsa-miR-483-5p
	hsa-miR-483-3p
	hsa-miR-484
	hsa-miR-485-5p
	hsa-miR-486-5p
	hsa-miR-486-3p
	hsa-miR-487a-5p
	hsa-miR-490-5p
	hsa-miR-491-5p
	hsa-miR-511-5p
	hsa-miR-146b-3p
	hsa-miR-202-3p
	hsa-miR-492
	hsa-miR-493-5p
	hsa-miR-493-3p
	hsa-miR-432-5p
	hsa-miR-432-3p
	hsa-miR-494-5p
	hsa-miR-496
	hsa-miR-193b-5p
	hsa-miR-193b-3p
	hsa-miR-497-5p
	hsa-miR-497-3p
	hsa-miR-181d-3p
	hsa-miR-512-5p
	hsa-miR-512-3p
	hsa-miR-498-5p
	hsa-miR-520e-5p
	hsa-miR-520e-3p
	hsa-miR-515-3p
	hsa-miR-519e-5p
	hsa-miR-519e-3p
	hsa-miR-520f-5p
	hsa-miR-520f-3p
	hsa-miR-519c-5p
	hsa-miR-520a-3p
	hsa-miR-526b-5p
	hsa-miR-519b-5p
	hsa-miR-525-3p
	hsa-miR-523-5p
	hsa-miR-518f-3p
	hsa-miR-520b-5p
	hsa-miR-520b-3p
	hsa-miR-518b
	hsa-miR-526a-5p
	hsa-miR-520c-5p
	hsa-miR-520c-3p
	hsa-miR-524-3p
	hsa-miR-517-5p
	hsa-miR-519d-5p
	hsa-miR-519d-3p
	hsa-miR-520d-3p
	hsa-miR-520g-5p
	hsa-miR-516b-5p
	hsa-miR-516b-3p
	hsa-miR-518e-5p
	hsa-miR-518e-3p
	hsa-miR-518a-3p
	hsa-miR-518d-5p
	hsa-miR-518d-3p
	hsa-miR-520h
	hsa-miR-522-5p
	hsa-miR-519a-5p
	hsa-miR-516a-3p
	hsa-miR-519a-2-5p
	hsa-miR-499a-5p
	hsa-miR-499a-3p
	hsa-miR-500a-5p
	hsa-miR-500a-3p
	hsa-miR-501-5p
	hsa-miR-501-3p
	hsa-miR-502-3p
	hsa-miR-503-5p
	hsa-miR-503-3p
	hsa-miR-504-5p
	hsa-miR-504-3p
	hsa-miR-505-5p
	hsa-miR-505-3p
	hsa-miR-513a-5p
	hsa-miR-508-3p
	hsa-miR-509-5p
	hsa-miR-510-5p
	hsa-miR-514a-5p
	hsa-miR-532-5p
	hsa-miR-532-3p
	hsa-miR-455-5p
	hsa-miR-487b-3p
	hsa-miR-551a
	hsa-miR-552-5p
	hsa-miR-552-3p
	hsa-miR-554
	hsa-miR-92b-5p
	hsa-miR-92b-3p
	hsa-miR-555
	hsa-miR-557
	hsa-miR-558
	hsa-miR-567
	hsa-miR-571
	hsa-miR-572
	hsa-miR-574-5p
	hsa-miR-574-3p
	hsa-miR-575
	hsa-miR-579-5p
	hsa-miR-582-3p
	hsa-miR-583
	hsa-miR-584-5p
	hsa-miR-584-3p
	hsa-miR-548b-5p
	hsa-miR-588
	hsa-miR-550a-5p
	hsa-miR-550a-3p
	hsa-miR-593-5p
	hsa-miR-593-3p
	hsa-miR-596
	hsa-miR-597-5p
	hsa-miR-598-5p
	hsa-miR-598-3p
	hsa-miR-601
	hsa-miR-602
	hsa-miR-604
	hsa-miR-605-5p
	hsa-miR-608
	hsa-miR-609
	hsa-miR-610
	hsa-miR-611
	hsa-miR-612
	hsa-miR-614
	hsa-miR-615-5p
	hsa-miR-615-3p
	hsa-miR-616-3p
	hsa-miR-617
	hsa-miR-618
	hsa-miR-619-3p
	hsa-miR-620
	hsa-miR-621
	hsa-miR-622
	hsa-miR-623
	hsa-miR-624-5p
	hsa-miR-629-3p
	hsa-miR-631
	hsa-miR-632
	hsa-miR-634
	hsa-miR-635
	hsa-miR-636
	hsa-miR-637
	hsa-miR-638
	hsa-miR-639
	hsa-miR-640
	hsa-miR-642a-5p
	hsa-miR-642a-3p
	hsa-miR-643
	hsa-miR-644a
	hsa-miR-646
	hsa-miR-647
	hsa-miR-648
	hsa-miR-650
	hsa-miR-652-5p
	hsa-miR-652-3p
	hsa-miR-661
	hsa-miR-662
	hsa-miR-663a
	hsa-miR-449b-5p
	hsa-miR-654-5p
	hsa-miR-654-3p
	hsa-miR-656-5p
	hsa-miR-549a-5p
	hsa-miR-659-3p
	hsa-miR-542-5p
	hsa-miR-758-5p
	hsa-miR-671-5p
	hsa-miR-671-3p
	hsa-miR-668-5p
	hsa-miR-550a-3-5p
	hsa-miR-767-5p
	hsa-miR-1224-5p
	hsa-miR-1224-3p
	hsa-miR-320b
	hsa-miR-320c
	hsa-miR-1296-5p
	hsa-miR-1468-5p
	hsa-miR-1323
	hsa-miR-1271-5p
	hsa-miR-1271-3p
	hsa-miR-1301-3p
	hsa-miR-454-5p
	hsa-miR-1185-2-3p
	hsa-miR-449c-5p
	hsa-miR-769-3p
	hsa-miR-766-5p
	hsa-miR-766-3p
	hsa-miR-378d
	hsa-miR-1185-1-3p
	hsa-miR-670-5p
	hsa-miR-670-3p
	hsa-miR-1298-5p
	hsa-miR-1298-3p
	hsa-miR-2113
	hsa-miR-761
	hsa-miR-764
	hsa-miR-759
	hsa-miR-765
	hsa-miR-770-5p
	hsa-miR-675-5p
	hsa-miR-675-3p
	hsa-miR-891a-5p
	hsa-miR-891a-3p
	hsa-miR-892a
	hsa-miR-450b-3p
	hsa-miR-890
	hsa-miR-888-3p
	hsa-miR-892b
	hsa-miR-541-3p
	hsa-miR-889-5p
	hsa-miR-875-5p
	hsa-miR-875-3p
	hsa-miR-876-5p
	hsa-miR-147b-3p
	hsa-miR-744-3p
	hsa-miR-885-5p
	hsa-miR-885-3p
	hsa-miR-877-5p
	hsa-miR-877-3p
	hsa-miR-887-5p
	hsa-miR-887-3p
	hsa-miR-665
	hsa-miR-873-5p
	hsa-miR-873-3p
	hsa-miR-543
	hsa-miR-760
	hsa-miR-301b-5p
	hsa-miR-216b-5p
	hsa-miR-920
	hsa-miR-921
	hsa-miR-509-3-5p
	hsa-miR-934
	hsa-miR-935
	hsa-miR-936
	hsa-miR-937-5p
	hsa-miR-937-3p
	hsa-miR-939-5p
	hsa-miR-939-3p
	hsa-miR-940
	hsa-miR-941
	hsa-miR-942-5p
	hsa-miR-942-3p
	hsa-miR-943
	hsa-miR-1178-5p
	hsa-miR-1180-5p
	hsa-miR-1180-3p
	hsa-miR-1181
	hsa-miR-1183
	hsa-miR-1184
	hsa-miR-1225-5p
	hsa-miR-1225-3p
	hsa-miR-1226-5p
	hsa-miR-1226-3p
	hsa-miR-1227-5p
	hsa-miR-1227-3p
	hsa-miR-1228-5p
	hsa-miR-1228-3p
	hsa-miR-1229-5p
	hsa-miR-1229-3p
	hsa-miR-1231
	hsa-miR-1233-5p
	hsa-miR-1234-3p
	hsa-miR-1236-5p
	hsa-miR-1236-3p
	hsa-miR-1237-5p
	hsa-miR-1237-3p
	hsa-miR-1238-5p
	hsa-miR-1238-3p
	hsa-miR-1202
	hsa-miR-663b
	hsa-miR-1207-5p
	hsa-miR-1207-3p
	hsa-miR-1285-5p
	hsa-miR-1285-3p
	hsa-miR-1286
	hsa-miR-1287-5p
	hsa-miR-1289
	hsa-miR-1290
	hsa-miR-1291
	hsa-miR-1293
	hsa-miR-1294
	hsa-miR-1295a
	hsa-miR-1299
	hsa-miR-548l
	hsa-miR-1303
	hsa-miR-1304-5p
	hsa-miR-1304-3p
	hsa-miR-1244
	hsa-miR-1246
	hsa-miR-1247-3p
	hsa-miR-1249-5p
	hsa-miR-1250-5p
	hsa-miR-1250-3p
	hsa-miR-1251-3p
	hsa-miR-1256
	hsa-miR-1257
	hsa-miR-1260a
	hsa-miR-1261
	hsa-miR-1262
	hsa-miR-1263
	hsa-miR-1265
	hsa-miR-1266-5p
	hsa-miR-1268a
	hsa-miR-1275
	hsa-miR-1276
	hsa-miR-1278
	hsa-miR-1284
	hsa-miR-1288-5p
	hsa-miR-1288-3p
	hsa-miR-1292-5p
	hsa-miR-1255b-2-3p
	hsa-miR-664a-3p
	hsa-miR-1306-3p
	hsa-miR-1307-3p
	hsa-miR-513c-5p
	hsa-miR-1197
	hsa-miR-1324
	hsa-miR-1469
	hsa-miR-1470
	hsa-miR-1471
	hsa-miR-1538
	hsa-miR-1539
	hsa-miR-320d
	hsa-miR-1827
	hsa-miR-1908-5p
	hsa-miR-1908-3p
	hsa-miR-1909-3p
	hsa-miR-1910-3p
	hsa-miR-1911-5p
	hsa-miR-1911-3p
	hsa-miR-1912-5p
	hsa-miR-1912-3p
	hsa-miR-1913
	hsa-miR-1914-5p
	hsa-miR-1914-3p
	hsa-miR-1915-5p
	hsa-miR-1915-3p
	hsa-miR-1972
	hsa-miR-1973
	hsa-miR-1976
	hsa-miR-2114-5p
	hsa-miR-2115-5p
	hsa-miR-2115-3p
	hsa-miR-2116-5p
	hsa-miR-2117
	hsa-miR-548q
	hsa-miR-2276-5p
	hsa-miR-2276-3p
	hsa-miR-2277-5p
	hsa-miR-2277-3p
	hsa-miR-2278
	hsa-miR-2681-5p
	hsa-miR-2681-3p
	hsa-miR-2682-3p
	hsa-miR-711
	hsa-miR-3118
	hsa-miR-3120-5p
	hsa-miR-3120-3p
	hsa-miR-3121-5p
	hsa-miR-3122
	hsa-miR-3124-5p
	hsa-miR-3124-3p
	hsa-miR-548s
	hsa-miR-3125
	hsa-miR-3126-5p
	hsa-miR-3126-3p
	hsa-miR-3127-5p
	hsa-miR-3129-5p
	hsa-miR-3130-5p
	hsa-miR-3130-3p
	hsa-miR-3132
	hsa-miR-3135a
	hsa-miR-544b
	hsa-miR-3137
	hsa-miR-3138
	hsa-miR-3140-3p
	hsa-miR-3141
	hsa-miR-3142
	hsa-miR-3144-5p
	hsa-miR-3144-3p
	hsa-miR-1273c
	hsa-miR-3147
	hsa-miR-3148
	hsa-miR-3150a-3p
	hsa-miR-3151-5p
	hsa-miR-3151-3p
	hsa-miR-3153
	hsa-miR-3074-5p
	hsa-miR-3074-3p
	hsa-miR-3154
	hsa-miR-3155a
	hsa-miR-3156-5p
	hsa-miR-3156-3p
	hsa-miR-3157-5p
	hsa-miR-3157-3p
	hsa-miR-3158-5p
	hsa-miR-3158-3p
	hsa-miR-3160-5p
	hsa-miR-3160-3p
	hsa-miR-1260b
	hsa-miR-3170
	hsa-miR-1193
	hsa-miR-323b-5p
	hsa-miR-323b-3p
	hsa-miR-3174
	hsa-miR-3175
	hsa-miR-3176
	hsa-miR-3177-3p
	hsa-miR-3179
	hsa-miR-3180-5p
	hsa-miR-3180-3p
	hsa-miR-3181
	hsa-miR-3182
	hsa-miR-3183
	hsa-miR-3184-5p
	hsa-miR-3184-3p
	hsa-miR-3065-3p
	hsa-miR-3186-5p
	hsa-miR-3187-5p
	hsa-miR-3187-3p
	hsa-miR-3188
	hsa-miR-3189-5p
	hsa-miR-3189-3p
	hsa-miR-320e
	hsa-miR-3190-5p
	hsa-miR-3190-3p
	hsa-miR-3191-5p
	hsa-miR-3191-3p
	hsa-miR-3192-5p
	hsa-miR-3192-3p
	hsa-miR-3193
	hsa-miR-3194-5p
	hsa-miR-3196
	hsa-miR-3197
	hsa-miR-3198
	hsa-miR-3199
	hsa-miR-3200-5p
	hsa-miR-3200-3p
	hsa-miR-4296
	hsa-miR-378c
	hsa-miR-4294
	hsa-miR-4299
	hsa-miR-4298
	hsa-miR-4300
	hsa-miR-4304
	hsa-miR-4302
	hsa-miR-4306
	hsa-miR-4309
	hsa-miR-4312
	hsa-miR-4313
	hsa-miR-4316
	hsa-miR-4314
	hsa-miR-4318
	hsa-miR-4319
	hsa-miR-4322
	hsa-miR-4257
	hsa-miR-4259
	hsa-miR-4260
	hsa-miR-4253
	hsa-miR-4251
	hsa-miR-4254
	hsa-miR-4255
	hsa-miR-4252
	hsa-miR-4326
	hsa-miR-4327
	hsa-miR-4261
	hsa-miR-4265
	hsa-miR-4266
	hsa-miR-4267
	hsa-miR-2355-3p
	hsa-miR-4268
	hsa-miR-4270
	hsa-miR-4271
	hsa-miR-4273
	hsa-miR-4281
	hsa-miR-4278
	hsa-miR-4280
	hsa-miR-4285
	hsa-miR-4283
	hsa-miR-4286
	hsa-miR-4287
	hsa-miR-4288
	hsa-miR-4292
	hsa-miR-4289
	hsa-miR-4290
	hsa-miR-4291
	hsa-miR-4329
	hsa-miR-4330
	hsa-miR-500b-3p
	hsa-miR-3605-5p
	hsa-miR-3605-3p
	hsa-miR-3614-5p
	hsa-miR-3615
	hsa-miR-3617-5p
	hsa-miR-3619-3p
	hsa-miR-23c
	hsa-miR-3620-5p
	hsa-miR-3620-3p
	hsa-miR-3621
	hsa-miR-3622a-5p
	hsa-miR-3622a-3p
	hsa-miR-3622b-5p
	hsa-miR-3622b-3p
	hsa-miR-3648
	hsa-miR-3649
	hsa-miR-3652
	hsa-miR-3655
	hsa-miR-3657
	hsa-miR-3658
	hsa-miR-3659
	hsa-miR-3660
	hsa-miR-3661
	hsa-miR-3663-3p
	hsa-miR-3664-5p
	hsa-miR-3664-3p
	hsa-miR-3665
	hsa-miR-3667-3p
	hsa-miR-3670
	hsa-miR-3675-5p
	hsa-miR-3677-5p
	hsa-miR-3677-3p
	hsa-miR-3679-5p
	hsa-miR-3679-3p
	hsa-miR-3680-5p
	hsa-miR-3680-3p
	hsa-miR-3682-3p
	hsa-miR-3689a-5p
	hsa-miR-3689a-3p
	hsa-miR-3690
	hsa-miR-3691-5p
	hsa-miR-3691-3p
	hsa-miR-3692-5p
	hsa-miR-3692-3p
	hsa-miR-3180
	hsa-miR-3907
	hsa-miR-3689b-5p
	hsa-miR-3689b-3p
	hsa-miR-3908
	hsa-miR-3909
	hsa-miR-3911
	hsa-miR-3912-5p
	hsa-miR-3913-5p
	hsa-miR-3916
	hsa-miR-3917
	hsa-miR-3918
	hsa-miR-3150b-5p
	hsa-miR-3150b-3p
	hsa-miR-3921
	hsa-miR-3922-3p
	hsa-miR-3926
	hsa-miR-676-3p
	hsa-miR-3928-5p
	hsa-miR-3928-3p
	hsa-miR-3929
	hsa-miR-3934-5p
	hsa-miR-3934-3p
	hsa-miR-3935
	hsa-miR-3937
	hsa-miR-3939
	hsa-miR-3940-5p
	hsa-miR-3942-5p
	hsa-miR-3943
	hsa-miR-3944-5p
	hsa-miR-3944-3p
	hsa-miR-3945
	hsa-miR-642b-5p
	hsa-miR-642b-3p
	hsa-miR-550b-2-5p
	hsa-miR-550b-3p
	hsa-miR-1268b
	hsa-miR-378e
	hsa-miR-378f
	hsa-miR-4422
	hsa-miR-378g
	hsa-miR-4425
	hsa-miR-4428
	hsa-miR-4429
	hsa-miR-4430
	hsa-miR-4431
	hsa-miR-4433a-5p
	hsa-miR-4433a-3p
	hsa-miR-4436a
	hsa-miR-4443
	hsa-miR-4444
	hsa-miR-4446-5p
	hsa-miR-4446-3p
	hsa-miR-4447
	hsa-miR-4448
	hsa-miR-4449
	hsa-miR-4450
	hsa-miR-4451
	hsa-miR-4452
	hsa-miR-4453
	hsa-miR-4454
	hsa-miR-4455
	hsa-miR-378h
	hsa-miR-3135b
	hsa-miR-4462
	hsa-miR-4464
	hsa-miR-4465
	hsa-miR-4466
	hsa-miR-4467
	hsa-miR-4469
	hsa-miR-4472
	hsa-miR-4474-3p
	hsa-miR-4476
	hsa-miR-4478
	hsa-miR-3689c
	hsa-miR-3689d
	hsa-miR-3689e
	hsa-miR-3689f
	hsa-miR-4479
	hsa-miR-3155b
	hsa-miR-4481
	hsa-miR-4482-5p
	hsa-miR-4483
	hsa-miR-4486
	hsa-miR-4487
	hsa-miR-4488
	hsa-miR-4489
	hsa-miR-4492
	hsa-miR-4494
	hsa-miR-4496
	hsa-miR-4497
	hsa-miR-4498
	hsa-miR-4499
	hsa-miR-4502
	hsa-miR-4505
	hsa-miR-4506
	hsa-miR-2392
	hsa-miR-4507
	hsa-miR-4508
	hsa-miR-4510
	hsa-miR-4511
	hsa-miR-4512
	hsa-miR-4513
	hsa-miR-4514
	hsa-miR-4516
	hsa-miR-4518
	hsa-miR-4519
	hsa-miR-4520-5p
	hsa-miR-1269b
	hsa-miR-4523
	hsa-miR-4524a-5p
	hsa-miR-4524a-3p
	hsa-miR-4525
	hsa-miR-4526
	hsa-miR-4527
	hsa-miR-4529-5p
	hsa-miR-4529-3p
	hsa-miR-4530
	hsa-miR-4533
	hsa-miR-4534
	hsa-miR-378i
	hsa-miR-4535
	hsa-miR-1587
	hsa-miR-4537
	hsa-miR-4538
	hsa-miR-4539
	hsa-miR-4540
	hsa-miR-3960
	hsa-miR-3972
	hsa-miR-3973
	hsa-miR-3976
	hsa-miR-3978
	hsa-miR-4632-5p
	hsa-miR-4633-5p
	hsa-miR-4633-3p
	hsa-miR-4638-5p
	hsa-miR-4638-3p
	hsa-miR-4639-3p
	hsa-miR-4640-5p
	hsa-miR-4640-3p
	hsa-miR-4641
	hsa-miR-4642
	hsa-miR-4646-5p
	hsa-miR-4646-3p
	hsa-miR-4647
	hsa-miR-4649-5p
	hsa-miR-4649-3p
	hsa-miR-4650-5p
	hsa-miR-4650-3p
	hsa-miR-4651
	hsa-miR-4652-3p
	hsa-miR-4653-5p
	hsa-miR-4653-3p
	hsa-miR-4654
	hsa-miR-4655-5p
	hsa-miR-4656
	hsa-miR-4657
	hsa-miR-4658
	hsa-miR-4660
	hsa-miR-4661-5p
	hsa-miR-4661-3p
	hsa-miR-4663
	hsa-miR-4664-5p
	hsa-miR-4664-3p
	hsa-miR-4665-5p
	hsa-miR-4665-3p
	hsa-miR-4667-5p
	hsa-miR-4667-3p
	hsa-miR-4668-3p
	hsa-miR-219b-5p
	hsa-miR-219b-3p
	hsa-miR-4669
	hsa-miR-4670-5p
	hsa-miR-4671-5p
	hsa-miR-4672
	hsa-miR-4673
	hsa-miR-4674
	hsa-miR-4675
	hsa-miR-4676-5p
	hsa-miR-4676-3p
	hsa-miR-4677-5p
	hsa-miR-4681
	hsa-miR-4682
	hsa-miR-4683
	hsa-miR-4684-3p
	hsa-miR-4685-5p
	hsa-miR-4685-3p
	hsa-miR-4686
	hsa-miR-4687-5p
	hsa-miR-4687-3p
	hsa-miR-1343-3p
	hsa-miR-4688
	hsa-miR-4689
	hsa-miR-4690-5p
	hsa-miR-4690-3p
	hsa-miR-4691-5p
	hsa-miR-4691-3p
	hsa-miR-4692
	hsa-miR-4695-5p
	hsa-miR-4695-3p
	hsa-miR-4696
	hsa-miR-4697-5p
	hsa-miR-4697-3p
	hsa-miR-4700-5p
	hsa-miR-4700-3p
	hsa-miR-4701-5p
	hsa-miR-4701-3p
	hsa-miR-4704-5p
	hsa-miR-4706
	hsa-miR-4708-5p
	hsa-miR-4708-3p
	hsa-miR-4709-3p
	hsa-miR-4710
	hsa-miR-4711-5p
	hsa-miR-4711-3p
	hsa-miR-4712-3p
	hsa-miR-4713-5p
	hsa-miR-4713-3p
	hsa-miR-4715-5p
	hsa-miR-4716-5p
	hsa-miR-4716-3p
	hsa-miR-4717-3p
	hsa-miR-4720-5p
	hsa-miR-4721
	hsa-miR-4722-5p
	hsa-miR-4722-3p
	hsa-miR-4723-5p
	hsa-miR-4723-3p
	hsa-miR-4724-3p
	hsa-miR-4725-5p
	hsa-miR-4725-3p
	hsa-miR-4726-5p
	hsa-miR-4726-3p
	hsa-miR-4727-5p
	hsa-miR-4727-3p
	hsa-miR-4728-5p
	hsa-miR-4728-3p
	hsa-miR-4730
	hsa-miR-4731-5p
	hsa-miR-4732-5p
	hsa-miR-4732-3p
	hsa-miR-4733-5p
	hsa-miR-4733-3p
	hsa-miR-4734
	hsa-miR-4736
	hsa-miR-4737
	hsa-miR-3064-5p
	hsa-miR-3064-3p
	hsa-miR-4738-5p
	hsa-miR-4738-3p
	hsa-miR-4739
	hsa-miR-4740-5p
	hsa-miR-4740-3p
	hsa-miR-4742-5p
	hsa-miR-4742-3p
	hsa-miR-4743-5p
	hsa-miR-4743-3p
	hsa-miR-122b-3p
	hsa-miR-4745-5p
	hsa-miR-4745-3p
	hsa-miR-4746-5p
	hsa-miR-4746-3p
	hsa-miR-4747-3p
	hsa-miR-4748
	hsa-miR-4749-5p
	hsa-miR-4749-3p
	hsa-miR-4750-5p
	hsa-miR-4750-3p
	hsa-miR-4751
	hsa-miR-4753-3p
	hsa-miR-371b-3p
	hsa-miR-4754
	hsa-miR-4755-5p
	hsa-miR-4755-3p
	hsa-miR-499b-3p
	hsa-miR-4756-3p
	hsa-miR-4757-5p
	hsa-miR-4757-3p
	hsa-miR-4758-5p
	hsa-miR-4758-3p
	hsa-miR-4759
	hsa-miR-4761-5p
	hsa-miR-4763-5p
	hsa-miR-4763-3p
	hsa-miR-4764-5p
	hsa-miR-4764-3p
	hsa-miR-4767
	hsa-miR-4768-3p
	hsa-miR-4769-5p
	hsa-miR-4769-3p
	hsa-miR-4771
	hsa-miR-4772-3p
	hsa-miR-4773
	hsa-miR-4776-5p
	hsa-miR-4776-3p
	hsa-miR-4778-3p
	hsa-miR-4779
	hsa-miR-4436b-3p
	hsa-miR-4781-5p
	hsa-miR-4782-3p
	hsa-miR-4783-5p
	hsa-miR-4783-3p
	hsa-miR-4784
	hsa-miR-4785
	hsa-miR-2467-5p
	hsa-miR-2467-3p
	hsa-miR-4786-5p
	hsa-miR-4786-3p
	hsa-miR-4787-5p
	hsa-miR-4787-3p
	hsa-miR-4788
	hsa-miR-4793-5p
	hsa-miR-4793-3p
	hsa-miR-4794
	hsa-miR-4797-3p
	hsa-miR-4799-5p
	hsa-miR-4799-3p
	hsa-miR-4800-5p
	hsa-miR-4800-3p
	hsa-miR-4802-3p
	hsa-miR-4999-3p
	hsa-miR-5001-5p
	hsa-miR-5001-3p
	hsa-miR-5002-5p
	hsa-miR-5002-3p
	hsa-miR-5003-3p
	hsa-miR-5004-5p
	hsa-miR-5004-3p
	hsa-miR-5006-5p
	hsa-miR-5006-3p
	hsa-miR-5007-5p
	hsa-miR-5008-5p
	hsa-miR-5008-3p
	hsa-miR-5009-5p
	hsa-miR-5010-5p
	hsa-miR-5010-3p
	hsa-miR-5047
	hsa-miR-5087
	hsa-miR-5088-5p
	hsa-miR-5088-3p
	hsa-miR-5089-5p
	hsa-miR-5090
	hsa-miR-5091
	hsa-miR-5093
	hsa-miR-5186
	hsa-miR-5187-5p
	hsa-miR-5187-3p
	hsa-miR-5189-5p
	hsa-miR-5190
	hsa-miR-5191
	hsa-miR-5192
	hsa-miR-5193
	hsa-miR-5194
	hsa-miR-5195-3p
	hsa-miR-5196-3p
	hsa-miR-4524b-5p
	hsa-miR-4524b-3p
	hsa-miR-5571-3p
	hsa-miR-5100
	hsa-miR-5572
	hsa-miR-5579-5p
	hsa-miR-5579-3p
	hsa-miR-664b-5p
	hsa-miR-664b-3p
	hsa-miR-5580-5p
	hsa-miR-5581-3p
	hsa-miR-5584-5p
	hsa-miR-5584-3p
	hsa-miR-5585-5p
	hsa-miR-5586-5p
	hsa-miR-5586-3p
	hsa-miR-5587-5p
	hsa-miR-5587-3p
	hsa-miR-1295b-5p
	hsa-miR-1295b-3p
	hsa-miR-5588-5p
	hsa-miR-5588-3p
	hsa-miR-5589-5p
	hsa-miR-5591-3p
	hsa-miR-5680
	hsa-miR-5682
	hsa-miR-5683
	hsa-miR-5684
	hsa-miR-5685
	hsa-miR-5689
	hsa-miR-5691
	hsa-miR-5693
	hsa-miR-5698
	hsa-miR-5704
	hsa-miR-5705
	hsa-miR-5706
	hsa-miR-5739
	hsa-miR-5787
	hsa-miR-1199-5p
	hsa-miR-1199-3p
	hsa-miR-6068
	hsa-miR-6069
	hsa-miR-6072
	hsa-miR-6075
	hsa-miR-6076
	hsa-miR-6078
	hsa-miR-6079
	hsa-miR-6080
	hsa-miR-6081
	hsa-miR-6083
	hsa-miR-6084
	hsa-miR-6085
	hsa-miR-6086
	hsa-miR-6088
	hsa-miR-6090
	hsa-miR-6124
	hsa-miR-6125
	hsa-miR-6126
	hsa-miR-6127
	hsa-miR-6128
	hsa-miR-378j
	hsa-miR-6129
	hsa-miR-6131
	hsa-miR-6132
	hsa-miR-6133
	hsa-miR-6134
	hsa-miR-6165
	hsa-miR-6499-5p
	hsa-miR-6499-3p
	hsa-miR-6500-5p
	hsa-miR-6500-3p
	hsa-miR-6501-5p
	hsa-miR-6501-3p
	hsa-miR-6502-3p
	hsa-miR-6503-5p
	hsa-miR-6503-3p
	hsa-miR-6504-5p
	hsa-miR-6506-5p
	hsa-miR-6508-3p
	hsa-miR-6509-5p
	hsa-miR-6509-3p
	hsa-miR-6510-5p
	hsa-miR-6510-3p
	hsa-miR-6511a-5p
	hsa-miR-6511a-3p
	hsa-miR-6512-5p
	hsa-miR-6512-3p
	hsa-miR-6513-3p
	hsa-miR-6514-5p
	hsa-miR-6515-5p
	hsa-miR-6715b-3p
	hsa-miR-6717-5p
	hsa-miR-6511b-5p
	hsa-miR-6511b-3p
	hsa-miR-6719-3p
	hsa-miR-6720-5p
	hsa-miR-6720-3p
	hsa-miR-6721-5p
	hsa-miR-6722-3p
	hsa-miR-6724-5p
	hsa-miR-892c-3p
	hsa-miR-6726-5p
	hsa-miR-6726-3p
	hsa-miR-6727-5p
	hsa-miR-6727-3p
	hsa-miR-6728-5p
	hsa-miR-6729-5p
	hsa-miR-6729-3p
	hsa-miR-6730-5p
	hsa-miR-6730-3p
	hsa-miR-6731-5p
	hsa-miR-6731-3p
	hsa-miR-6732-5p
	hsa-miR-6732-3p
	hsa-miR-6734-5p
	hsa-miR-6734-3p
	hsa-miR-6735-5p
	hsa-miR-6735-3p
	hsa-miR-6736-5p
	hsa-miR-6736-3p
	hsa-miR-6737-5p
	hsa-miR-6738-5p
	hsa-miR-6740-5p
	hsa-miR-6741-5p
	hsa-miR-6741-3p
	hsa-miR-6742-5p
	hsa-miR-6742-3p
	hsa-miR-6743-5p
	hsa-miR-6743-3p
	hsa-miR-6744-5p
	hsa-miR-6744-3p
	hsa-miR-6745
	hsa-miR-6746-5p
	hsa-miR-6746-3p
	hsa-miR-6747-5p
	hsa-miR-6747-3p
	hsa-miR-6748-5p
	hsa-miR-6749-5p
	hsa-miR-6749-3p
	hsa-miR-6750-5p
	hsa-miR-6750-3p
	hsa-miR-6751-5p
	hsa-miR-6751-3p
	hsa-miR-6752-5p
	hsa-miR-6752-3p
	hsa-miR-6753-5p
	hsa-miR-6753-3p
	hsa-miR-6754-5p
	hsa-miR-6754-3p
	hsa-miR-6755-5p
	hsa-miR-6756-5p
	hsa-miR-6756-3p
	hsa-miR-6757-5p
	hsa-miR-6757-3p
	hsa-miR-6758-5p
	hsa-miR-6758-3p
	hsa-miR-6759-5p
	hsa-miR-6759-3p
	hsa-miR-6760-3p
	hsa-miR-6761-5p
	hsa-miR-6761-3p
	hsa-miR-6762-5p
	hsa-miR-6762-3p
	hsa-miR-6763-5p
	hsa-miR-6763-3p
	hsa-miR-6764-5p
	hsa-miR-6764-3p
	hsa-miR-6765-5p
	hsa-miR-6765-3p
	hsa-miR-6766-5p
	hsa-miR-6766-3p
	hsa-miR-6767-5p
	hsa-miR-6767-3p
	hsa-miR-6768-5p
	hsa-miR-6769a-5p
	hsa-miR-6770-5p
	hsa-miR-6771-5p
	hsa-miR-6771-3p
	hsa-miR-6772-5p
	hsa-miR-6772-3p
	hsa-miR-6773-5p
	hsa-miR-6773-3p
	hsa-miR-6774-5p
	hsa-miR-6774-3p
	hsa-miR-6775-5p
	hsa-miR-6775-3p
	hsa-miR-6776-5p
	hsa-miR-6777-5p
	hsa-miR-6777-3p
	hsa-miR-6778-3p
	hsa-miR-6779-5p
	hsa-miR-6779-3p
	hsa-miR-6780a-5p
	hsa-miR-6780a-3p
	hsa-miR-6781-3p
	hsa-miR-6782-5p
	hsa-miR-6782-3p
	hsa-miR-6783-5p
	hsa-miR-6783-3p
	hsa-miR-6784-5p
	hsa-miR-6784-3p
	hsa-miR-6785-5p
	hsa-miR-6785-3p
	hsa-miR-6786-5p
	hsa-miR-6787-5p
	hsa-miR-6787-3p
	hsa-miR-6788-5p
	hsa-miR-6788-3p
	hsa-miR-6789-5p
	hsa-miR-6789-3p
	hsa-miR-6790-5p
	hsa-miR-6790-3p
	hsa-miR-6791-5p
	hsa-miR-6791-3p
	hsa-miR-6792-5p
	hsa-miR-6792-3p
	hsa-miR-6793-5p
	hsa-miR-6793-3p
	hsa-miR-6794-5p
	hsa-miR-6794-3p
	hsa-miR-6795-5p
	hsa-miR-6795-3p
	hsa-miR-6796-5p
	hsa-miR-6796-3p
	hsa-miR-6797-3p
	hsa-miR-6798-5p
	hsa-miR-6798-3p
	hsa-miR-6799-5p
	hsa-miR-6799-3p
	hsa-miR-6800-5p
	hsa-miR-6800-3p
	hsa-miR-6801-5p
	hsa-miR-6801-3p
	hsa-miR-6802-5p
	hsa-miR-6802-3p
	hsa-miR-6803-5p
	hsa-miR-6803-3p
	hsa-miR-6804-5p
	hsa-miR-6804-3p
	hsa-miR-6805-5p
	hsa-miR-6806-5p
	hsa-miR-6806-3p
	hsa-miR-6807-5p
	hsa-miR-6807-3p
	hsa-miR-6808-5p
	hsa-miR-6808-3p
	hsa-miR-6809-3p
	hsa-miR-6810-5p
	hsa-miR-6810-3p
	hsa-miR-6811-5p
	hsa-miR-6811-3p
	hsa-miR-6812-5p
	hsa-miR-6812-3p
	hsa-miR-6813-5p
	hsa-miR-6813-3p
	hsa-miR-6814-5p
	hsa-miR-6814-3p
	hsa-miR-6815-5p
	hsa-miR-6815-3p
	hsa-miR-6816-5p
	hsa-miR-6817-5p
	hsa-miR-6817-3p
	hsa-miR-6818-3p
	hsa-miR-6819-5p
	hsa-miR-6819-3p
	hsa-miR-6820-5p
	hsa-miR-6820-3p
	hsa-miR-6821-5p
	hsa-miR-6822-5p
	hsa-miR-6822-3p
	hsa-miR-6823-5p
	hsa-miR-6823-3p
	hsa-miR-6824-5p
	hsa-miR-6824-3p
	hsa-miR-6825-5p
	hsa-miR-6825-3p
	hsa-miR-6826-5p
	hsa-miR-6827-5p
	hsa-miR-6827-3p
	hsa-miR-6828-5p
	hsa-miR-6828-3p
	hsa-miR-6829-5p
	hsa-miR-6829-3p
	hsa-miR-6830-5p
	hsa-miR-6830-3p
	hsa-miR-6831-5p
	hsa-miR-6832-5p
	hsa-miR-6832-3p
	hsa-miR-6833-5p
	hsa-miR-6833-3p
	hsa-miR-6834-5p
	hsa-miR-6834-3p
	hsa-miR-6835-5p
	hsa-miR-6835-3p
	hsa-miR-6780b-5p
	hsa-miR-6780b-3p
	hsa-miR-6837-5p
	hsa-miR-6837-3p
	hsa-miR-6838-5p
	hsa-miR-6838-3p
	hsa-miR-6839-5p
	hsa-miR-6839-3p
	hsa-miR-6840-5p
	hsa-miR-6841-5p
	hsa-miR-6841-3p
	hsa-miR-6842-5p
	hsa-miR-6842-3p
	hsa-miR-6843-3p
	hsa-miR-6845-5p
	hsa-miR-6845-3p
	hsa-miR-6846-5p
	hsa-miR-6847-5p
	hsa-miR-6847-3p
	hsa-miR-6848-5p
	hsa-miR-6849-5p
	hsa-miR-6849-3p
	hsa-miR-6850-5p
	hsa-miR-6850-3p
	hsa-miR-6851-5p
	hsa-miR-6852-5p
	hsa-miR-6852-3p
	hsa-miR-6853-5p
	hsa-miR-6854-5p
	hsa-miR-6854-3p
	hsa-miR-6855-5p
	hsa-miR-6855-3p
	hsa-miR-6856-5p
	hsa-miR-6856-3p
	hsa-miR-6857-5p
	hsa-miR-6857-3p
	hsa-miR-6858-5p
	hsa-miR-6858-3p
	hsa-miR-6859-5p
	hsa-miR-6859-3p
	hsa-miR-6769b-5p
	hsa-miR-6769b-3p
	hsa-miR-6860
	hsa-miR-6861-5p
	hsa-miR-6861-3p
	hsa-miR-6862-5p
	hsa-miR-6862-3p
	hsa-miR-6863
	hsa-miR-6864-5p
	hsa-miR-6864-3p
	hsa-miR-6865-5p
	hsa-miR-6865-3p
	hsa-miR-6866-5p
	hsa-miR-6866-3p
	hsa-miR-6867-5p
	hsa-miR-6867-3p
	hsa-miR-6868-5p
	hsa-miR-6869-5p
	hsa-miR-6869-3p
	hsa-miR-6870-5p
	hsa-miR-6870-3p
	hsa-miR-6871-5p
	hsa-miR-6872-5p
	hsa-miR-6872-3p
	hsa-miR-6873-5p
	hsa-miR-6873-3p
	hsa-miR-6875-5p
	hsa-miR-6875-3p
	hsa-miR-6876-5p
	hsa-miR-6876-3p
	hsa-miR-6877-3p
	hsa-miR-6878-3p
	hsa-miR-6879-5p
	hsa-miR-6879-3p
	hsa-miR-6880-5p
	hsa-miR-6881-3p
	hsa-miR-6882-5p
	hsa-miR-6882-3p
	hsa-miR-6883-5p
	hsa-miR-6883-3p
	hsa-miR-6884-5p
	hsa-miR-6886-5p
	hsa-miR-6886-3p
	hsa-miR-6887-5p
	hsa-miR-6887-3p
	hsa-miR-6888-5p
	hsa-miR-6888-3p
	hsa-miR-6889-5p
	hsa-miR-6889-3p
	hsa-miR-6890-5p
	hsa-miR-6890-3p
	hsa-miR-6891-5p
	hsa-miR-6891-3p
	hsa-miR-6892-3p
	hsa-miR-6893-5p
	hsa-miR-6893-3p
	hsa-miR-6894-5p
	hsa-miR-6895-5p
	hsa-miR-6895-3p
	hsa-miR-7106-5p
	hsa-miR-7106-3p
	hsa-miR-7107-5p
	hsa-miR-7107-3p
	hsa-miR-7108-5p
	hsa-miR-7108-3p
	hsa-miR-7109-5p
	hsa-miR-7109-3p
	hsa-miR-7110-5p
	hsa-miR-7110-3p
	hsa-miR-7111-3p
	hsa-miR-7112-3p
	hsa-miR-7113-5p
	hsa-miR-7113-3p
	hsa-miR-7114-5p
	hsa-miR-7114-3p
	hsa-miR-7150
	hsa-miR-7151-3p
	hsa-miR-7152-5p
	hsa-miR-7152-3p
	hsa-miR-7154-5p
	hsa-miR-7154-3p
	hsa-miR-7155-5p
	hsa-miR-7155-3p
	hsa-miR-7156-5p
	hsa-miR-7156-3p
	hsa-miR-7157-5p
	hsa-miR-7157-3p
	hsa-miR-7158-5p
	hsa-miR-7158-3p
	hsa-miR-7161-3p
	hsa-miR-7160-3p
	hsa-miR-7162-5p
	hsa-miR-7162-3p
	hsa-miR-7702
	hsa-miR-7703
	hsa-miR-7704
	hsa-miR-7705
	hsa-miR-7706
	hsa-miR-7843-5p
	hsa-miR-7843-3p
	hsa-miR-4433b-3p
	hsa-miR-1273h-5p
	hsa-miR-1273h-3p
	hsa-miR-7845-5p
	hsa-miR-7846-3p
	hsa-miR-7847-3p
	hsa-miR-7848-3p
	hsa-miR-7850-5p
	hsa-miR-7851-3p
	hsa-miR-7853-5p
	hsa-miR-7854-3p
	hsa-miR-7855-5p
	hsa-miR-7974
	hsa-miR-7977
	hsa-miR-7978
	hsa-miR-8052
	hsa-miR-8053
	hsa-miR-8055
	hsa-miR-8057
	hsa-miR-8059
	hsa-miR-8060
	hsa-miR-8063
	hsa-miR-8069
	hsa-miR-8070
	hsa-miR-8071
	hsa-miR-8072
	hsa-miR-8073
	hsa-miR-8074
	hsa-miR-8077
	hsa-miR-8079
	hsa-miR-8080
	hsa-miR-8081
	hsa-miR-8082
	hsa-miR-8083
	hsa-miR-8085
	hsa-miR-8086
	hsa-miR-8087
	hsa-miR-8088
	hsa-miR-8089
	hsa-miR-9500
	hsa-miR-9718
	hsa-miR-9898
	hsa-miR-9899
	hsa-miR-9901
	hsa-miR-9903
	hsa-miR-9985
	hsa-miR-1843
	hsa-miR-9986
	hsa-miR-10392-5p
	hsa-miR-10393-5p
	hsa-miR-10393-3p
	hsa-miR-10394-5p
	hsa-miR-10394-3p
	hsa-miR-10396a-5p
	hsa-miR-10396a-3p
	hsa-miR-10397-5p
	hsa-miR-10398-5p
	hsa-miR-10398-3p
	hsa-miR-10399-3p
	hsa-miR-10400-5p
	hsa-miR-10401-5p
	hsa-miR-10401-3p
	hsa-miR-10396b-5p
	hsa-miR-10396b-3p
	hsa-miR-10522-5p
	hsa-miR-10523-5p
	hsa-miR-10524-5p
	hsa-miR-10526-3p
	hsa-miR-11181-5p
	hsa-miR-11181-3p
	hsa-miR-11399
	hsa-miR-11401
	hsa-miR-3059-5p
	hsa-miR-3059-3p
	hsa-miR-3085-5p
	hsa-miR-3085-3p
	hsa-miR-6529-5p
	hsa-miR-9851-5p
	hsa-miR-9851-3p
	hsa-miR-12113
	hsa-miR-12114
	hsa-miR-12115
	hsa-miR-12117
	hsa-miR-12118
	hsa-miR-12119
	hsa-miR-12121
	hsa-miR-12122
	hsa-miR-12124
	hsa-miR-12125
	hsa-miR-12126
	hsa-miR-12127
	hsa-miR-12128
	hsa-miR-12129
	hsa-miR-12131
	hsa-miR-18a-5p
	hsa-miR-18a-3p
	hsa-miR-100-3p
	hsa-miR-196a-5p
	hsa-miR-181c-3p
	hsa-miR-203a-5p
	hsa-miR-210-5p
	hsa-miR-210-3p
	hsa-miR-211-3p
	hsa-miR-218-2-3p
	hsa-miR-30b-5p
	hsa-miR-132-3p
	hsa-miR-141-3p
	hsa-miR-142-3p
	hsa-miR-143-3p
	hsa-miR-125a-5p
	hsa-miR-126-3p
	hsa-miR-184
	hsa-miR-186-5p
	hsa-miR-193a-3p
	hsa-miR-200c-3p
	hsa-miR-106b-5p
	hsa-miR-34b-5p
	hsa-miR-362-5p
	hsa-miR-363-5p
	hsa-miR-373-5p
	hsa-miR-376a-5p
	hsa-miR-196b-3p
	hsa-miR-424-3p
	hsa-miR-18b-3p
	hsa-miR-449a
	hsa-miR-452-5p
	hsa-miR-491-3p
	hsa-miR-498-3p
	hsa-miR-526b-3p
	hsa-miR-523-3p
	hsa-miR-518f-5p
	hsa-miR-526a-3p
	hsa-miR-518c-5p
	hsa-miR-521
	hsa-miR-517c-3p
	hsa-miR-522-3p
	hsa-miR-509-3p
	hsa-miR-376a-2-5p
	hsa-miR-487b-5p
	hsa-miR-578
	hsa-miR-589-5p
	hsa-miR-589-3p
	hsa-miR-595
	hsa-miR-605-3p
	hsa-miR-613
	hsa-miR-619-5p
	hsa-miR-649
	hsa-miR-657
	hsa-miR-660-5p
	hsa-miR-1296-3p
	hsa-miR-1301-5p
	hsa-miR-1185-5p
	hsa-miR-769-5p
	hsa-miR-298
	hsa-miR-300
	hsa-miR-874-5p
	hsa-miR-541-5p
	hsa-miR-744-5p
	hsa-miR-208b-5p
	hsa-miR-938
	hsa-miR-1233-3p
	hsa-miR-1200
	hsa-miR-1203
	hsa-miR-1204
	hsa-miR-1205
	hsa-miR-1287-3p
	hsa-miR-1266-3p
	hsa-miR-1269a
	hsa-miR-1281
	hsa-miR-1292-3p
	hsa-miR-513b-5p
	hsa-miR-103b
	hsa-miR-1909-5p
	hsa-miR-2116-3p
	hsa-miR-2682-5p
	hsa-miR-2909
	hsa-miR-3127-3p
	hsa-miR-3131
	hsa-miR-378b
	hsa-miR-3136-5p
	hsa-miR-3136-3p
	hsa-miR-3159
	hsa-miR-3162-5p
	hsa-miR-3162-3p
	hsa-miR-3165
	hsa-miR-3173-3p
	hsa-miR-3194-3p
	hsa-miR-3195
	hsa-miR-514b-5p
	hsa-miR-3202
	hsa-miR-4293
	hsa-miR-4305
	hsa-miR-4308
	hsa-miR-4311
	hsa-miR-4317
	hsa-miR-4321
	hsa-miR-4258
	hsa-miR-4274
	hsa-miR-4279
	hsa-miR-4284
	hsa-miR-3616-5p
	hsa-miR-3619-5p
	hsa-miR-3663-5p
	hsa-miR-3666
	hsa-miR-3678-5p
	hsa-miR-3678-3p
	hsa-miR-3681-5p
	hsa-miR-3685
	hsa-miR-3910
	hsa-miR-3914
	hsa-miR-3922-5p
	hsa-miR-3927-5p
	hsa-miR-676-5p
	hsa-miR-3940-3p
	hsa-miR-374c-5p
	hsa-miR-4432
	hsa-miR-4437
	hsa-miR-4440
	hsa-miR-4442
	hsa-miR-4482-3p
	hsa-miR-4484
	hsa-miR-4491
	hsa-miR-4493
	hsa-miR-4531
	hsa-miR-4635
	hsa-miR-4644
	hsa-miR-4652-5p
	hsa-miR-4659b-3p
	hsa-miR-4693-5p
	hsa-miR-4699-3p
	hsa-miR-4705
	hsa-miR-4707-5p
	hsa-miR-4717-5p
	hsa-miR-4735-5p
	hsa-miR-4747-5p
	hsa-miR-4752
	hsa-miR-4761-3p
	hsa-miR-4774-5p
	hsa-miR-4796-3p
	hsa-miR-4804-3p
	hsa-miR-548ao-3p
	hsa-miR-5196-5p
	hsa-miR-5197-3p
	hsa-miR-5581-5p
	hsa-miR-548at-5p
	hsa-miR-5589-3p
	hsa-miR-548ax
	hsa-miR-5687
	hsa-miR-5699-3p
	hsa-miR-5703
	hsa-miR-6071
	hsa-miR-6074
	hsa-miR-6130
	hsa-miR-548az-5p
	hsa-miR-6505-3p
	hsa-miR-6513-5p
	hsa-miR-6514-3p
	hsa-miR-6515-3p
	hsa-miR-6715b-5p
	hsa-miR-6722-5p
	hsa-miR-6740-3p
	hsa-miR-6748-3p
	hsa-miR-6769a-3p
	hsa-miR-6776-3p
	hsa-miR-6781-5p
	hsa-miR-6797-5p
	hsa-miR-6805-3p
	hsa-miR-6809-5p
	hsa-miR-6826-3p
	hsa-miR-6848-3p
	hsa-miR-6868-3p
	hsa-miR-6871-3p
	hsa-miR-6877-5p
	hsa-miR-6878-5p
	hsa-miR-6880-3p
	hsa-miR-6881-5p
	hsa-miR-6884-3p
	hsa-miR-6885-5p
	hsa-miR-6885-3p
	hsa-miR-7111-5p
	hsa-miR-7161-5p
	hsa-miR-7160-5p
	hsa-miR-7515
	hsa-miR-8065
	hsa-miR-8075
	hsa-miR-9900
	hsa-miR-10392-3p
	hsa-miR-10395-3p
	hsa-miR-10400-3p
	hsa-miR-11400
	hsa-miR-12116
	hsa-miR-12120
	hsa-let-7f-5p
	hsa-let-7f-2-3p
	hsa-miR-30a-3p
	hsa-miR-96-3p
	hsa-miR-30d-5p
	hsa-miR-139-3p
	hsa-miR-183-3p
	hsa-miR-221-3p
	hsa-miR-27b-5p
	hsa-miR-130a-5p
	hsa-miR-140-5p
	hsa-miR-191-3p
	hsa-miR-194-5p
	hsa-miR-371a-3p
	hsa-miR-379-5p
	hsa-miR-383-3p
	hsa-miR-346
	hsa-miR-18b-5p
	hsa-miR-448
	hsa-miR-409-3p
	hsa-miR-450a-2-3p
	hsa-miR-616-5p
	hsa-miR-33b-5p
	hsa-miR-1264
	hsa-miR-668-3p
	hsa-miR-454-3p
	hsa-miR-874-3p
	hsa-miR-1178-3p
	hsa-miR-1182
	hsa-miR-548e-5p
	hsa-miR-548k
	hsa-miR-664a-5p
	hsa-miR-513b-3p
	hsa-miR-1321
	hsa-miR-1322
	hsa-miR-2861
	hsa-miR-3117-5p
	hsa-miR-3119
	hsa-miR-3139
	hsa-miR-3169
	hsa-miR-514b-3p
	hsa-miR-4315
	hsa-miR-4269
	hsa-miR-4277
	hsa-miR-3713
	hsa-miR-3714
	hsa-miR-3927-3p
	hsa-miR-3936
	hsa-miR-4421
	hsa-miR-4435
	hsa-miR-4441
	hsa-miR-4456
	hsa-miR-4463
	hsa-miR-4509
	hsa-miR-4648
	hsa-miR-4694-5p
	hsa-miR-4707-3p
	hsa-miR-203b-5p
	hsa-miR-3529-5p
	hsa-miR-4724-5p
	hsa-miR-4741
	hsa-miR-4766-5p
	hsa-miR-4768-5p
	hsa-miR-4780
	hsa-miR-4781-3p
	hsa-miR-4789-5p
	hsa-miR-5003-5p
	hsa-miR-5011-3p
	hsa-miR-548as-5p
	hsa-miR-5694
	hsa-miR-6077
	hsa-miR-6082
	hsa-miR-6505-5p
	hsa-miR-6507-3p
	hsa-miR-6738-3p
	hsa-miR-6770-3p
	hsa-miR-6818-5p
	hsa-miR-6821-3p
	hsa-miR-6846-3p
	hsa-miR-6894-3p
	hsa-miR-7112-5p
	hsa-miR-7151-5p
	hsa-miR-7159-5p
	hsa-miR-7856-5p
	hsa-miR-7976
	hsa-miR-8056
	hsa-miR-10226
	hsa-miR-9983-3p
	hsa-miR-12136
	hsa-miR-26a-1-3p
	hsa-miR-199a-3p
	hsa-miR-199b-3p
	hsa-miR-181a-3p
	hsa-miR-219a-1-3p
	hsa-miR-138-2-3p
	hsa-miR-146a-3p
	hsa-miR-373-3p
	hsa-miR-382-5p
	hsa-miR-338-3p
	hsa-miR-487a-3p
	hsa-miR-597-3p
	hsa-miR-641
	hsa-miR-658
	hsa-miR-762
	hsa-miR-1910-5p
	hsa-miR-718
	hsa-miR-3163
	hsa-miR-3166
	hsa-miR-4323
	hsa-miR-4324
	hsa-miR-3681-3p
	hsa-miR-4678
	hsa-miR-4684-5p
	hsa-miR-4693-3p
	hsa-miR-4715-3p
	hsa-miR-3529-3p
	hsa-miR-4520-2-3p
	hsa-miR-4729
	hsa-miR-4770
	hsa-miR-5000-3p
	hsa-miR-5189-3p
	hsa-miR-5690
	hsa-miR-5692a
	hsa-miR-6089
	hsa-miR-6718-5p
	hsa-miR-6778-5p
	hsa-miR-6840-3p
	hsa-miR-6874-3p
	hsa-miR-6516-5p
	hsa-miR-7844-5p
	hsa-let-7b-3p
	hsa-let-7f-1-3p
	hsa-miR-10a-5p
	hsa-miR-215-3p
	hsa-miR-122-3p
	hsa-miR-136-3p
	hsa-miR-451a
	hsa-miR-495-5p
	hsa-miR-564
	hsa-miR-576-5p
	hsa-miR-645
	hsa-miR-548e-3p
	hsa-miR-1306-5p
	hsa-miR-1307-5p
	hsa-miR-1825
	hsa-miR-3116
	hsa-miR-3150a-5p
	hsa-miR-3152-5p
	hsa-miR-4301
	hsa-miR-4310
	hsa-miR-4275
	hsa-miR-3688-5p
	hsa-miR-3925-5p
	hsa-miR-3938
	hsa-miR-4418
	hsa-miR-4490
	hsa-miR-4501
	hsa-miR-3975
	hsa-miR-4680-5p
	hsa-miR-4714-5p
	hsa-miR-371b-5p
	hsa-miR-499b-5p
	hsa-miR-4762-3p
	hsa-miR-1245b-5p
	hsa-miR-5092
	hsa-miR-5681b
[truncated: 31 more rows]
