# Supplementary material for: Comprehensive bioinformatics analysis and experimental validation revealed that high-expression ARHGAP9 affected the progression of gastric cancer
Source: Research Square preprint supplement (doi:10.21203/rs.3.rs-7311091/v1), 2025-12-05
Supplement: Supplementary file 3 [file 7531d557c368b32b97b1bfaf.xlsx]

## Sheet: Sheet1
id	baseMean	log2FoldChange	lfcSE	stat	pvalue	padj	gene_name	gene_type
ENSG00000000003.15	2685.3	-0.157616	0.107475	-1.46653	0.142503	0.27128	TSPAN6	protein_coding
ENSG00000000005.6	5.86245	0.740012	0.256905	2.88048	0.00397064	0.0149015	TNMD	protein_coding
ENSG00000000419.13	2936.33	-0.307906	0.0587803	-5.23825	1.62103e-07	2.04585e-06	DPM1	protein_coding
ENSG00000000457.14	968.511	-0.124057	0.047251	-2.62549	0.0086524	0.0286461	SCYL3	protein_coding
ENSG00000000460.17	585.22	-0.21219	0.0690417	-3.07336	0.00211664	0.00872543	C1orf112	protein_coding
ENSG00000203785.9	155.224	-4.22889	0.53444	-7.91275	2.51758e-15	8.93187e-14	SPRR2E	protein_coding
ENSG00000000971.16	4594.12	0.91571	0.115844	7.90469	2.68604e-15	9.48168e-14	CFH	protein_coding
ENSG00000001036.14	3974.74	-0.32964	0.0615314	-5.35727	8.44874e-08	1.13406e-06	FUCA2	protein_coding
ENSG00000001084.13	2980.6	-0.301991	0.0635519	-4.75187	2.01542e-06	1.98152e-05	GCLC	protein_coding
ENSG00000001167.14	2184.9	-0.107252	0.0660454	-1.62391	0.104395	0.213814	NFYA	protein_coding
ENSG00000001460.18	558.49	-0.237289	0.0589663	-4.02415	5.71822e-05	0.000386037	STPG1	protein_coding
ENSG00000001461.17	2535.8	-0.10545	0.0609485	-1.73015	0.0836033	0.180492	NIPAL3	protein_coding
ENSG00000001497.18	2327.71	-0.116727	0.0510298	-2.28743	0.0221707	0.0623202	LAS1L	protein_coding
ENSG00000001561.7	1842.69	-0.212335	0.0896636	-2.36813	0.0178782	0.0522571	ENPP4	protein_coding
ENSG00000001617.12	3529.33	-0.224891	0.0963558	-2.33396	0.0195978	0.0563496	SEMA3F	protein_coding
ENSG00000001626.16	3702.62	0.0088058	0.189662	0.046429	0.962968	0.98032	CFTR	protein_coding
ENSG00000001629.10	4969.57	-0.135721	0.0807305	-1.68116	0.0927323	0.195601	ANKIB1	protein_coding
ENSG00000001630.17	326.37	-0.415642	0.131237	-3.16711	0.00153964	0.00664586	CYP51A1	protein_coding
ENSG00000001631.16	500.096	-0.254211	0.0831249	-3.05819	0.0022268	0.00911997	KRIT1	protein_coding
ENSG00000002016.18	591.891	-0.0342476	0.0622135	-0.550486	0.581986	0.728693	RAD52	protein_coding
ENSG00000002330.14	732.458	-0.118481	0.0749534	-1.58073	0.113939	0.228675	BAD	protein_coding
ENSG00000002549.12	7914.93	0.737853	0.0762646	9.6749	3.85454e-22	2.09354e-20	LAP3	protein_coding
ENSG00000002586.20	9288.5	0.0740052	0.0775132	0.954742	0.339708	0.508987	CD99	protein_coding
ENSG00000002586.20_PAR_Y	0						CD99	protein_coding
ENSG00000002587.10	2042.4	0.22912	0.124598	1.83887	0.0659341	0.149794	HS3ST1	protein_coding
ENSG00000002726.21	10173.8	-0.274615	0.152584	-1.79976	0.0718983	0.160365	AOC1	protein_coding
ENSG00000002745.13	33.5724	-0.0656833	0.181912	-0.361072	0.718045	0.829232	WNT16	protein_coding
ENSG00000002746.15	90.941	0.117615	0.126831	0.927335	0.353753	0.523234	HECW1	protein_coding
ENSG00000002822.15	53.0749	0.397388	0.109778	3.61991	0.000294703	0.00160578	MAD1L1	protein_coding
ENSG00000002834.18	21933.2	-0.198863	0.0712402	-2.79145	0.00524728	0.0188244	LASP1	protein_coding
ENSG00000002919.15	1232.04	0.0564308	0.0389517	1.44874	0.147411	0.278356	SNX11	protein_coding
ENSG00000002933.9	10382.8	-0.385751	0.12649	-3.04966	0.00229103	0.00934955	TMEM176A	protein_coding
ENSG00000003056.8	3327.9	0.193316	0.0671036	2.88086	0.00396594	0.014886	M6PR	protein_coding
ENSG00000003096.14	385.252	0.348939	0.161732	2.15751	0.0309662	0.0820032	KLHL13	protein_coding
ENSG00000003137.8	358.312	0.371764	0.153041	2.42918	0.0151332	0.0454651	CYP26B1	protein_coding
ENSG00000003147.19	2460.53	-0.560456	0.0785247	-7.13731	9.51735e-13	2.68384e-11	ICA1	protein_coding
ENSG00000003249.15	1923.39	-0.623345	0.124643	-5.00104	5.70229e-07	6.35303e-06	DBNDD1	protein_coding
ENSG00000003393.15	1844.3	-0.127196	0.0475438	-2.67535	0.00746507	0.0252711	ALS2	protein_coding
ENSG00000003400.15	2873.65	0.195336	0.0865439	2.25708	0.0240031	0.0665021	CASP10	protein_coding
ENSG00000003402.20	7493.94	0.402071	0.0525031	7.65805	1.88785e-14	6.2389e-13	CFLAR	protein_coding
ENSG00000003436.16	3415.05	-0.359594	0.120491	-2.9844	0.00284138	0.0112196	TFPI	protein_coding
ENSG00000003509.16	730.522	-0.161534	0.0372586	-4.33549	1.45435e-05	0.00011445	NDUFAF7	protein_coding
ENSG00000003756.17	3161.41	0.0696381	0.0516831	1.34741	0.17785	0.320478	RBM5	protein_coding
ENSG00000003987.14	110.542	-0.167067	0.10081	-1.65724	0.0974709	0.203003	MTMR7	protein_coding
ENSG00000003989.18	1861.89	-0.251815	0.186718	-1.34864	0.177452	0.319974	SLC7A2	protein_coding
ENSG00000004059.11	4170.12	-0.198117	0.0618163	-3.20493	0.00135095	0.00594134	ARF5	protein_coding
ENSG00000004139.14	488.899	0.126912	0.0778358	1.63051	0.102993	0.21154	SARM1	protein_coding
ENSG00000004142.12	6752.01	-0.244855	0.0484975	-5.04882	4.4454e-07	5.09905e-06	POLDIP2	protein_coding
ENSG00000004399.13	8952.95	0.380957	0.0860495	4.42718	9.54733e-06	7.84054e-05	PLXND1	protein_coding
ENSG00000004455.17	6404.84	-0.136427	0.0452421	-3.01549	0.00256568	0.0102777	AK2	protein_coding
ENSG00000185269.12	1909.66	-3.60136	0.259038	-13.9028	6.08749e-44	8.46195e-42	NOTUM	protein_coding
ENSG00000004478.8	6887.72	-0.257071	0.084612	-3.03823	0.00237972	0.00964611	FKBP4	protein_coding
ENSG00000004487.17	5141.62	-0.170158	0.055503	-3.06574	0.00217129	0.00892755	KDM1A	protein_coding
ENSG00000004534.15	3172.89	0.0233249	0.0542518	0.429938	0.667241	0.794125	RBM6	protein_coding
ENSG00000004660.15	516.952	-0.204117	0.0782141	-2.60973	0.00906145	0.029776	CAMKK1	protein_coding
ENSG00000004700.16	1142.43	0.429941	0.0782022	5.49782	3.84522e-08	5.54397e-07	RECQL	protein_coding
ENSG00000004766.17	1720.78	-0.0213446	0.0754115	-0.283042	0.777145	0.868282	VPS50	protein_coding
ENSG00000004776.13	4212.82	0.890139	0.238745	3.72842	0.000192688	0.00111235	HSPB6	protein_coding
ENSG00000004777.18	588.993	-0.06854	0.0898973	-0.762426	0.445806	0.613337	ARHGAP33	protein_coding
ENSG00000004779.10	3925.43	-0.364782	0.0606574	-6.0138	1.8122e-09	3.30522e-08	NDUFAB1	protein_coding
ENSG00000004799.8	4947.6	0.413789	0.174563	2.37042	0.0177678	0.0520055	PDK4	protein_coding
ENSG00000004809.14	11.6954	0.680141	0.180333	3.77159	0.000162208	0.000959712	SLC22A16	protein_coding
ENSG00000004838.14	34.9099	-0.0180654	0.116779	-0.154698	0.877059	0.931495	ZMYND10	protein_coding
ENSG00000004846.16	26.548	0.636851	0.211189	3.01554	0.00256519	0.0102766	ABCB5	protein_coding
ENSG00000004848.8	88.5758	-0.533097	0.225196	-2.36726	0.0179201	0.0523456	ARX	protein_coding
ENSG00000004864.14	2586.53	-0.400591	0.0753571	-5.3159	1.06134e-07	1.39755e-06	SLC25A13	protein_coding
ENSG00000004866.22	1779	-0.270912	0.0643319	-4.21116	2.5406e-05	0.00018811	ST7	protein_coding
ENSG00000004897.12	3762.68	0.0393124	0.0419272	0.937635	0.348432	0.517651	CDC27	protein_coding
ENSG00000004939.15	19.0723	0.258837	0.195179	1.32615	0.18479	0.329628	SLC4A1	protein_coding
ENSG00000004948.16	17.2241	-0.166254	0.161838	-1.02728	0.304286	0.471007	CALCR	protein_coding
ENSG00000004961.15	1914.56	-0.0725077	0.0503041	-1.44139	0.149476	0.281374	HCCS	protein_coding
ENSG00000004975.12	1860.77	0.0568044	0.0524603	1.08281	0.278894	0.443032	DVL2	protein_coding
ENSG00000005001.10	2155.89	-0.694615	0.13257	-5.23963	1.60903e-07	2.03383e-06	PRSS22	protein_coding
ENSG00000005007.13	9299.1	0.0197596	0.0547336	0.361014	0.718089	0.829258	UPF1	protein_coding
ENSG00000005020.13	3571.68	-0.0564384	0.0652447	-0.865028	0.387024	0.556817	SKAP2	protein_coding
ENSG00000005022.6	19568.5	-0.242532	0.0711778	-3.40741	0.000655825	0.00319116	SLC25A5	protein_coding
ENSG00000005059.16	1015.25	0.5385	0.0771118	6.98336	2.88197e-12	7.7284e-11	MCUB	protein_coding
ENSG00000005073.6	285.808	-0.763889	0.205101	-3.72446	0.000195732	0.00112742	HOXA11	protein_coding
ENSG00000005075.15	2901.65	-0.51886	0.0696301	-7.45166	9.21718e-14	2.85796e-12	POLR2J	protein_coding
ENSG00000005100.13	1769.08	-0.062642	0.0525909	-1.19112	0.233607	0.39036	DHX33	protein_coding
ENSG00000005108.16	383.171	0.434829	0.116256	3.74028	0.000183816	0.0010669	THSD7A	protein_coding
ENSG00000005156.12	2032.28	-0.19184	0.0546943	-3.50749	0.000452347	0.00232665	LIG3	protein_coding
ENSG00000005175.10	2024.56	-0.150853	0.0486675	-3.09967	0.00193734	0.00809686	RPAP3	protein_coding
ENSG00000005187.12	908.376	-0.135561	0.141391	-0.958768	0.337676	0.507106	ACSM3	protein_coding
ENSG00000005189.20	380.421	-0.174682	0.0795901	-2.19477	0.02818	0.0759478	REXO5	protein_coding
ENSG00000005194.15	2437.76	-0.177365	0.0517984	-3.42413	0.000616763	0.00303224	CIAPIN1	protein_coding
ENSG00000005206.17	3450.28	-0.336848	0.0602955	-5.58662	2.31528e-08	3.4682e-07	SPPL2B	protein_coding
ENSG00000005238.20	1579.8	-0.0275176	0.0792792	-0.347097	0.728518	0.836029	FAM214B	protein_coding
ENSG00000005243.10	471.854	0.233572	0.119973	1.94688	0.0515495	0.123162	COPZ2	protein_coding
ENSG00000005249.13	926.96	0.772944	0.134761	5.73565	9.71372e-09	1.55394e-07	PRKAR2B	protein_coding
ENSG00000005302.19	2096.08	0.15059	0.0455263	3.30776	0.000940462	0.00434578	MSL3	protein_coding
ENSG00000005339.15	10600.4	0.152993	0.0492347	3.10742	0.00188729	0.0079193	CREBBP	protein_coding
ENSG00000005379.17	584.651	-0.0830141	0.131929	-0.629234	0.529196	0.685546	TSPOAP1	protein_coding
ENSG00000005381.8	14.5348	0.448636	0.130686	3.43293	0.000597087	0.00294906	MPO	protein_coding
ENSG00000005421.9	48.059	-0.943943	0.239322	-3.94424	8.00542e-05	0.000517921	PON1	protein_coding
ENSG00000005436.14	1065.63	-0.203953	0.0455356	-4.47899	7.49987e-06	6.33569e-05	GCFC2	protein_coding
ENSG00000005448.17	591.607	-0.208777	0.0814838	-2.56219	0.0104015	0.0333816	WDR54	protein_coding
ENSG00000005469.12	799.934	0.0633496	0.0962632	0.658088	0.510482	0.670022	CROT	protein_coding
ENSG00000005471.19	98.7972	0.668128	0.111935	5.96892	2.38834e-09	4.27211e-08	ABCB4	protein_coding
ENSG00000005483.21	7766.75	-0.101444	0.0548405	-1.84979	0.0643432	0.146862	KMT2E	protein_coding
ENSG00000005486.17	7575	-0.410823	0.0700839	-5.86188	4.57669e-09	7.82794e-08	RHBDD2	protein_coding
ENSG00000005513.10	278.794	-0.297533	0.187213	-1.58928	0.111998	0.225505	SOX8	protein_coding
ENSG00000005700.15	5445.69	-0.133552	0.069482	-1.9221	0.0545928	0.1289	IBTK	protein_coding
ENSG00000005801.18	2085.73	-0.318583	0.0684299	-4.65561	3.2302e-06	3.01903e-05	ZNF195	protein_coding
ENSG00000005810.18	4654.73	0.391879	0.0561291	6.98174	2.91542e-12	7.80959e-11	MYCBP2	protein_coding
ENSG00000005812.11	2821.85	-0.0924812	0.0488322	-1.89386	0.0582442	0.135807	FBXL3	protein_coding
ENSG00000196805.7	4.98588	-3.31966	0.793761	-4.18219	2.88718e-05	0.000210727	SPRR2B	protein_coding
ENSG00000005882.12	1950.76	-0.0893984	0.0732845	-1.21988	0.22251	0.376976	PDK2	protein_coding
ENSG00000005884.18	16434.1	-0.125014	0.103474	-1.20816	0.226986	0.382282	ITGA3	protein_coding
ENSG00000005889.16	2638.44	0.182015	0.0551035	3.30314	0.000956086	0.00440929	ZFX	protein_coding
ENSG00000005893.16	11069.8	-0.0430567	0.0574452	-0.749527	0.453539	0.620731	LAMP2	protein_coding
ENSG00000005961.19	33.9487	0.157359	0.1323	1.18941	0.234278	0.391256	ITGA2B	protein_coding
ENSG00000186847.6	453.463	-3.2978	0.314014	-10.5021	8.44799e-26	5.52804e-24	KRT14	protein_coding
ENSG00000006007.12	5212.14	-0.0963313	0.0523327	-1.84075	0.0656584	0.149289	GDE1	protein_coding
ENSG00000006015.18	1439.19	0.000854189	0.0583673	0.0146347	0.988324	0.99385	REX1BD	protein_coding
ENSG00000006016.11	190.376	0.802868	0.19259	4.1688	3.06211e-05	0.000221948	CRLF1	protein_coding
ENSG00000006025.12	2255.08	-0.190477	0.0969374	-1.96495	0.0494197	0.119319	OSBPL7	protein_coding
ENSG00000006042.12	3927.03	0.0223123	0.0915692	0.243666	0.807489	0.887892	TMEM98	protein_coding
ENSG00000006047.13	843.551	-0.315335	0.169598	-1.85931	0.0629833	0.144509	YBX2	protein_coding
ENSG00000006059.4	2.84008	-0.879942	0.417438	-2.10796	0.0350347	0.0906217	KRT33A	protein_coding
ENSG00000006062.17	1468.28	0.468999	0.0761971	6.15508	7.50407e-10	1.4601e-08	MAP3K14	protein_coding
ENSG00000006071.15	61.3049	-0.779074	0.196475	-3.96525	7.33184e-05	0.000479959	ABCC8	protein_coding
ENSG00000006116.4	2.07345	0.418093	0.312082	1.33969	0.180346	0.323827	CACNG3	protein_coding
ENSG00000006118.15	2737.38	-0.0916989	0.103162	-0.888885	0.374065	0.544254	TMEM132A	protein_coding
ENSG00000006125.18	21367.2	-0.0398517	0.0592578	-0.672515	0.501256	0.66201	AP2B1	protein_coding
ENSG00000204542.3	61.5188	-3.28173	0.34972	-9.3839	6.35785e-21	3.23534e-19	C6orf15	protein_coding
ENSG00000006194.10	1584.64	-0.0344725	0.0436115	-0.790446	0.429267	0.59728	ZNF263	protein_coding
ENSG00000167754.13	51.6277	-3.17118	0.347003	-9.13878	6.31608e-20	3.05007e-18	KLK5	protein_coding
ENSG00000006282.21	3383.77	0.00558309	0.0683926	0.0816329	0.934939	0.964557	SPATA20	protein_coding
ENSG00000006283.18	33.7282	0.604342	0.149225	4.04988	5.12448e-05	0.000350181	CACNA1G	protein_coding
ENSG00000006327.14	4400.64	-0.364351	0.106639	-3.41668	0.000633897	0.00310341	TNFRSF12A	protein_coding
ENSG00000006432.15	1313.07	-0.504176	0.0842035	-5.98758	2.1298e-09	3.84057e-08	MAP3K9	protein_coding
ENSG00000006451.8	4345.95	-0.261709	0.0498085	-5.2543	1.48588e-07	1.89178e-06	RALA	protein_coding
ENSG00000006453.14	6763.83	-0.437767	0.101087	-4.33059	1.48708e-05	0.00011669	BAIAP2L1	protein_coding
ENSG00000006459.11	2924.7	-0.0612653	0.0752201	-0.814481	0.41537	0.58447	KDM7A	protein_coding
ENSG00000006468.14	863.527	-0.235913	0.118948	-1.98333	0.0473311	0.115358	ETV1	protein_coding
ENSG00000006530.18	1551.7	-0.119179	0.0520122	-2.29136	0.0219428	0.0618032	AGK	protein_coding
ENSG00000006534.16	3601.84	-0.340578	0.114456	-2.97563	0.00292384	0.0115073	ALDH3B1	protein_coding
ENSG00000006555.11	2678.55	-0.393602	0.112466	-3.49975	0.000465688	0.0023853	TTC22	protein_coding
ENSG00000006576.16	1453.81	0.180339	0.0550745	3.27446	0.00105865	0.00482706	PHTF2	protein_coding
ENSG00000006606.9	76.5883	0.366538	0.174845	2.09636	0.0360504	0.0927033	CCL26	protein_coding
ENSG00000006607.14	4562.46	-0.092942	0.0553325	-1.6797	0.0930154	0.196005	FARP2	protein_coding
ENSG00000006611.17	4680.94	-0.373557	0.109841	-3.40089	0.000671667	0.00325021	USH1C	protein_coding
ENSG00000006625.18	1503.18	-0.602554	0.072296	-8.33454	7.77997e-17	3.07499e-15	GGCT	protein_coding
ENSG00000006634.8	1549.17	-0.420825	0.0779429	-5.39915	6.69589e-08	9.18315e-07	DBF4	protein_coding
ENSG00000006638.13	253.366	0.347428	0.092258	3.76583	0.000165996	0.00097848	TBXA2R	protein_coding
ENSG00000006652.15	580.569	-0.477504	0.0773031	-6.17703	6.53172e-10	1.28257e-08	IFRD1	protein_coding
ENSG00000006659.13	3.58553	0.057542	0.467258	0.123148	0.90199	0.946579	LGALS14	protein_coding
ENSG00000006695.12	1284.88	-0.0313551	0.0511638	-0.612837	0.539984	0.693864	COX10	protein_coding
ENSG00000006704.11	3001.99	-0.494541	0.0702749	-7.03722	1.96107e-12	5.35517e-11	GTF2IRD1	protein_coding
ENSG00000006712.15	3027.3	-0.0807823	0.0561494	-1.4387	0.150235	0.282502	PAF1	protein_coding
ENSG00000006715.16	3692.15	-0.0695026	0.049696	-1.39855	0.161947	0.298613	VPS41	protein_coding
ENSG00000006740.17	1017.29	0.233648	0.106721	2.18933	0.0285726	0.0768222	ARHGAP44	protein_coding
ENSG00000006744.19	4274.18	0.0534305	0.0500051	1.0685	0.285294	0.450018	ELAC2	protein_coding
ENSG00000006747.15	880.309	-0.724267	0.154666	-4.68279	2.82993e-06	2.68263e-05	SCIN	protein_coding
ENSG00000006756.16	3333.68	-0.276068	0.0752978	-3.66635	0.000246041	0.00137441	ARSD	protein_coding
ENSG00000006757.12	882.056	-0.276739	0.0989466	-2.79685	0.00516027	0.0185632	PNPLA4	protein_coding
ENSG00000006788.14	21.6517	0.457113	0.180706	2.52959	0.0114195	0.0361253	MYH13	protein_coding
ENSG00000006831.10	5083.59	-0.266925	0.0662551	-4.02875	5.60754e-05	0.000379293	ADIPOR2	protein_coding
ENSG00000006837.12	29.0401	-0.229253	0.0794246	-2.88642	0.0038965	0.0146556	CDKL3	protein_coding
ENSG00000007001.13	8.41414	-0.0190348	0.145707	-0.130637	0.896062	0.943064	UPP2	protein_coding
ENSG00000007038.11	774.518	-0.771304	0.251868	-3.06233	0.00219619	0.00901111	PRSS21	protein_coding
ENSG00000007047.15	2417	0.00457776	0.0577459	0.0792743	0.936814	0.965621	MARK4	protein_coding
ENSG00000007062.12	5814.17	-0.495264	0.16771	-2.9531	0.00314602	0.0122388	PROM1	protein_coding
ENSG00000007080.11	2852.46	0.0166964	0.0676755	0.246712	0.805131	0.886352	CCDC124	protein_coding
ENSG00000007168.14	6182.66	0.108195	0.0405597	2.66755	0.00764066	0.0257628	PAFAH1B1	protein_coding
ENSG00000007171.18	1972.74	0.00288642	0.238878	0.0120833	0.990359	0.994785	NOS2	protein_coding
ENSG00000007174.18	45.4313	0.246386	0.18	1.36881	0.171057	0.311202	DNAH9	protein_coding
ENSG00000007202.15	8894.01	0.00069908	0.056809	0.0123058	0.990182	0.994689	KIAA0100	protein_coding
ENSG00000007216.15	611.021	-0.217536	0.29513	-0.737087	0.461069	0.627442	SLC13A2	protein_coding
ENSG00000007255.10	853.765	-0.398454	0.0858139	-4.64324	3.42989e-06	3.18389e-05	TRAPPC6A	protein_coding
ENSG00000087128.10	44.1305	-2.96523	0.316672	-9.36374	7.69634e-21	3.90838e-19	TMPRSS11E	protein_coding
ENSG00000007306.15	2253.77	-0.159007	0.250043	-0.635919	0.524829	0.681995	CEACAM7	protein_coding
ENSG00000163631.17	406.699	-2.91332	0.322966	-9.02051	1.87218e-19	8.7823e-18	ALB	protein_coding
ENSG00000007314.12	32.0276	0.898794	0.163564	5.49506	3.90586e-08	5.62316e-07	SCN4A	protein_coding
ENSG00000007341.19	691.963	-0.100653	0.0353426	-2.84792	0.00440056	0.0162265	ST7L	protein_coding
ENSG00000007350.17	109.434	-0.896344	0.278089	-3.22323	0.00126753	0.00562523	TKTL1	protein_coding
ENSG00000007372.24	121.586	0.342208	0.2277	1.50289	0.132867	0.257194	PAX6	protein_coding
ENSG00000007376.8	1778.49	-0.168157	0.072638	-2.31501	0.0206126	0.0587185	RPUSD1	protein_coding
ENSG00000007384.15	2454.38	-0.155504	0.0703975	-2.20894	0.027179	0.0736792	RHBDF1	protein_coding
ENSG00000007392.17	1479.74	-0.038275	0.0529302	-0.723122	0.469605	0.634966	LUC7L	protein_coding
ENSG00000007402.12	236.135	0.143729	0.143966	0.998352	0.318109	0.486263	CACNA2D2	protein_coding
ENSG00000007516.14	288.669	-0.354685	0.137598	-2.5777	0.00994604	0.0321694	BAIAP3	protein_coding
ENSG00000007520.4	1559.77	0.00188867	0.0682438	0.0276753	0.977921	0.988711	TSR3	protein_coding
ENSG00000007541.17	1774.71	-0.0933186	0.0588448	-1.58584	0.112775	0.226785	PIGQ	protein_coding
ENSG00000007545.16	839.344	0.0174215	0.0509892	0.34167	0.732599	0.838878	CRAMP1	protein_coding
ENSG00000007866.22	3626.13	-0.0974764	0.069688	-1.39875	0.161887	0.298524	TEAD3	protein_coding
ENSG00000007908.16	575.869	0.597992	0.162774	3.67375	0.000239014	0.00133865	SELE	protein_coding
ENSG00000007923.16	2037.44	-0.0467104	0.0598168	-0.780891	0.434866	0.603034	DNAJC11	protein_coding
ENSG00000007933.13	352.47	0.307184	0.123478	2.48777	0.0128548	0.039771	FMO3	protein_coding
ENSG00000007944.15	2118.46	0.00692405	0.0670611	0.10325	0.917765	0.955311	MYLIP	protein_coding
ENSG00000007952.18	631.472	-0.202414	0.227436	-0.889985	0.373474	0.543661	NOX1	protein_coding
ENSG00000007968.7	966.471	0.0904568	0.105512	0.857314	0.391271	0.561135	E2F2	protein_coding
ENSG00000008018.9	7990.93	-0.234699	0.0532718	-4.4057	1.05444e-05	8.56786e-05	PSMB1	protein_coding
ENSG00000008056.14	222.351	-0.243955	0.143489	-1.70017	0.0890987	0.189639	SYN1	protein_coding
ENSG00000008083.14	2045.59	0.121281	0.063638	1.90579	0.0566774	0.13284	JARID2	protein_coding
ENSG00000008086.13	1307.51	0.182147	0.0814769	2.23556	0.0253805	0.0696092	CDKL5	protein_coding
ENSG00000008118.10	44.6117	0.502053	0.0936648	5.36011	8.31731e-08	1.11886e-06	CAMK1G	protein_coding
ENSG00000008128.23	63.1067	-0.271878	0.0781643	-3.47829	0.000504624	0.00255469	CDK11A	protein_coding
ENSG00000008130.15	4703.75	-0.0141596	0.0531373	-0.266471	0.789877	0.876214	NADK	protein_coding
ENSG00000008196.13	7.03836	-0.373749	0.266902	-1.40032	0.161417	0.297893	TFAP2B	protein_coding
ENSG00000008197.5	3.72559	0.284278	0.353902	0.803266	0.421821	0.590391	TFAP2D	protein_coding
ENSG00000008226.20	69.791	0.0613974	0.096474	0.636414	0.524507	0.681731	DLEC1	protein_coding
ENSG00000008256.16	2749.9	0.179424	0.0692332	2.59159	0.00955325	0.0311178	CYTH3	protein_coding
ENSG00000008277.14	423.041	0.286467	0.119862	2.38998	0.0168493	0.0497432	ADAM22	protein_coding
ENSG00000008282.9	9002.56	-0.240115	0.0596774	-4.02355	5.73286e-05	0.000386866	SYPL1	protein_coding
ENSG00000008283.16	5891.11	-0.29247	0.0691466	-4.22971	2.33995e-05	0.000174782	CYB561	protein_coding
ENSG00000008294.21	5485.95	0.0631077	0.0526319	1.19904	0.230513	0.386305	SPAG9	protein_coding
ENSG00000008300.17	1615.75	-0.621569	0.128192	-4.84874	1.24249e-06	1.27909e-05	CELSR3	protein_coding
ENSG00000008311.15	557.601	0.0737197	0.0995887	0.740242	0.459153	0.625786	AASS	protein_coding
ENSG00000008323.15	2743.34	-0.508535	0.117272	-4.33638	1.44851e-05	0.000114009	PLEKHG6	protein_coding
ENSG00000008324.12	953.482	-0.204013	0.0587301	-3.47374	0.000513254	0.00259277	SS18L2	protein_coding
ENSG00000008382.16	594.965	0.107463	0.0727582	1.47699	0.139679	0.267278	MPND	protein_coding
ENSG00000008394.13	7299.53	-0.414857	0.125925	-3.29447	0.000986068	0.00453184	MGST1	protein_coding
ENSG00000008405.12	1445.53	-0.133409	0.0495166	-2.69422	0.00705531	0.0240928	CRY1	protein_coding
ENSG00000008438.5	13.2104	0.409331	0.128845	3.17692	0.0014885	0.0064568	PGLYRP1	protein_coding
ENSG00000008441.18	10044.4	0.177081	0.0900374	1.96675	0.049212	0.118975	NFIX	protein_coding
ENSG00000008513.16	3799.74	-0.0697541	0.10565	-0.660238	0.509101	0.668905	ST3GAL1	protein_coding
ENSG00000143556.9	933.547	-2.87221	0.390828	-7.34904	1.99637e-13	6.00474e-12	S100A7	protein_coding
ENSG00000008517.18	10408.3	0.517825	0.115171	4.49615	6.9194e-06	5.92053e-05	IL32	protein_coding
ENSG00000008710.20	5099.11	0.330018	0.0988533	3.33846	0.000842437	0.00395371	PKD1	protein_coding
ENSG00000008735.14	880.307	-0.539393	0.182176	-2.96084	0.00306803	0.0119914	MAPK8IP2	protein_coding
ENSG00000008838.20	8110.52	-0.629185	0.100173	-6.28099	3.36428e-10	6.87498e-09	MED24	protein_coding
ENSG00000008853.17	1140.51	0.0739211	0.0748125	0.988085	0.323111	0.491473	RHOBTB2	protein_coding
ENSG00000008869.12	2389.38	0.0445638	0.0476756	0.93473	0.349928	0.519262	HEATR5B	protein_coding
ENSG00000008952.17	13972.4	-0.163657	0.0642303	-2.54797	0.0108353	0.0345532	SEC62	protein_coding
ENSG00000008988.11	52787.3	-0.187457	0.0714463	-2.62374	0.00869693	0.0287626	RPS20	protein_coding
ENSG00000009307.16	25361.3	0.0484226	0.046941	1.03156	0.302277	0.468752	CSDE1	protein_coding
ENSG00000009335.18	6898.75	-0.0478932	0.0515475	-0.929108	0.352833	0.52225	UBE3C	protein_coding
ENSG00000009413.16	2349.8	0.301854	0.0681327	4.43039	9.40644e-06	7.73904e-05	REV3L	protein_coding
ENSG00000009694.13	166.731	-0.404417	0.199835	-2.02375	0.0429954	0.106779	TENM1	protein_coding
ENSG00000009709.12	4.85002	-0.238822	0.299114	-0.798433	0.424619	0.593177	PAX7	protein_coding
ENSG00000009724.17	100.151	0.0589916	0.113231	0.520986	0.602376	0.744842	MASP2	protein_coding
ENSG00000009765.15	1707.73	-0.72158	0.172774	-4.17643	2.96124e-05	0.000215525	IYD	protein_coding
ENSG00000009780.16	792.327	-0.0993967	0.0457109	-2.17446	0.0296704	0.0791898	FAM76A	protein_coding
ENSG00000212901.4	17.152	-2.85942	0.424556	-6.73509	1.63834e-11	4.01092e-10	KRTAP3-1	protein_coding
ENSG00000009830.12	1085.36	-0.216938	0.0518532	-4.1837	2.86805e-05	0.000209487	POMT2	protein_coding
ENSG00000009844.16	3772.73	-0.231689	0.052875	-4.38183	1.17688e-05	9.44423e-05	VTA1	protein_coding
ENSG00000009950.16	1635.36	-0.767353	0.191028	-4.01696	5.89531e-05	0.000396361	MLXIPL	protein_coding
ENSG00000009954.11	8764.55	-0.129351	0.0403582	-3.20508	0.00135027	0.00593939	BAZ1B	protein_coding
ENSG00000010017.13	3032.15	-0.0559237	0.0519825	-1.07582	0.282009	0.446237	RANBP9	protein_coding
ENSG00000010030.14	1142.29	0.647653	0.111816	5.79214	6.94955e-09	1.1422e-07	ETV7	protein_coding
ENSG00000010072.16	877.137	-0.1834	0.0452222	-4.05552	5.0022e-05	0.000343255	SPRTN	protein_coding
ENSG00000010165.20	2213.22	-0.142806	0.0479049	-2.98102	0.00287288	0.011334	EEF1AKNMT	protein_coding
ENSG00000010219.13	855.402	0.0595099	0.0694631	0.856711	0.391604	0.561489	DYRK4	protein_coding
ENSG00000010244.19	9378.42	-0.127478	0.0346991	-3.67382	0.000238951	0.0013386	ZNF207	protein_coding
ENSG00000010256.11	12295	-0.225473	0.0662726	-3.4022	0.000668453	0.00323752	UQCRC1	protein_coding
ENSG00000010270.14	1609.16	-0.0767971	0.0590841	-1.29979	0.193672	0.34105	STARD3NL	protein_coding
ENSG00000010278.15	15320	-0.3984	0.0866581	-4.59737	4.27849e-06	3.86577e-05	CD9	protein_coding
ENSG00000010282.15	1.7829	0.126585	0.294395	0.429984	0.667208	0.794116	HHATL	protein_coding
ENSG00000010292.13	8750.42	-0.133082	0.0706461	-1.88378	0.0595942	0.138267	NCAPD2	protein_coding
ENSG00000010295.20	493.447	0.958635	0.0756779	12.6673	8.97544e-37	9.14417e-35	IFFO1	protein_coding
ENSG00000010310.9	174.029	-0.456481	0.131841	-3.46237	0.000535439	0.00268742	GIPR	protein_coding
ENSG00000010318.21	232.602	-0.0857926	0.0669687	-1.28108	0.200164	0.349385	PHF7	protein_coding
ENSG00000010319.7	655.763	0.710773	0.106502	6.67379	2.49277e-11	5.98361e-10	SEMA3G	protein_coding
ENSG00000010322.16	4516.82	0.225894	0.0543563	4.1558	3.24156e-05	0.000233212	NISCH	protein_coding
ENSG00000143954.13	60.7581	-2.84351	0.36899	-7.70621	1.29613e-14	4.34764e-13	REG3G	protein_coding
ENSG00000010361.14	369.51	0.083531	0.12508	0.667821	0.504248	0.664516	FUZ	protein_coding
ENSG00000010379.16	9.97993	-0.0845672	0.184241	-0.459003	0.646232	0.778244	SLC6A13	protein_coding
ENSG00000010404.18	1051.67	0.334039	0.0932725	3.58132	0.000341861	0.00182732	IDS	protein_coding
ENSG00000010438.17	3388.91	-0.673971	0.13186	-5.11125	3.20027e-07	3.78101e-06	PRSS3	protein_coding
ENSG00000010539.12	613.665	-0.0871829	0.0473487	-1.8413	0.0655781	0.149134	ZNF200	protein_coding
ENSG00000010626.15	281.822	-0.371175	0.0710521	-5.22399	1.75112e-07	2.19483e-06	LRRC23	protein_coding
ENSG00000188508.11	31.1009	-2.82748	0.338348	-8.35673	6.44819e-17	2.5651e-15	KRTDAP	protein_coding
ENSG00000010704.18	777.412	0.0763191	0.0737399	1.03498	0.30068	0.467006	HFE	protein_coding
ENSG00000010803.16	2380.95	-0.0374893	0.0617339	-0.607272	0.54367	0.69699	SCMH1	protein_coding
ENSG00000010810.17	2563.74	0.570299	0.0703326	8.1086	5.12078e-16	1.92061e-14	FYN	protein_coding
ENSG00000010818.10	3232.68	0.260929	0.0711697	3.66629	0.000246095	0.00137456	HIVEP2	protein_coding
ENSG00000011007.12	3364.14	-0.123244	0.0425641	-2.8955	0.00378556	0.0143086	ELOA	protein_coding
ENSG00000011009.11	4602.71	-0.215357	0.0637012	-3.38074	0.000722904	0.00346408	LYPLA2	protein_coding
ENSG00000011021.23	1255.48	0.0477315	0.0594032	0.803517	0.421676	0.590297	CLCN6	protein_coding
ENSG00000011028.14	5441.47	0.585176	0.106659	5.48642	4.10171e-08	5.87418e-07	MRC2	protein_coding
ENSG00000011052.21	0						NME1-NME2	protein_coding
ENSG00000011083.9	71.5856	-0.617214	0.207328	-2.97699	0.00291093	0.0114666	SLC6A7	protein_coding
ENSG00000011105.14	2026.64	0.245695	0.0800149	3.07062	0.00213618	0.00879863	TSPAN9	protein_coding
ENSG00000011114.15	2814.7	-0.0396427	0.0454199	-0.872805	0.382769	0.552929	BTBD7	protein_coding
ENSG00000011132.12	1091.88	0.130044	0.0518436	2.50838	0.0121286	0.0379192	APBA3	protein_coding
ENSG00000011143.19	680.794	-0.183936	0.0487378	-3.77398	0.000160663	0.000951256	MKS1	protein_coding
ENSG00000011198.10	1530.49	-0.0205928	0.058381	-0.352732	0.72429	0.833197	ABHD5	protein_coding
ENSG00000011201.12	805.468	0.327069	0.130516	2.50598	0.0122113	0.0381253	ANOS1	protein_coding
ENSG00000011243.18	1241.72	0.0491659	0.0422096	1.1648	0.244098	0.403006	AKAP8L	protein_coding
ENSG00000011258.16	1708.18	-0.103699	0.054702	-1.8957	0.0579991	0.135377	MBTD1	protein_coding
ENSG00000011260.14	1840.5	-0.159257	0.0477846	-3.33281	0.000859741	0.00402379	UTP18	protein_coding
ENSG00000011275.19	3795.59	0.174742	0.046601	3.74975	0.000177009	0.00103312	RNF216	protein_coding
ENSG00000011295.16	2805.92	-0.0931171	0.0603925	-1.54187	0.123106	0.242661	TTC19	protein_coding
ENSG00000011304.22	24965.5	-0.0893313	0.0442098	-2.02062	0.0433188	0.107414	PTBP1	protein_coding
ENSG00000011332.19	81.4316	0.0104981	0.119318	0.0879844	0.929889	0.961849	DPF1	protein_coding
ENSG00000011347.10	1824.23	-0.983461	0.199525	-4.92902	8.26442e-07	8.83117e-06	SYT7	protein_coding
ENSG00000011376.12	1807.89	0.0237792	0.060398	0.393708	0.693796	0.813052	LARS2	protein_coding
ENSG00000011405.13	6266.96	0.0164047	0.048884	0.335583	0.737185	0.841833	PIK3C2A	protein_coding
ENSG00000011422.12	5368.48	0.17242	0.103384	1.66776	0.0953641	0.199739	PLAUR	protein_coding
ENSG00000011426.11	4277.89	-0.513019	0.087717	-5.84857	4.95803e-09	8.42163e-08	ANLN	protein_coding
ENSG00000011451.21	5901.43	0.0400978	0.0536147	0.747887	0.454528	0.621514	WIZ	protein_coding
ENSG00000011454.18	3712.94	0.0102311	0.0584545	0.175026	0.861059	0.92169	RABGAP1	protein_coding
ENSG00000011465.18	22772.7	0.803739	0.127073	6.32504	2.53166e-10	5.26756e-09	DCN	protein_coding
ENSG00000011478.13	708.127	-0.0547662	0.0691476	-0.79202	0.428349	0.596525	QPCTL	protein_coding
ENSG00000011485.15	3776.92	-0.0659647	0.0548754	-1.20208	0.229332	0.385061	PPP5C	protein_coding
ENSG00000011523.14	1638.98	0.17153	0.0664033	2.58316	0.00979013	0.0317737	CEP68	protein_coding
ENSG00000011566.15	3053.19	-0.273436	0.0597395	-4.57715	4.7136e-06	4.20345e-05	MAP4K3	protein_coding
ENSG00000078898.7	32.3272	-2.63661	0.378139	-6.97258	3.11174e-12	8.31582e-11	BPIFB2	protein_coding
ENSG00000140519.14	317.959	-2.59748	0.259882	-9.99486	1.60519e-23	9.2927e-22	RHCG	protein_coding
ENSG00000011638.11	1441.35	-0.0368083	0.0779652	-0.472112	0.636847	0.771111	TMEM159	protein_coding
ENSG00000237412.7	11.1756	-2.56537	0.303209	-8.46073	2.65715e-17	1.08689e-15	PRSS56	protein_coding
ENSG00000012048.23	1865.07	-0.110792	0.0789877	-1.40264	0.160723	0.296936	BRCA1	protein_coding
ENSG00000012061.16	2190.66	-0.0346158	0.0532276	-0.650337	0.515475	0.674381	ERCC1	protein_coding
ENSG00000178372.8	22.6888	-2.55254	0.375228	-6.80265	1.02713e-11	2.57368e-10	CALML5	protein_coding
ENSG00000012171.20	3417.93	-0.496622	0.123713	-4.0143	5.96231e-05	0.000400537	SEMA3B	protein_coding
ENSG00000012174.12	1752.05	-0.0503242	0.0603254	-0.834211	0.404162	0.573478	MBTPS2	protein_coding
ENSG00000012211.13	1343.37	-0.185831	0.0618059	-3.00668	0.00264117	0.0105364	PRICKLE3	protein_coding
ENSG00000092758.18	1107.2	-2.5315	0.216988	-11.6666	1.88882e-31	1.55167e-29	COL9A3	protein_coding
ENSG00000012232.9	3494.27	-0.023407	0.0669066	-0.349845	0.726455	0.834772	EXTL3	protein_coding
ENSG00000012504.15	139.095	0.596767	0.252625	2.36227	0.0181636	0.0529531	NR1H4	protein_coding
ENSG00000012660.14	3125.03	0.167248	0.103604	1.6143	0.106462	0.217107	ELOVL5	protein_coding
ENSG00000012779.11	1846.75	0.567864	0.110133	5.15617	2.52047e-07	3.04586e-06	ALOX5	protein_coding
ENSG00000012817.16	1032.78	0.400107	0.279292	1.43258	0.151979	0.28493	KDM5D	protein_coding
ENSG00000012822.16	3765.02	0.255198	0.069668	3.66306	0.000249222	0.00138934	CALCOCO1	protein_coding
ENSG00000012963.15	1975.57	-0.0529404	0.0440007	-1.20317	0.22891	0.384575	UBR7	protein_coding
ENSG00000012983.11	2318.61	-0.0763596	0.0469403	-1.62674	0.103793	0.212801	MAP4K5	protein_coding
ENSG00000013016.16	872.794	0.521905	0.0936614	5.57225	2.51463e-08	3.74629e-07	EHD3	protein_coding
ENSG00000013275.8	6786.78	0.0248346	0.0639381	0.388416	0.697708	0.815622	PSMC4	protein_coding
ENSG00000013288.9	5022.48	0.0830801	0.0606381	1.3701	0.170656	0.310633	MAN2B2	protein_coding
ENSG00000013293.6	24.1384	0.786452	0.232722	3.37936	0.000726547	0.00347883	SLC7A14	protein_coding
ENSG00000013297.12	225.141	0.189797	0.166659	1.13883	0.254772	0.415499	CLDN11	protein_coding
ENSG00000013306.16	11224.9	-0.383105	0.0626775	-6.11233	9.81865e-10	1.88072e-08	SLC25A39	protein_coding
ENSG00000013364.19	16103.1	-0.121507	0.0682833	-1.77945	0.0751653	0.166146	MVP	protein_coding
ENSG00000013374.16	4832.74	0.326854	0.0540189	6.05073	1.44189e-09	2.6805e-08	NUB1	protein_coding
ENSG00000013375.16	2657.41	-0.147854	0.0662714	-2.23103	0.0256789	0.0703175	PGM3	protein_coding
ENSG00000013392.8	456.013	-0.0377608	0.0551861	-0.684244	0.493821	0.655502	RWDD2A	protein_coding
ENSG00000013441.16	3654.97	-0.0691131	0.0671498	-1.02924	0.303368	0.469955	CLK1	protein_coding
ENSG00000013503.10	880.813	-0.0636348	0.0573379	-1.10982	0.267076	0.429711	POLR3B	protein_coding
ENSG00000013523.11	2057.65	-0.135221	0.0546935	-2.47235	0.0134227	0.0412507	ANGEL1	protein_coding
ENSG00000013561.18	1863.92	-0.0822139	0.0427094	-1.92496	0.0542342	0.128287	RNF14	protein_coding
ENSG00000013563.14	647.919	-0.0728355	0.0700251	-1.04014	0.298277	0.464467	DNASE1L1	protein_coding
ENSG00000013573.17	1947.48	-0.287763	0.0797002	-3.61057	0.000305528	0.00165505	DDX11	protein_coding
ENSG00000013583.10	1863.25	-0.014384	0.0728138	-0.197546	0.843401	0.911152	HEBP1	protein_coding
ENSG00000013588.9	40001.5	-0.191558	0.127673	-1.50038	0.133516	0.258159	GPRC5A	protein_coding
ENSG00000013619.14	466.563	0.336162	0.111912	3.00379	0.00266636	0.0106214	MAMLD1	protein_coding
ENSG00000013810.20	4007.53	-0.1207	0.0822494	-1.46749	0.142243	0.270867	TACC3	protein_coding
ENSG00000014123.10	3579.68	-0.138488	0.0456376	-3.03451	0.0024093	0.00974732	UFL1	protein_coding
ENSG00000014138.9	296.723	-0.206411	0.0682015	-3.02649	0.00247408	0.00996705	POLA2	protein_coding
ENSG00000014164.7	3484.2	-0.195143	0.0599888	-3.25299	0.00114199	0.00514747	ZC3H3	protein_coding
ENSG00000014216.16	18353.9	-0.124575	0.0609444	-2.04407	0.0409463	0.102647	CAPN1	protein_coding
ENSG00000014257.16	583.104	-0.00381964	0.153114	-0.0249464	0.980098	0.989813	ACP3	protein_coding
ENSG00000014641.21	5849.31	-0.206073	0.0455662	-4.5225	6.11133e-06	5.29634e-05	MDH1	protein_coding
ENSG00000014824.14	3876.06	-0.16652	0.0480457	-3.46586	0.000528531	0.0026574	SLC30A9	protein_coding
ENSG00000014914.21	3756.22	-0.344291	0.105098	-3.2759	0.00105325	0.00480692	MTMR11	protein_coding
ENSG00000014919.13	1915.85	-0.117123	0.0508109	-2.30507	0.0211627	0.0600043	COX15	protein_coding
ENSG00000015133.19	4391.02	0.173478	0.0676366	2.56485	0.0103221	0.033172	CCDC88C	protein_coding
ENSG00000015153.15	1032.87	-0.0979494	0.0475142	-2.06148	0.0392577	0.0993568	YAF2	protein_coding
ENSG00000015171.20	5013.99	-0.0375884	0.0518533	-0.724899	0.468514	0.633994	ZMYND11	protein_coding
ENSG00000186895.4	14.9029	-2.41595	0.308503	-7.83121	4.83205e-15	1.67802e-13	FGF3	protein_coding
ENSG00000015413.9	1906.2	0.0849533	0.265941	0.319444	0.74939	0.849696	DPEP1	protein_coding
ENSG00000015475.19	2441.86	-0.221495	0.0637179	-3.47618	0.000508603	0.00257298	BID	protein_coding
ENSG00000015479.20	232.075	0.0878349	0.0816099	1.07628	0.281803	0.446027	MATR3	protein_coding
ENSG00000015520.15	1597.49	-0.532921	0.225693	-2.36126	0.0182129	0.0530652	NPC1L1	protein_coding
ENSG00000015532.10	2462.12	0.0286716	0.0686916	0.417396	0.676389	0.800648	XYLT2	protein_coding
ENSG00000015568.13	11.2499	-0.048829	0.0952462	-0.512661	0.608189	0.749272	RGPD5	protein_coding
ENSG00000015592.16	6.28488	0.939975	0.227307	4.13526	3.54553e-05	0.000253398	STMN4	protein_coding
ENSG00000015676.18	5121.69	-0.0876092	0.0437461	-2.00267	0.0452123	0.11114	NUDCD3	protein_coding
ENSG00000016082.15	302.311	0.269691	0.147134	1.83297	0.0668076	0.151364	ISL1	protein_coding
ENSG00000016391.11	2853.71	-0.302743	0.0929104	-3.25844	0.00112028	0.00506725	CHDH	protein_coding
ENSG00000016402.13	1036.63	-0.381225	0.121081	-3.14851	0.00164103	0.00702555	IL20RA	protein_coding
ENSG00000016490.16	343.311	-0.112827	0.347098	-0.325058	0.745137	0.847002	CLCA1	protein_coding
ENSG00000016864.18	2210.67	-0.139852	0.0442408	-3.16115	0.0015715	0.00676897	GLT8D1	protein_coding
ENSG00000017260.20	7179.56	0.0768049	0.0571203	1.34462	0.178749	0.321818	ATP2C1	protein_coding
ENSG00000131686.15	19.8006	-2.37974	0.273936	-8.68721	3.71458e-18	1.59919e-16	CA6	protein_coding
ENSG00000017483.15	1545.09	-0.0369779	0.181225	-0.204044	0.838319	0.907675	SLC38A5	protein_coding
ENSG00000017797.13	6547.66	-0.188768	0.051577	-3.65993	0.000252286	0.00140356	RALBP1	protein_coding
ENSG00000018189.13	1668.65	-0.00425353	0.0497461	-0.0855048	0.93186	0.96308	RUFY3	protein_coding
ENSG00000018236.15	443.697	0.615571	0.210384	2.92594	0.00343415	0.013197	CNTN1	protein_coding
ENSG00000018280.17	870.066	0.576683	0.125559	4.59294	4.3704e-06	3.9388e-05	SLC11A1	protein_coding
ENSG00000018408.15	5986.56	0.256907	0.109145	2.35382	0.0185816	0.0539225	WWTR1	protein_coding
ENSG00000018510.17	3994.15	-0.0702129	0.0508897	-1.37971	0.167676	0.306707	AGPS	protein_coding
ENSG00000018610.15	960.468	-0.128894	0.0457367	-2.81817	0.00482982	0.0175594	CXorf56	protein_coding
ENSG00000153802.12	29.9786	-2.369	0.285713	-8.29154	1.11789e-16	4.36928e-15	TMPRSS11D	protein_coding
ENSG00000018699.13	1076.05	-0.141512	0.047375	-2.98705	0.0028168	0.0111324	TTC27	protein_coding
ENSG00000018869.17	45.6449	0.713739	0.119899	5.95283	2.63541e-09	4.67833e-08	ZNF582	protein_coding
ENSG00000019102.12	3341.44	-0.442425	0.199861	-2.21366	0.026852	0.0730018	VSIG2	protein_coding
ENSG00000019144.19	3262.11	0.4804	0.0864079	5.55968	2.70277e-08	4.00717e-07	PHLDB1	protein_coding
ENSG00000019169.10	242.011	0.486228	0.207842	2.33941	0.0193144	0.0556779	MARCO	protein_coding
ENSG00000019485.13	979.215	0.0138348	0.0835665	0.165554	0.868508	0.926217	PRDM11	protein_coding
ENSG00000019505.8	3728.48	-0.188801	0.188951	-0.999208	0.317694	0.485862	SYT13	protein_coding
ENSG00000019549.13	781.389	0.55022	0.108563	5.06819	4.01613e-07	4.6432e-06	SNAI2	protein_coding
ENSG00000133636.11	214.123	-2.34435	0.265315	-8.83609	9.91263e-19	4.46277e-17	NTS	protein_coding
ENSG00000019991.18	572.929	0.933492	0.124155	7.51876	5.52976e-14	1.74877e-12	HGF	protein_coding
ENSG00000019995.6	890.988	0.0602024	0.0628207	0.958321	0.337901	0.507289	ZRANB1	protein_coding
ENSG00000020129.16	2073.89	-0.0430702	0.0515276	-0.835866	0.40323	0.572579	NCDN	protein_coding
ENSG00000020181.18	4228.58	0.788282	0.103119	7.64441	2.09908e-14	6.91375e-13	ADGRA2	protein_coding
ENSG00000020256.20	2065.28	-0.14904	0.0508376	-2.93169	0.00337123	0.0129907	ZFP64	protein_coding
ENSG00000020426.11	593.616	-0.192177	0.0573337	-3.3519	0.000802593	0.00379094	MNAT1	protein_coding
ENSG00000020577.14	1626.12	0.389672	0.111789	3.48579	0.000490692	0.0024939	SAMD4A	protein_coding
ENSG00000020633.19	1856.51	0.880126	0.104771	8.40045	4.44754e-17	1.78949e-15	RUNX3	protein_coding
ENSG00000020922.13	1812.02	-0.229414	0.0624461	-3.67379	0.000238977	0.0013386	MRE11	protein_coding
ENSG00000021300.14	3306.24	-0.651534	0.151331	-4.30535	1.66722e-05	0.000129035	PLEKHB1	protein_coding
ENSG00000021355.13	15065.9	-0.191958	0.091998	-2.08655	0.0369291	0.0945844	SERPINB1	protein_coding
ENSG00000021461.17	7.97826	-0.427769	0.196655	-2.17523	0.0296128	0.079077	CYP3A43	protein_coding
ENSG00000021488.13	285.285	0.0788723	0.226216	0.34866	0.727345	0.835395	SLC7A9	protein_coding
ENSG00000021574.13	1875.96	-0.127646	0.0458813	-2.78209	0.00540103	0.0192827	SPAST	protein_coding
ENSG00000021645.20	843.942	0.743647	0.193856	3.83608	0.000125011	0.000762936	NRXN3	protein_coding
ENSG00000021762.20	1957.98	0.00623062	0.0879194	0.0708675	0.943503	0.969308	OSBPL5	protein_coding
ENSG00000021776.11	4208.52	-0.027671	0.0457902	-0.604299	0.545645	0.698801	AQR	protein_coding
ENSG00000021826.17	9866.26	-0.546099	0.26381	-2.07004	0.0384485	0.0976855	CPS1	protein_coding
ENSG00000021852.13	6.22188	0.598784	0.284644	2.10363	0.035411	0.0914124	C8B	protein_coding
ENSG00000022267.19	7858.45	0.58951	0.192567	3.06132	0.00220366	0.00903584	FHL1	protein_coding
ENSG00000022277.13	3727.75	-0.203935	0.0519253	-3.92747	8.58455e-05	0.000550683	RTF2	protein_coding
ENSG00000022355.18	6.17782	0.655724	0.304761	2.1516	0.031429	0.0830188	GABRA1	protein_coding
ENSG00000022556.16	1949.7	-0.0805536	0.242863	-0.331683	0.740128	0.843915	NLRP2	protein_coding
ENSG00000022567.10	3220.81	-0.0851285	0.0748884	-1.13674	0.255648	0.416471	SLC45A4	protein_coding
ENSG00000022840.16	8820.13	-0.115326	0.0359524	-3.20775	0.00133779	0.00589239	RNF10	protein_coding
ENSG00000022976.15	279.35	0.10169	0.0554896	1.8326	0.0668621	0.151459	ZNF839	protein_coding
ENSG00000023041.11	2497.27	-0.18188	0.0457705	-3.97375	7.07498e-05	0.000464318	ZDHHC6	protein_coding
ENSG00000023171.18	1911.08	-0.295961	0.148489	-1.99316	0.046244	0.113253	GRAMD1B	protein_coding
ENSG00000023191.17	6781.58	0.0365371	0.0519339	0.703531	0.481725	0.645536	RNH1	protein_coding
ENSG00000023228.14	7212.87	-0.178569	0.0472671	-3.77787	0.000158177	0.000938234	NDUFS1	protein_coding
ENSG00000023287.13	4391.31	-0.15336	0.0560012	-2.73851	0.00617179	0.0215713	RB1CC1	protein_coding
ENSG00000023318.8	6759.4	-0.147131	0.049452	-2.97523	0.0029277	0.0115189	ERP44	protein_coding
ENSG00000023330.15	4750.61	0.0223058	0.067502	0.330446	0.741063	0.844399	ALAS1	protein_coding
ENSG00000023445.16	7539.32	0.743429	0.119629	6.21447	5.14995e-10	1.02557e-08	BIRC3	protein_coding
ENSG00000023516.9	5276.99	0.0203531	0.0682949	0.298018	0.765689	0.860581	AKAP11	protein_coding
ENSG00000023572.10	1158.69	-0.308865	0.0442098	-6.98636	2.82104e-12	7.58568e-11	GLRX2	protein_coding
ENSG00000023608.5	287.806	-0.158864	0.0573606	-2.76957	0.00561304	0.0199269	SNAPC1	protein_coding
ENSG00000023697.13	1927.69	-0.123429	0.0668205	-1.84718	0.0647212	0.147567	DERA	protein_coding
ENSG00000023734.11	6122.64	-0.12707	0.0593069	-2.14258	0.0321465	0.084524	STRAP	protein_coding
ENSG00000023839.12	541.465	-0.514677	0.206149	-2.49663	0.0125381	0.0389552	ABCC2	protein_coding
ENSG00000023892.11	1262.46	0.557782	0.0807276	6.90944	4.86584e-12	1.26487e-10	DEF6	protein_coding
ENSG00000023902.14	2625.6	0.835366	0.102716	8.1328	4.19494e-16	1.58301e-14	PLEKHO1	protein_coding
ENSG00000023909.10	1919.64	-0.192927	0.0624602	-3.08879	0.00200974	0.00835334	GCLM	protein_coding
ENSG00000024048.11	4495.11	0.0128675	0.0625136	0.205835	0.836919	0.906738	UBR2	protein_coding
ENSG00000024422.12	9629.94	0.297356	0.107922	2.75529	0.00586407	0.0206468	EHD2	protein_coding
ENSG00000024526.17	1177.06	-0.329343	0.0963403	-3.41853	0.000629593	0.00308729	DEPDC1	protein_coding
ENSG00000024862.18	989.685	-0.0933294	0.0507821	-1.83784	0.066086	0.150033	CCDC28A	protein_coding
ENSG00000025039.15	769.638	-0.170499	0.120785	-1.41159	0.158071	0.293324	RRAGD	protein_coding
ENSG00000025156.13	684.438	0.00368619	0.0553142	0.0666409	0.946868	0.971143	HSF2	protein_coding
ENSG00000025293.17	3546.95	-0.0643058	0.0432515	-1.48679	0.137071	0.263451	PHF20	protein_coding
ENSG00000025423.11	130.13	0.279764	0.116988	2.39139	0.0167847	0.0495734	HSD17B6	protein_coding
ENSG00000025434.19	1605.84	0.335835	0.0720583	4.66061	3.15279e-06	2.95397e-05	NR1H3	protein_coding
ENSG00000025708.14	5609.17	0.878093	0.107102	8.19865	2.431e-16	9.30931e-15	TYMP	protein_coding
ENSG00000025770.19	2248.32	-0.0818877	0.0654744	-1.25068	0.21105	0.363003	NCAPH2	protein_coding
ENSG00000025772.8	3914.99	-0.266891	0.0743288	-3.59068	0.000329812	0.0017708	TOMM34	protein_coding
ENSG00000025796.14	5907.25	-0.25017	0.058429	-4.28161	1.85544e-05	0.000141996	SEC63	protein_coding
ENSG00000025800.14	6246.09	-0.0393501	0.0373707	-1.05297	0.292356	0.457971	KPNA6	protein_coding
ENSG00000026025.16	18484.3	0.370938	0.0908356	4.08362	4.43387e-05	0.000309083	VIM	protein_coding
ENSG00000026036.22	188.891	-0.180977	0.0975507	-1.85521	0.0635662	0.145487	RTEL1-TNFRSF6B	protein_coding
ENSG00000026103.22	1299.6	0.806849	0.103297	7.81093	5.67672e-15	1.95753e-13	FAS	protein_coding
ENSG00000026297.16	2903.58	-0.169718	0.0786322	-2.15837	0.0308989	0.0818459	RNASET2	protein_coding
ENSG00000026508.20	25742	0.382316	0.116025	3.29512	0.0009838	0.00452226	CD44	protein_coding
ENSG00000026559.14	142.058	0.489715	0.184281	2.65744	0.00787365	0.026436	KCNG1	protein_coding
ENSG00000026652.15	570.127	0.12326	0.0956749	1.28832	0.197633	0.346103	AGPAT4	protein_coding
ENSG00000026950.17	3185.12	0.707699	0.0746905	9.47509	2.66531e-21	1.38495e-19	BTN3A1	protein_coding
ENSG00000027001.10	1483.95	-0.146578	0.0693427	-2.11382	0.0345309	0.089568	MIPEP	protein_coding
ENSG00000027075.15	1359.58	0.718206	0.0702049	10.2301	1.45304e-24	8.8932e-23	PRKCH	protein_coding
ENSG00000027644.5	16.0057	0.249366	0.174213	1.43139	0.152319	0.28534	INSRR	protein_coding
ENSG00000027697.15	6897.98	0.24709	0.0705351	3.50308	0.000459906	0.0023601	IFNGR1	protein_coding
ENSG00000027847.14	1688.85	-0.131022	0.0546199	-2.3988	0.016449	0.0487456	B4GALT7	protein_coding
ENSG00000027869.12	669.724	0.37323	0.083073	4.49279	7.02951e-06	5.9939e-05	SH2D2A	protein_coding
ENSG00000028116.18	996.468	0.26692	0.062968	4.23898	2.24536e-05	0.000168481	VRK2	protein_coding
ENSG00000028137.19	4424.91	0.656566	0.0786604	8.34685	7.01079e-17	2.7844e-15	TNFRSF1B	protein_coding
ENSG00000028203.18	3784.46	0.029566	0.0480589	0.615205	0.53842	0.692537	VEZT	protein_coding
ENSG00000028310.18	2219.17	-0.273731	0.0538592	-5.08235	3.728e-07	4.35019e-06	BRD9	protein_coding
ENSG00000028528.15	5178.24	0.104045	0.0402288	2.58633	0.00970034	0.0315218	SNX1	protein_coding
ENSG00000028839.10	695.592	-0.330457	0.0505069	-6.54281	6.03742e-11	1.36844e-09	TBPL1	protein_coding
ENSG00000029153.14	3014.43	-0.0870251	0.0973526	-0.893917	0.371366	0.541634	ARNTL2	protein_coding
ENSG00000029363.17	9164.98	-0.0617645	0.0399213	-1.54716	0.121825	0.240658	BCLAF1	protein_coding
ENSG00000029364.12	6104.03	-0.104517	0.0472406	-2.21245	0.0269359	0.0731653	SLC39A9	protein_coding
ENSG00000185966.4	3.15388	-2.27554	0.568946	-3.99957	6.34569e-05	0.000422592	LCE3E	protein_coding
ENSG00000029559.7	85.1978	-0.591946	0.231541	-2.55654	0.0105717	0.0338291	IBSP	protein_coding
ENSG00000029639.11	631.456	-0.17737	0.0552471	-3.21048	0.00132513	0.00584658	TFB1M	protein_coding
ENSG00000029725.17	2202.21	0.277005	0.0515109	5.3776	7.54835e-08	1.02494e-06	RABEP1	protein_coding
ENSG00000029993.15	3053.83	-0.355192	0.0914843	-3.88254	0.00010337	0.000646731	HMGB3	protein_coding
ENSG00000030066.13	4172.25	-0.0540443	0.0520041	-1.03923	0.298697	0.464829	NUP160	protein_coding
ENSG00000030110.13	2530.27	0.0718002	0.0744082	0.964949	0.33457	0.50358	BAK1	protein_coding
ENSG00000169550.14	89.9011	-2.25977	0.376861	-5.99628	2.01892e-09	3.65516e-08	MUC15	protein_coding
ENSG00000030419.16	719.308	0.146088	0.113347	1.28885	0.197451	0.34587	IKZF2	protein_coding
ENSG00000030582.18	34560.2	0.0992347	0.0645395	1.53758	0.124151	0.244252	GRN	protein_coding
ENSG00000031003.10	1534.11	0.379132	0.0669648	5.66167	1.49908e-08	2.32628e-07	FAM13B	protein_coding
ENSG00000031081.11	2145	0.866949	0.0814671	10.6417	1.90608e-26	1.2955e-24	ARHGAP31	protein_coding
ENSG00000031691.7	392.842	-0.309886	0.0711844	-4.35329	1.34112e-05	0.000106424	CENPQ	protein_coding
ENSG00000031698.13	6206.8	-0.0619595	0.0484924	-1.27772	0.201349	0.350775	SARS1	protein_coding
ENSG00000031823.14	3711.81	0.179005	0.0439641	4.07163	4.66852e-05	0.000323288	RANBP3	protein_coding
ENSG00000032219.19	2414.85	-0.00366093	0.0554819	-0.0659842	0.94739	0.971544	ARID4A	protein_coding
ENSG00000032389.13	1748.3	-0.160961	0.0569884	-2.82446	0.00473609	0.0172658	EIPR1	protein_coding
ENSG00000032444.17	4018.05	0.181354	0.0565614	3.20632	0.00134443	0.00591743	PNPLA6	protein_coding
ENSG00000032742.18	826.848	-0.271505	0.061837	-4.39066	1.13009e-05	9.10439e-05	IFT88	protein_coding
ENSG00000033011.13	1416.11	-0.1229	0.0609046	-2.01791	0.0436003	0.107949	ALG1	protein_coding
ENSG00000033030.15	1566.2	-0.000924569	0.0403855	-0.0228936	0.981735	0.990735	ZCCHC8	protein_coding
ENSG00000033050.9	975.338	-0.210508	0.0573108	-3.6731	0.000239628	0.00134194	ABCF2	protein_coding
ENSG00000033100.16	4115.11	0.136611	0.061811	2.21013	0.027096	0.0734946	CHPF2	protein_coding
ENSG00000033122.21	91.0771	0.275101	0.146349	1.87976	0.0601405	0.139252	LRRC7	protein_coding
ENSG00000033170.17	3936.63	0.218302	0.0707732	3.08453	0.00203875	0.0084525	FUT8	protein_coding
ENSG00000033178.13	3363.34	-0.0121335	0.0643425	-0.188577	0.850424	0.915644	UBA6	protein_coding
ENSG00000033327.13	2394.51	0.32809	0.0749767	4.37589	1.20938e-05	9.68764e-05	GAB2	protein_coding
ENSG00000033627.17	4474.21	-0.129995	0.0534916	-2.43019	0.0150908	0.0453611	ATP6V0A1	protein_coding
ENSG00000033800.14	4307.82	0.0316061	0.0415345	0.76096	0.446681	0.614197	PIAS1	protein_coding
ENSG00000033867.16	2109.36	0.191358	0.0735641	2.60125	0.00928855	0.0304106	SLC4A7	protein_coding
ENSG00000034053.14	393.229	0.531632	0.107272	4.95591	7.19941e-07	7.80155e-06	APBA2	protein_coding
ENSG00000034152.19	4981.42	-0.0372585	0.0717206	-0.519494	0.603416	0.745659	MAP2K3	protein_coding
ENSG00000034239.11	13.3834	-0.199062	0.169703	-1.17301	0.240793	0.399221	EFCAB1	protein_coding
ENSG00000034510.6	53957.3	-0.116587	0.083334	-1.39903	0.161803	0.298423	TMSB10	protein_coding
ENSG00000034533.12	547.163	0.00938079	0.0500106	0.187576	0.851209	0.916095	ASTE1	protein_coding
ENSG00000034677.13	4024.21	0.105149	0.0674436	1.55907	0.11898	0.236307	RNF19A	protein_coding
ENSG00000034693.15	828.597	-0.104557	0.0560843	-1.86428	0.062283	0.143249	PEX3	protein_coding
ENSG00000034713.8	3048.89	-0.161258	0.044125	-3.65457	0.000257611	0.00142882	GABARAPL2	protein_coding
ENSG00000034971.17	149.773	0.759598	0.304727	2.49271	0.0126771	0.0393102	MYOC	protein_coding
ENSG00000035115.22	3367.93	-0.379325	0.0766219	-4.95061	7.39822e-07	7.99119e-06	SH3YL1	protein_coding
ENSG00000035141.8	3329.42	-0.293302	0.0548885	-5.34359	9.11238e-08	1.21518e-06	FAM136A	protein_coding
ENSG00000035403.18	18579.1	0.142173	0.0864027	1.64548	0.0998718	0.206551	VCL	protein_coding
ENSG00000035499.13	1077.71	-0.214029	0.0972039	-2.20185	0.0276758	0.0747704	DEPDC1B	protein_coding
ENSG00000035664.11	651.291	-0.212431	0.104769	-2.02762	0.0425995	0.106015	DAPK2	protein_coding
ENSG00000035681.9	2232.72	0.0675086	0.051558	1.30937	0.190408	0.336675	NSMAF	protein_coding
ENSG00000035687.10	2815.41	-0.244383	0.0420777	-5.80791	6.32593e-09	1.05129e-07	ADSS2	protein_coding
ENSG00000091704.10	38.5354	-2.24672	0.316153	-7.10643	1.19081e-12	3.32939e-11	CPA1	protein_coding
ENSG00000035862.12	15939.8	0.331426	0.103857	3.19117	0.00141699	0.00618864	TIMP2	protein_coding
ENSG00000035928.16	2934.77	0.0356925	0.045742	0.7803	0.435214	0.603405	RFC1	protein_coding
ENSG00000036054.13	2585.12	-0.115561	0.0421644	-2.74073	0.0061303	0.0214482	TBC1D23	protein_coding
ENSG00000036257.13	3657.33	-0.0424571	0.0449567	-0.944398	0.344966	0.514038	CUL3	protein_coding
ENSG00000036448.10	99.7182	-0.0144533	0.114085	-0.126689	0.899187	0.944706	MYOM2	protein_coding
ENSG00000036473.8	307.343	-0.225789	0.290197	-0.778055	0.436537	0.60471	OTC	protein_coding
ENSG00000036530.9	53.7544	-0.0298188	0.119674	-0.249167	0.803232	0.88499	CYP46A1	protein_coding
ENSG00000036549.13	2530.32	-0.0911567	0.0422109	-2.15955	0.0308072	0.0816568	ZZZ3	protein_coding
ENSG00000036565.15	36.9553	0.361557	0.212886	1.69836	0.0894405	0.190182	SLC18A1	protein_coding
ENSG00000036672.16	251.157	-0.132992	0.140356	-0.947537	0.343365	0.512414	USP2	protein_coding
ENSG00000136694.9	8.22629	-2.232	0.436265	-5.11614	3.11845e-07	3.69231e-06	IL36A	protein_coding
ENSG00000037042.9	677.953	-0.13275	0.0763091	-1.73964	0.0819228	0.177635	TUBG2	protein_coding
ENSG00000037241.7	837.004	-0.228077	0.06277	-3.63353	0.000279566	0.00153348	RPL26L1	protein_coding
ENSG00000037280.16	985.264	0.511865	0.0842595	6.07486	1.24095e-09	2.33161e-08	FLT4	protein_coding
ENSG00000037474.15	4318.92	-0.230294	0.0583225	-3.94864	7.85962e-05	0.00050961	NSUN2	protein_coding
ENSG00000037637.11	2175.66	0.0173873	0.0412745	0.42126	0.673565	0.798824	FBXO42	protein_coding
ENSG00000037749.12	1074.24	0.314991	0.0656486	4.79815	1.60141e-06	1.61381e-05	MFAP3	protein_coding
ENSG00000037757.14	875.331	-0.04651	0.0714371	-0.651063	0.515006	0.674018	MRI1	protein_coding
ENSG00000037897.17	749.657	-0.349481	0.0712293	-4.90642	9.27547e-07	9.8051e-06	METTL1	protein_coding
ENSG00000037965.6	214.622	-0.674623	0.16664	-4.04838	5.15734e-05	0.000351938	HOXC8	protein_coding
ENSG00000038002.9	896.134	-0.220199	0.0672452	-3.27457	0.00105825	0.00482616	AGA	protein_coding
ENSG00000038210.14	2356.15	-0.140373	0.0615344	-2.28122	0.0225354	0.0631863	PI4K2B	protein_coding
ENSG00000038219.13	4882.18	0.0700558	0.0525868	1.33219	0.182796	0.327049	BOD1L1	protein_coding
ENSG00000038274.17	4106.3	0.153053	0.0511969	2.9895	0.00279431	0.0110595	MAT2B	protein_coding
ENSG00000108244.17	1496.61	-2.1959	0.259812	-8.45189	2.8662e-17	1.16948e-15	KRT23	protein_coding
ENSG00000038358.15	3167.54	-0.004549	0.0581138	-0.0782776	0.937607	0.966054	EDC4	protein_coding
ENSG00000038382.20	6423.69	0.0393021	0.072134	0.544848	0.585858	0.731451	TRIO	protein_coding
ENSG00000038427.16	12439.5	0.570045	0.117631	4.84605	1.25941e-06	1.2938e-05	VCAN	protein_coding
ENSG00000038532.16	2710.12	0.15944	0.0508458	3.13576	0.00171409	0.00728951	CLEC16A	protein_coding
ENSG00000038945.15	1780.04	0.964385	0.118093	8.16634	3.17892e-16	1.20608e-14	MSR1	protein_coding
ENSG00000039068.19	24494.7	-0.410729	0.101902	-4.03065	5.56228e-05	0.00037649	CDH1	protein_coding
ENSG00000039123.16	3188.34	0.0416436	0.0514146	0.809956	0.417965	0.586785	MTREX	protein_coding
ENSG00000039139.9	252.481	-0.285684	0.144505	-1.97698	0.0480436	0.116667	DNAH5	protein_coding
ENSG00000039319.17	1860.07	0.226671	0.0576219	3.93376	8.36261e-05	0.0005382	ZFYVE16	protein_coding
ENSG00000039523.20	2906.51	0.119201	0.0662537	1.79916	0.0719932	0.16054	RIPOR1	protein_coding
ENSG00000039537.14	166.935	-0.10761	0.216566	-0.496893	0.619264	0.757859	C6	protein_coding
ENSG00000039560.14	4283.11	0.123602	0.0757494	1.63173	0.102736	0.211154	RAI14	protein_coding
ENSG00000039600.11	113.39	-0.40473	0.172654	-2.34416	0.0190699	0.055099	SOX30	protein_coding
ENSG00000039650.12	2034.11	-0.125936	0.058345	-2.15848	0.0308905	0.0818337	PNKP	protein_coding
ENSG00000039987.7	13.1247	-0.139168	0.209315	-0.664874	0.506131	0.666391	BEST2	protein_coding
ENSG00000040199.18	834.537	0.201845	0.0811535	2.4872	0.0128753	0.0398168	PHLPP2	protein_coding
ENSG00000040275.17	1056.92	-0.315367	0.0636855	-4.95195	7.3475e-07	7.94803e-06	SPDL1	protein_coding
ENSG00000040341.18	2265.03	-0.153592	0.0543932	-2.82374	0.00474665	0.0172979	STAU2	protein_coding
ENSG00000040487.13	1144.73	-0.196808	0.063997	-3.07527	0.00210314	0.00867999	SLC66A1	protein_coding
ENSG00000040531.16	1108.02	0.151032	0.0487724	3.09668	0.00195703	0.00816945	CTNS	protein_coding
ENSG00000040608.14	695.22	-0.235888	0.110396	-2.13675	0.0326187	0.0855004	RTN4R	protein_coding
ENSG00000040633.13	1755.03	0.125126	0.0523711	2.38922	0.0168841	0.0498263	PHF23	protein_coding
ENSG00000040731.10	16.2395	0.586827	0.271851	2.15864	0.0308784	0.0818191	CDH10	protein_coding
ENSG00000040933.16	2162.69	0.387326	0.0563042	6.87917	6.02008e-12	1.54773e-10	INPP4A	protein_coding
ENSG00000041353.10	3572.83	-0.0446721	0.13996	-0.319177	0.749592	0.849769	RAB27B	protein_coding
ENSG00000041357.16	7382.18	-0.0963697	0.0559469	-1.72252	0.0849752	0.182676	PSMA4	protein_coding
ENSG00000041515.16	64.7574	0.217434	0.140591	1.54657	0.121966	0.240849	MYO16	protein_coding
ENSG00000041802.11	3031.11	-0.200925	0.0517285	-3.88422	0.00010266	0.000642955	LSG1	protein_coding
ENSG00000041880.14	1577.38	0.199762	0.0784106	2.54763	0.0108456	0.0345767	PARP3	protein_coding
ENSG00000041982.16	14918.5	0.369716	0.167252	2.21053	0.0270682	0.0734476	TNC	protein_coding
ENSG00000041988.15	497.724	-0.0358272	0.0533601	-0.671423	0.501951	0.662504	THAP3	protein_coding
ENSG00000042062.13	288.707	0.540846	0.103911	5.2049	1.94102e-07	2.40166e-06	RIPOR3	protein_coding
ENSG00000042088.14	1139.36	-0.00844478	0.0490318	-0.172231	0.863256	0.922967	TDP1	protein_coding
ENSG00000042286.15	1716.73	-0.294698	0.0752851	-3.91443	9.06187e-05	0.000576641	AIFM2	protein_coding
ENSG00000042304.12	6.41613	-0.132841	0.256458	-0.517982	0.604471	0.746553	C2orf83	protein_coding
ENSG00000042317.17	436.348	-0.0901443	0.0548962	-1.64209	0.100572	0.207642	SPATA7	protein_coding
ENSG00000042429.12	318.562	-0.0637507	0.0488596	-1.30477	0.19197	0.338723	MED17	protein_coding
ENSG00000042445.14	5038.87	-0.253221	0.0734788	-3.44618	0.000568563	0.00282862	RETSAT	protein_coding
ENSG00000042493.16	7132.08	0.150599	0.0887692	1.69653	0.089786	0.190801	CAPG	protein_coding
ENSG00000042753.12	4375.57	-0.187141	0.0631674	-2.96262	0.00305028	0.0119353	AP2S1	protein_coding
ENSG00000042781.14	33.2886	-0.202421	0.147331	-1.37392	0.169466	0.309096	USH2A	protein_coding
ENSG00000042813.8	2.75308	-0.044385	0.349963	-0.126828	0.899077	0.944696	ZPBP	protein_coding
ENSG00000042832.12	81.2813	-0.253966	0.161543	-1.57212	0.115923	0.2316	TG	protein_coding
ENSG00000042980.13	3258.4	0.510905	0.153823	3.32139	0.000895705	0.00416872	ADAM28	protein_coding
ENSG00000043039.7	876.911	-0.916076	0.162536	-5.63614	1.73902e-08	2.67e-07	BARX2	protein_coding
ENSG00000043093.15	2403.82	-0.103453	0.0475045	-2.17775	0.0294247	0.078679	DCUN1D1	protein_coding
ENSG00000043143.20	4348.65	0.620219	0.0780073	7.95078	1.85338e-15	6.67163e-14	JADE2	protein_coding
ENSG00000043355.12	497.07	-0.164161	0.248556	-0.660457	0.50896	0.668828	ZIC2	protein_coding
ENSG00000205420.11	2077.42	-2.19442	0.329358	-6.66274	2.68775e-11	6.40789e-10	KRT6A	protein_coding
ENSG00000043514.17	798.93	-0.217086	0.0451531	-4.80777	1.52621e-06	1.54499e-05	TRIT1	protein_coding
ENSG00000043591.6	142.947	-0.51927	0.152963	-3.39475	0.000686912	0.00331388	ADRB1	protein_coding
ENSG00000044012.4	30.3065	-0.8728	0.27305	-3.19648	0.00139115	0.00609144	GUCA2B	protein_coding
ENSG00000044090.10	2162.71	-0.148906	0.0709363	-2.09914	0.0358042	0.0922246	CUL7	protein_coding
ENSG00000044115.21	24626.9	-0.14705	0.0580621	-2.53263	0.0113211	0.0358648	CTNNA1	protein_coding
ENSG00000044446.12	1324.12	-0.00979925	0.0663667	-0.147653	0.882617	0.934827	PHKA2	protein_coding
ENSG00000044459.15	446.804	0.212122	0.101741	2.08493	0.0370755	0.0948782	CNTLN	protein_coding
ENSG00000044524.11	967.441	0.886584	0.151945	5.8349	5.38224e-09	9.0764e-08	EPHA3	protein_coding
ENSG00000044574.8	43169.6	-0.213469	0.0555759	-3.84104	0.000122515	0.000749375	HSPA5	protein_coding
ENSG00000046604.13	22953.6	-0.411606	0.104227	-3.94912	7.84384e-05	0.000508939	DSG2	protein_coding
ENSG00000046647.13	775.534	-0.113778	0.0556469	-2.04464	0.0408906	0.102556	GEMIN8	protein_coding
ENSG00000046651.15	1808.35	-0.130754	0.0571522	-2.28782	0.0221478	0.0622665	OFD1	protein_coding
ENSG00000046653.15	399.669	0.431554	0.127332	3.3892	0.000700974	0.00337114	GPM6B	protein_coding
ENSG00000046774.10	36.6162	-0.929719	0.518844	-1.79191	0.0731481	0.162629	MAGEC2	protein_coding
ENSG00000046889.19	716.689	0.572352	0.108646	5.26804	1.37891e-07	1.76564e-06	PREX2	protein_coding
ENSG00000047056.16	1220.31	0.113101	0.0516243	2.19086	0.0284622	0.0765923	WDR37	protein_coding
ENSG00000047188.16	2149.29	0.204777	0.0602774	3.39724	0.00068069	0.00328934	YTHDC2	protein_coding
ENSG00000047230.15	1826.76	-0.222373	0.0581416	-3.82468	0.000130943	0.000793922	CTPS2	protein_coding
ENSG00000047249.18	2609.05	-0.164872	0.049906	-3.30365	0.000954336	0.00440204	ATP6V1H	protein_coding
ENSG00000047315.17	5405.13	0.0313097	0.0528302	0.592649	0.553416	0.705195	POLR2B	protein_coding
ENSG00000047346.12	1719.93	0.136573	0.0647419	2.10951	0.0349008	0.0903467	FAM214A	protein_coding
ENSG00000047365.12	1727.41	0.228522	0.0824481	2.77171	0.00557622	0.0198133	ARAP2	protein_coding
ENSG00000047410.14	8819.15	-0.0175264	0.0492573	-0.355814	0.72198	0.831858	TPR	protein_coding
ENSG00000047457.14	1267.63	0.044543	0.208347	0.213793	0.830708	0.902831	CP	protein_coding
ENSG00000047578.13	1913.63	-0.0431863	0.0558631	-0.773074	0.439478	0.607399	KATNIP	protein_coding
ENSG00000047579.20	999.798	0.0486914	0.045225	1.07665	0.281637	0.445879	DTNBP1	protein_coding
ENSG00000047597.7	1412.55	-0.129934	0.128076	-1.01451	0.310341	0.477956	XK	protein_coding
ENSG00000047617.15	56.2546	0.21048	0.103219	2.03916	0.0414344	0.103703	ANO2	protein_coding
ENSG00000047621.12	999.02	0.228486	0.0488069	4.68143	2.84881e-06	2.69717e-05	C12orf4	protein_coding
ENSG00000047634.15	1833.54	-0.173723	0.0999304	-1.73844	0.0821342	0.177968	SCML1	protein_coding
ENSG00000047644.19	2934.73	0.342537	0.0804247	4.2591	2.05255e-05	0.000155315	WWC3	protein_coding
ENSG00000047648.23	737.961	0.0907065	0.130489	0.695126	0.486976	0.649797	ARHGAP6	protein_coding
ENSG00000047662.5	27.2074	-0.260133	0.105363	-2.46892	0.0135521	0.0415782	FAM184B	protein_coding
ENSG00000047849.21	16260.1	0.269892	0.0539589	5.00181	5.67957e-07	6.33454e-06	MAP4	protein_coding
ENSG00000047932.14	2239.25	-0.139422	0.0439302	-3.17373	0.00150495	0.00651899	GOPC	protein_coding
ENSG00000047936.11	101.029	-0.939402	0.227326	-4.1324	3.58998e-05	0.000256097	ROS1	protein_coding
ENSG00000048028.11	1976.63	0.0890324	0.0545234	1.63292	0.102485	0.210779	USP28	protein_coding
ENSG00000048052.22	1213.24	0.506397	0.137332	3.68739	0.000226563	0.00127794	HDAC9	protein_coding
ENSG00000048140.18	2252.13	0.0285621	0.0542316	0.526669	0.598423	0.7415	TSPAN17	protein_coding
ENSG00000048162.21	1059.23	-0.35921	0.0698823	-5.14022	2.74417e-07	3.28392e-06	NOP16	protein_coding
ENSG00000048342.17	765.597	0.195198	0.0947692	2.05972	0.0394258	0.0996796	CC2D2A	protein_coding
ENSG00000048392.12	2522.61	0.191211	0.0697746	2.74041	0.00613634	0.0214672	RRM2B	protein_coding
ENSG00000048405.10	2148.98	-0.00782421	0.0459696	-0.170204	0.86485	0.923747	ZNF800	protein_coding
ENSG00000123584.7	7.1081	-2.1899	0.525017	-4.17111	3.03115e-05	0.000219866	MAGEA9	protein_coding
ENSG00000048471.14	1889.39	0.496118	0.0708096	7.00636	2.44595e-12	6.62412e-11	SNX29	protein_coding
ENSG00000048540.15	325.017	0.532992	0.164654	3.23704	0.00120777	0.00539739	LMO3	protein_coding
ENSG00000048544.6	3353.53	-0.380607	0.0601304	-6.3297	2.45638e-10	5.11959e-09	MRPS10	protein_coding
ENSG00000048545.16	3.40764	-0.269982	0.206199	-1.30932	0.190424	0.336689	GUCA1A	protein_coding
ENSG00000048649.13	4660.5	-0.0703914	0.0473546	-1.48648	0.137154	0.263536	RSF1	protein_coding
ENSG00000048707.15	5371.51	0.114569	0.0600253	1.90868	0.0563036	0.132153	VPS13D	protein_coding
ENSG00000124935.4	1.51621	-2.18107	0.46547	-4.68573	2.78959e-06	2.651e-05	SCGB1D2	protein_coding
ENSG00000048828.17	23277.1	-0.140522	0.0508223	-2.76497	0.00569273	0.0201589	FAM120A	protein_coding
ENSG00000048991.16	2989.69	-0.0541279	0.0456329	-1.18616	0.235559	0.392809	R3HDM1	protein_coding
ENSG00000049089.15	956.121	-0.394235	0.156768	-2.51477	0.0119108	0.0373508	COL9A2	protein_coding
ENSG00000049130.16	4010.43	-0.0321306	0.102363	-0.313888	0.753606	0.852434	KITLG	protein_coding
ENSG00000049167.15	646.43	-0.0148643	0.0505004	-0.29434	0.768498	0.862302	ERCC8	protein_coding
ENSG00000049192.15	274.852	-0.0258013	0.108954	-0.236808	0.812805	0.891367	ADAMTS6	protein_coding
ENSG00000049239.13	8910.08	0.254197	0.068945	3.68696	0.000226947	0.00127981	H6PD	protein_coding
ENSG00000049245.13	6663.97	0.103337	0.0482591	2.1413	0.03225	0.0847285	VAMP3	protein_coding
ENSG00000049246.14	1460.85	0.204384	0.108139	1.89002	0.0587559	0.136703	PER3	protein_coding
ENSG00000049247.14	54.1536	0.320869	0.211311	1.51847	0.128897	0.251325	UTS2	protein_coding
ENSG00000049283.18	2379.07	-0.710751	0.135582	-5.24223	1.58648e-07	2.0074e-06	EPN3	protein_coding
ENSG00000049323.16	6496.66	0.537676	0.118877	4.52295	6.09822e-06	5.28685e-05	LTBP1	protein_coding
ENSG00000049449.10	3422.54	0.0010276	0.0871379	0.0117928	0.990591	0.994857	RCN1	protein_coding
ENSG00000049540.18	5099.42	0.431651	0.148627	2.90426	0.0036812	0.0139794	ELN	protein_coding
ENSG00000049541.11	1803.81	-0.212333	0.0654727	-3.24307	0.00118249	0.00530167	RFC2	protein_coding
ENSG00000049618.24	7512.46	0.031924	0.0462599	0.690102	0.49013	0.652552	ARID1B	protein_coding
ENSG00000049656.14	7749.18	-0.209856	0.0647888	-3.23908	0.00119915	0.00536579	CLPTM1L	protein_coding
ENSG00000049759.19	5348.91	-0.0890619	0.074257	-1.19937	0.230383	0.386166	NEDD4L	protein_coding
ENSG00000187054.16	17.0759	-2.15085	0.332883	-6.46128	1.03819e-10	2.28579e-09	TMPRSS11A	protein_coding
ENSG00000049769.14	125.192	0.142644	0.091733	1.55499	0.119949	0.237807	PPP1R3F	protein_coding
ENSG00000049860.14	7286.77	0.0788424	0.0600376	1.31322	0.18911	0.335088	HEXB	protein_coding
ENSG00000049883.15	678.776	0.0518446	0.0491153	1.05557	0.291165	0.456756	PTCD2	protein_coding
ENSG00000050030.16	82.8105	0.448018	0.204581	2.18993	0.0285296	0.0767444	NEXMIF	protein_coding
ENSG00000050130.18	2047.37	0.0792164	0.0524084	1.51152	0.130656	0.253952	JKAMP	protein_coding
ENSG00000050165.18	5188.21	0.150162	0.0991964	1.51378	0.130081	0.253148	DKK3	protein_coding
ENSG00000050327.15	1275.77	-0.252058	0.0748915	-3.36565	0.000763644	0.00363348	ARHGEF5	protein_coding
ENSG00000050344.9	3074.95	-0.0102764	0.0897837	-0.114457	0.908875	0.950219	NFE2L3	protein_coding
ENSG00000050393.11	3431.34	-0.351516	0.0725137	-4.84759	1.24973e-06	1.28573e-05	MCUR1	protein_coding
ENSG00000050405.13	11635.5	0.0880379	0.082024	1.07332	0.283128	0.447461	LIMA1	protein_coding
ENSG00000050426.16	2732.34	-0.146963	0.0501539	-2.93025	0.00338692	0.013043	LETMD1	protein_coding
ENSG00000050438.17	336.614	-0.284403	0.134012	-2.12221	0.0338198	0.0880672	SLC4A8	protein_coding
ENSG00000050555.19	452.23	0.45132	0.157903	2.8582	0.00426045	0.0157844	LAMC3	protein_coding
ENSG00000050628.20	570.66	0.408259	0.158149	2.58148	0.00983788	0.0318929	PTGER3	protein_coding
ENSG00000050730.16	104.091	0.997654	0.121898	8.18434	2.73796e-16	1.0428e-14	TNIP3	protein_coding
ENSG00000050748.18	3060.61	-0.157593	0.0502452	-3.13648	0.00170987	0.00727535	MAPK9	protein_coding
ENSG00000050767.17	144.259	0.660501	0.121197	5.44983	5.04176e-08	7.0945e-07	COL23A1	protein_coding
ENSG00000050820.17	7715.64	-0.250017	0.0655888	-3.81188	0.000137915	0.000830561	BCAR1	protein_coding
ENSG00000051009.11	3453.75	-0.188363	0.0602164	-3.1281	0.00175942	0.00745907	FAM160A2	protein_coding
ENSG00000051108.15	8207.47	0.281602	0.0627502	4.48766	7.20082e-06	6.12194e-05	HERPUD1	protein_coding
ENSG00000051128.19	423.767	0.0999836	0.100129	0.998543	0.318016	0.486232	HOMER3	protein_coding
ENSG00000051180.17	742.928	-0.106061	0.0775509	-1.36763	0.171427	0.311679	RAD51	protein_coding
ENSG00000051341.14	1002.79	-0.027248	0.0995494	-0.273713	0.784305	0.872841	POLQ	protein_coding
ENSG00000051382.9	3885.72	-0.0466721	0.0590962	-0.789764	0.429665	0.597783	PIK3CB	protein_coding
ENSG00000051523.11	16026	0.0936769	0.0901944	1.03861	0.298985	0.465158	CYBA	protein_coding
ENSG00000051596.10	816.785	-0.244375	0.0708855	-3.44746	0.00056589	0.00281731	THOC3	protein_coding
ENSG00000051620.11	5471.2	-0.367245	0.057105	-6.43105	1.26724e-10	2.75678e-09	HEBP2	protein_coding
ENSG00000051825.15	1334.66	0.100105	0.0614546	1.62892	0.103329	0.212062	MPHOSPH9	protein_coding
ENSG00000052126.14	3318.8	-0.150174	0.0686899	-2.18626	0.0287963	0.0773054	PLEKHA5	protein_coding
ENSG00000052344.16	9215.93	-0.375493	0.117758	-3.18868	0.00142924	0.00623391	PRSS8	protein_coding
ENSG00000052723.12	2509.07	-0.0482338	0.0427107	-1.12931	0.258766	0.420091	SIKE1	protein_coding
ENSG00000052749.14	2687.11	-0.21952	0.0615423	-3.56698	0.000361118	0.00191675	RRP12	protein_coding
ENSG00000052795.13	3446.09	-0.0719086	0.0589458	-1.21991	0.222499	0.376971	FNIP2	protein_coding
ENSG00000052802.13	3549.24	-0.678345	0.0896655	-7.56529	3.87004e-14	1.24506e-12	MSMO1	protein_coding
ENSG00000052841.15	4425.53	-0.152765	0.0440417	-3.46866	0.000523067	0.00263289	TTC17	protein_coding
ENSG00000052850.8	13.9642	0.776024	0.176584	4.39463	1.1096e-05	8.9554e-05	ALX4	protein_coding
ENSG00000053108.17	89.5085	-0.996524	0.232727	-4.28195	1.85267e-05	0.000141826	FSTL4	protein_coding
ENSG00000053254.16	5254.18	0.242431	0.0690394	3.51149	0.000445598	0.0022965	FOXN3	protein_coding
ENSG00000053328.8	124.605	0.735316	0.196743	3.73745	0.000185897	0.00107746	METTL24	protein_coding
ENSG00000053371.12	3258.69	-0.263132	0.0678217	-3.87976	0.000104561	0.0006527	AKR7A2	protein_coding
ENSG00000053372.5	2592.22	-0.334864	0.0600182	-5.57937	2.41397e-08	3.60615e-07	MRTO4	protein_coding
ENSG00000053438.11	163.632	0.134544	0.133703	1.00629	0.314276	0.482141	NNAT	protein_coding
ENSG00000053501.13	885.263	-0.0932554	0.0658814	-1.41551	0.15692	0.291717	USE1	protein_coding
ENSG00000053524.12	100.674	0.231107	0.092732	2.49221	0.0126953	0.0393542	MCF2L2	protein_coding
ENSG00000053702.15	282.278	0.431639	0.0829084	5.20621	1.92734e-07	2.38772e-06	NRIP2	protein_coding
ENSG00000053747.17	9763.29	-0.126396	0.146269	-0.864134	0.387514	0.557421	LAMA3	protein_coding
ENSG00000053770.12	2880.66	-0.0368838	0.0504293	-0.731397	0.464537	0.630427	AP5M1	protein_coding
ENSG00000053900.11	1343.11	-0.0632741	0.0443738	-1.42594	0.153887	0.28762	ANAPC4	protein_coding
ENSG00000053918.18	4446.81	-0.278486	0.137148	-2.03055	0.042301	0.105448	KCNQ1	protein_coding
ENSG00000054116.12	2525.07	-0.148075	0.0405069	-3.65554	0.000256636	0.0014247	TRAPPC3	protein_coding
ENSG00000054118.15	8553.92	0.112549	0.0348969	3.22518	0.00125895	0.00559221	THRAP3	protein_coding
ENSG00000054148.18	2937.89	-0.107297	0.0690025	-1.55497	0.119952	0.237807	PHPT1	protein_coding
ENSG00000054179.12	1986.35	-0.961685	0.147277	-6.52975	6.58792e-11	1.48433e-09	ENTPD2	protein_coding
ENSG00000054219.11	1644.14	-0.110453	0.0891876	-1.23843	0.215556	0.36839	LY75	protein_coding
ENSG00000054267.22	4004.94	-0.151136	0.0515262	-2.9332	0.00335492	0.0129356	ARID4B	protein_coding
ENSG00000054277.14	127.573	-0.216194	0.0966234	-2.23749	0.025254	0.0693177	OPN3	protein_coding
ENSG00000054282.16	1247.39	-0.0216355	0.048852	-0.442879	0.657853	0.787057	SDCCAG8	protein_coding
ENSG00000054356.14	152.799	0.0180986	0.216346	0.083656	0.93333	0.96374	PTPRN	protein_coding
ENSG00000054392.13	292.549	-0.144948	0.0983162	-1.47431	0.140399	0.268347	HHAT	protein_coding
ENSG00000054523.18	5041.44	0.00678731	0.0573156	0.11842	0.905735	0.94875	KIF1B	protein_coding
ENSG00000054598.9	2111.22	-0.350999	0.130784	-2.68381	0.00727875	0.0247391	FOXC1	protein_coding
ENSG00000054611.14	2450.35	0.0828064	0.0453637	1.82539	0.0679421	0.153348	TBC1D22A	protein_coding
ENSG00000054654.19	12744.6	0.292917	0.086351	3.39216	0.000693435	0.00333913	SYNE2	protein_coding
ENSG00000054690.14	2206.87	-0.135549	0.0881103	-1.5384	0.123952	0.243997	PLEKHH1	protein_coding
ENSG00000054793.14	10552.7	-0.152041	0.0812549	-1.87116	0.0613225	0.141477	ATP9A	protein_coding
ENSG00000054796.13	1.51058	0.622154	0.391294	1.58999	0.111837	0.225239	SPO11	protein_coding
ENSG00000054803.4	14.9595	0.492428	0.210112	2.34365	0.0190961	0.0551586	CBLN4	protein_coding
ENSG00000054938.16	2820.78	0.821968	0.210314	3.90829	9.29535e-05	0.00058944	CHRDL2	protein_coding
ENSG00000054965.11	3988.49	0.179218	0.053939	3.32261	0.000891793	0.00415522	FAM168A	protein_coding
ENSG00000054967.13	485.021	0.553101	0.0737919	7.49542	6.60852e-14	2.0779e-12	RELT	protein_coding
ENSG00000054983.17	4026.42	-0.073255	0.0957281	-0.76524	0.444128	0.611679	GALC	protein_coding
ENSG00000055044.11	3771.68	-0.191791	0.0548127	-3.49903	0.000466954	0.0023906	NOP58	protein_coding
ENSG00000055070.17	6882.16	0.00443765	0.0468012	0.0948191	0.924458	0.95881	SZRD1	protein_coding
ENSG00000055118.16	1495.44	-0.30164	0.183052	-1.64784	0.0993856	0.205858	KCNH2	protein_coding
ENSG00000055130.17	4164.8	0.0229891	0.044794	0.513218	0.607799	0.749036	CUL1	protein_coding
ENSG00000055147.19	1076.11	0.129282	0.0443405	2.91567	0.00354928	0.0135611	FAM114A2	protein_coding
ENSG00000184330.12	23.0984	-2.13513	0.393086	-5.43171	5.58178e-08	7.77877e-07	S100A7A	protein_coding
ENSG00000055208.19	5727.75	0.0683056	0.0452039	1.51105	0.130775	0.254083	TAB2	protein_coding
ENSG00000055211.14	1946.22	0.00918767	0.0480426	0.19124	0.848338	0.914282	GINM1	protein_coding
ENSG00000055332.18	7869.04	0.135561	0.0570198	2.37743	0.0174338	0.0511649	EIF2AK2	protein_coding
ENSG00000055483.19	3557.37	-0.070802	0.0462739	-1.53006	0.126001	0.247002	USP36	protein_coding
ENSG00000055609.19	7016.78	0.143033	0.0564996	2.53158	0.0113551	0.0359517	KMT2C	protein_coding
ENSG00000055732.13	302.469	-0.839624	0.169357	-4.95773	7.13234e-07	7.73398e-06	MCOLN3	protein_coding
ENSG00000055813.6	41.1707	0.265667	0.158621	1.67485	0.093963	0.197427	CCDC85A	protein_coding
ENSG00000055917.16	9076.88	-0.0364696	0.0388983	-0.937565	0.348468	0.517689	PUM2	protein_coding
ENSG00000055950.16	2481.81	-0.116023	0.0551316	-2.10448	0.0353364	0.0912518	MRPL43	protein_coding
ENSG00000055955.17	13.4795	-0.222932	0.143539	-1.55311	0.120398	0.238508	ITIH4	protein_coding
ENSG00000055957.11	17.4061	-0.280725	0.206099	-1.36208	0.173171	0.314188	ITIH1	protein_coding
ENSG00000056050.7	700.39	-0.0207873	0.0555	-0.374547	0.707998	0.822583	HPF1	protein_coding
ENSG00000056097.16	7268.2	-0.0587355	0.0419495	-1.40015	0.161469	0.297944	ZFR	protein_coding
ENSG00000056277.16	522.788	-0.0304267	0.0663697	-0.458443	0.646634	0.778556	ZNF280C	protein_coding
ENSG00000056291.17	15.2508	-0.198926	0.229286	-0.867587	0.385621	0.555411	NPFFR2	protein_coding
ENSG00000056487.16	19.8147	0.000599761	0.211595	0.00283448	0.997738	0.998897	PHF21B	protein_coding
ENSG00000113430.10	14.7158	-2.12313	0.284678	-7.45799	8.78513e-14	2.73261e-12	IRX4	protein_coding
ENSG00000056586.16	4009.64	0.0711158	0.0552195	1.28787	0.19779	0.346278	RC3H2	protein_coding
ENSG00000056736.10	1505.1	-0.313264	0.111264	-2.81552	0.00486988	0.0176854	IL17RB	protein_coding
ENSG00000056972.20	2955.04	-0.000807818	0.0646211	-0.0125008	0.990026	0.994667	TRAF3IP2	protein_coding
ENSG00000056998.20	662.991	-0.260319	0.131441	-1.9805	0.047647	0.115906	GYG2	protein_coding
ENSG00000057019.16	1797.02	-0.100781	0.120329	-0.837548	0.402285	0.571698	DCBLD2	protein_coding
ENSG00000057149.16	115.251	-0.738547	0.345285	-2.13895	0.0324398	0.0851168	SERPINB3	protein_coding
ENSG00000057252.13	2610.14	0.247483	0.0806807	3.06744	0.00215903	0.00888457	SOAT1	protein_coding
ENSG00000057294.15	6158.62	-0.121719	0.0927223	-1.31272	0.189276	0.335285	PKP2	protein_coding
ENSG00000057468.7	23.8942	-0.239125	0.17291	-1.38295	0.166681	0.305339	MSH4	protein_coding
ENSG00000057593.14	110.628	-0.591844	0.242946	-2.43612	0.0148458	0.0447822	F7	protein_coding
ENSG00000057608.17	17121.7	-0.0532942	0.052289	-1.01922	0.308096	0.475484	GDI2	protein_coding
ENSG00000057657.17	3491.52	0.756638	0.0872094	8.6761	4.09555e-18	1.75705e-16	PRDM1	protein_coding
ENSG00000057663.16	2673.3	-0.190521	0.0636962	-2.99109	0.00277986	0.0110103	ATG5	protein_coding
ENSG00000057704.13	1647.41	0.510481	0.104372	4.89098	1.00333e-06	1.05204e-05	TMCC3	protein_coding
ENSG00000057757.10	1844.14	-0.210706	0.0481212	-4.37865	1.19416e-05	9.5751e-05	PITHD1	protein_coding
ENSG00000057935.14	2483.87	-0.206839	0.0453936	-4.55658	5.19934e-06	4.58676e-05	MTA3	protein_coding
ENSG00000058056.9	1147.25	0.111119	0.0841287	1.32082	0.186563	0.331784	USP13	protein_coding
ENSG00000058063.16	6007.13	0.050139	0.0687708	0.729075	0.465956	0.631751	ATP11B	protein_coding
ENSG00000058085.15	14381.1	-0.100112	0.139944	-0.71537	0.47438	0.639175	LAMC2	protein_coding
ENSG00000058091.17	1178.48	0.628731	0.11314	5.55711	2.74281e-08	4.06042e-07	CDK14	protein_coding
ENSG00000058262.10	19486.2	-0.0866723	0.0543942	-1.59341	0.111068	0.224085	SEC61A1	protein_coding
ENSG00000058272.19	5838.9	0.181847	0.0719854	2.52617	0.0115314	0.0364022	PPP1R12A	protein_coding
ENSG00000058335.16	142.642	0.0109462	0.15549	0.0703982	0.943877	0.969456	RASGRF1	protein_coding
ENSG00000058404.20	58.1526	-0.35034	0.173496	-2.0193	0.0434557	0.107672	CAMK2B	protein_coding
ENSG00000058453.17	1112.56	-0.000782226	0.067384	-0.0116085	0.990738	0.9949	CROCC	protein_coding
ENSG00000058600.16	2322.65	-0.196807	0.0418197	-4.70608	2.52523e-06	2.42461e-05	POLR3E	protein_coding
ENSG00000058668.15	12252.4	0.427124	0.119891	3.5626	0.000367204	0.00194399	ATP2B4	protein_coding
ENSG00000058673.17	22.7136	-0.0535099	0.0850871	-0.628884	0.529425	0.685745	ZC3H11A	protein_coding
ENSG00000058729.11	1073.11	-0.0311906	0.0519896	-0.59994	0.548547	0.701077	RIOK2	protein_coding
ENSG00000058799.15	1670.07	0.0190615	0.0455075	0.418865	0.675314	0.799775	YIPF1	protein_coding
ENSG00000058804.12	3764.95	-0.164426	0.0703474	-2.33734	0.0194216	0.0559085	NDC1	protein_coding
ENSG00000058866.15	327.553	0.0950241	0.146055	0.650607	0.5153	0.674267	DGKG	protein_coding
ENSG00000059122.17	1936.88	0.112847	0.0581753	1.93978	0.0524066	0.124786	FLYWCH1	protein_coding
ENSG00000059145.19	746.635	0.146756	0.0643594	2.28025	0.0225928	0.0633184	UNKL	protein_coding
ENSG00000059377.18	1199.69	0.576944	0.101262	5.69751	1.21568e-08	1.91061e-07	TBXAS1	protein_coding
ENSG00000059378.13	4088.26	0.236144	0.0679979	3.47281	0.000515043	0.00259968	PARP12	protein_coding
ENSG00000059573.9	8146.71	-0.159444	0.0589602	-2.70427	0.00684544	0.0234921	ALDH18A1	protein_coding
ENSG00000059588.10	2662.88	-0.346399	0.0650928	-5.32162	1.02845e-07	1.35824e-06	TARBP1	protein_coding
ENSG00000059691.12	797.721	-0.0873685	0.0556473	-1.57004	0.116406	0.232348	GATB	protein_coding
ENSG00000059728.11	5735.12	0.0911158	0.104477	0.872114	0.383146	0.553223	MXD1	protein_coding
ENSG00000059758.8	2029.32	0.168995	0.0548553	3.08073	0.00206491	0.00854584	CDK17	protein_coding
ENSG00000059769.20	528.001	-0.207545	0.0512376	-4.05064	5.10781e-05	0.00034943	DNAJC25	protein_coding
ENSG00000059804.16	2847.71	0.476958	0.115379	4.13385	3.56737e-05	0.000254817	SLC2A3	protein_coding
ENSG00000059915.17	784.868	0.601642	0.202436	2.97202	0.00295852	0.0116262	PSD	protein_coding
ENSG00000060069.17	1827.54	0.139888	0.0522098	2.67933	0.00737688	0.0250242	CTDP1	protein_coding
ENSG00000060138.13	11758.7	-0.135383	0.0662142	-2.04462	0.0408926	0.102556	YBX3	protein_coding
ENSG00000060140.9	536.781	-0.444371	0.129111	-3.44178	0.00057791	0.00286729	STYK1	protein_coding
ENSG00000060237.18	17408.4	0.171415	0.0673506	2.54512	0.010924	0.0347792	WNK1	protein_coding
ENSG00000060339.14	5518.96	-0.208843	0.0461782	-4.52254	6.11021e-06	5.29631e-05	CCAR1	protein_coding
ENSG00000060491.16	4573.62	0.0715755	0.0647812	1.10488	0.269211	0.432072	OGFR	protein_coding
ENSG00000060558.4	680.954	0.0229514	0.1232	0.186294	0.852214	0.916769	GNA15	protein_coding
ENSG00000060566.14	752.917	-0.303875	0.240521	-1.26341	0.206443	0.357296	CREB3L3	protein_coding
ENSG00000060642.11	1008.3	-0.173469	0.050959	-3.40409	0.000663853	0.00322095	PIGV	protein_coding
ENSG00000060656.20	3396.52	-0.33214	0.137851	-2.40941	0.0159784	0.0475833	PTPRU	protein_coding
ENSG00000060688.13	1924.23	-0.0472072	0.0469595	-1.00527	0.314764	0.482576	SNRNP40	protein_coding
ENSG00000060718.22	1838.08	-0.078449	0.21515	-0.364625	0.715392	0.827566	COL11A1	protein_coding
ENSG00000060749.16	3575.24	0.0212119	0.068676	0.30887	0.757421	0.855157	QSER1	protein_coding
ENSG00000060762.19	2177.13	-0.264465	0.0723574	-3.65498	0.0002572	0.00142719	MPC1	protein_coding
ENSG00000060971.19	1915.2	-0.126836	0.0611787	-2.0732	0.0381537	0.0970847	ACAA1	protein_coding
ENSG00000060982.15	1584.14	0.352524	0.128003	2.75403	0.00588657	0.0207171	BCAT1	protein_coding
ENSG00000061273.18	4785.91	0.285522	0.0522779	5.46161	4.71839e-08	6.67383e-07	HDAC7	protein_coding
ENSG00000061337.15	869.853	0.619659	0.106277	5.83059	5.5231e-09	9.28847e-08	LZTS1	protein_coding
ENSG00000061455.11	180.279	0.807309	0.133085	6.06611	1.31043e-09	2.45466e-08	PRDM6	protein_coding
ENSG00000061492.12	2.67552	-0.00341001	0.375427	-0.00908303	0.992753	0.996113	WNT8A	protein_coding
ENSG00000061656.10	439.501	-0.0776478	0.108351	-0.716635	0.473599	0.638525	SPAG4	protein_coding
ENSG00000061676.15	14503.4	-0.231567	0.0492684	-4.70012	2.60013e-06	2.48779e-05	NCKAP1	protein_coding
ENSG00000061794.13	5563.7	-0.347497	0.0855006	-4.06427	4.8183e-05	0.000331935	MRPS35	protein_coding
ENSG00000061918.14	1645.42	0.66594	0.107582	6.19008	6.0135e-10	1.18745e-08	GUCY1B1	protein_coding
ENSG00000061936.10	2576.88	-0.0659038	0.0393068	-1.67665	0.0936107	0.196922	SFSWAP	protein_coding
ENSG00000061938.20	4307.56	-0.157121	0.0842491	-1.86495	0.062188	0.143058	TNK2	protein_coding
ENSG00000061987.16	3089.7	0.0565704	0.0558484	1.01293	0.311095	0.478805	MON2	protein_coding
ENSG00000062038.14	3417.58	-0.319747	0.145986	-2.19026	0.0285056	0.0766839	CDH3	protein_coding
ENSG00000062096.15	5.99021	0.863872	0.220869	3.91124	9.18253e-05	0.000583413	ARSF	protein_coding
ENSG00000062194.16	4217.13	0.0250573	0.0417253	0.60053	0.548153	0.700811	GPBP1	protein_coding
ENSG00000062282.15	1515.37	-0.319852	0.10789	-2.96462	0.00303062	0.0118757	DGAT2	protein_coding
ENSG00000062370.17	243.684	-0.341632	0.0923529	-3.6992	0.000216277	0.00122794	ZNF112	protein_coding
ENSG00000062485.19	12979.8	-0.105465	0.0510011	-2.0679	0.0386494	0.0980648	CS	protein_coding
ENSG00000062524.16	460.287	-0.250177	0.173047	-1.44572	0.148256	0.279613	LTK	protein_coding
ENSG00000062582.14	15.6169	-0.147032	0.0931418	-1.57859	0.114431	0.22945	MRPS24	protein_coding
ENSG00000062598.18	2580.32	0.110064	0.0499822	2.20207	0.0276604	0.0747413	ELMO2	protein_coding
ENSG00000062650.19	4490.89	0.0174893	0.0488672	0.357895	0.720422	0.830846	WAPL	protein_coding
ENSG00000062716.13	12759.7	-0.292868	0.0651393	-4.49602	6.92357e-06	5.92307e-05	VMP1	protein_coding
ENSG00000062725.10	2532.64	0.0181829	0.0444583	0.408987	0.682549	0.80519	APPBP2	protein_coding
ENSG00000062822.15	1982.98	0.179492	0.088155	2.03609	0.0417409	0.104322	POLD1	protein_coding
ENSG00000063015.20	50.4439	-0.294638	0.154544	-1.9065	0.0565852	0.132654	SEZ6	protein_coding
ENSG00000063046.18	16425.6	-0.0542485	0.0521277	-1.04068	0.298022	0.464173	EIF4B	protein_coding
ENSG00000063127.16	97.0349	0.384642	0.133104	2.88978	0.00385515	0.0145323	SLC6A16	protein_coding
ENSG00000063169.11	2482.81	-0.000596472	0.0594906	-0.0100263	0.992	0.995744	BICRA	protein_coding
ENSG00000063176.16	1394.46	0.0404754	0.0836409	0.483919	0.628444	0.765192	SPHK2	protein_coding
ENSG00000063177.13	45214.8	-0.230158	0.0706179	-3.2592	0.00111728	0.00505646	RPL18	protein_coding
ENSG00000063180.9	278.661	0.23474	0.100162	2.3436	0.0190986	0.0551594	CA11	protein_coding
ENSG00000063241.8	2580.23	-0.139583	0.0740884	-1.884	0.0595645	0.138221	ISOC2	protein_coding
ENSG00000063244.13	9558.62	-0.022461	0.0559562	-0.401403	0.688124	0.809205	U2AF2	protein_coding
ENSG00000063245.15	16783	-0.0727309	0.0683208	-1.06455	0.287079	0.452008	EPN1	protein_coding
ENSG00000063322.15	3561.86	0.0511498	0.0465754	1.09822	0.27211	0.435433	MED29	protein_coding
ENSG00000063438.19	14.793	-0.219091	0.143699	-1.52465	0.127346	0.249028	AHRR	protein_coding
ENSG00000063515.3	1.78495	0.085619	0.289819	0.295422	0.767672	0.861886	GSC2	protein_coding
ENSG00000063587.15	2181.22	0.0359966	0.0556728	0.646575	0.517907	0.67661	ZNF275	protein_coding
ENSG00000063601.17	2175.19	0.00641271	0.0544079	0.117864	0.906176	0.948989	MTMR1	protein_coding
ENSG00000063660.9	5366.11	-0.279904	0.108936	-2.56942	0.0101869	0.0328103	GPC1	protein_coding
ENSG00000063761.16	728	-0.233861	0.0511802	-4.56937	4.89191e-06	4.34907e-05	ADCK1	protein_coding
ENSG00000063854.13	1499.84	-0.0585808	0.0524794	-1.11626	0.26431	0.426572	HAGH	protein_coding
ENSG00000063978.16	4562.16	0.107464	0.0431611	2.48983	0.0127804	0.0395804	RNF4	protein_coding
ENSG00000064012.22	3059.85	-0.0201754	0.0568917	-0.354627	0.722869	0.832361	CASP8	protein_coding
ENSG00000064042.18	1184.14	-0.125854	0.110903	-1.13481	0.256456	0.417246	LIMCH1	protein_coding
ENSG00000064102.15	1936.28	-0.28287	0.0782093	-3.61684	0.000298224	0.00162226	INTS13	protein_coding
ENSG00000064115.11	4923.12	0.038297	0.0890002	0.430303	0.666975	0.793927	TM7SF3	protein_coding
ENSG00000244094.2	20.7438	-2.11539	0.398581	-5.3073	1.11261e-07	1.45609e-06	SPRR2F	protein_coding
ENSG00000064199.7	296.716	-0.267974	0.0717323	-3.73575	0.000187155	0.00108424	SPA17	protein_coding
ENSG00000064201.16	89.1324	0.562073	0.158031	3.55673	0.000375495	0.00198255	TSPAN32	protein_coding
ENSG00000064205.10	106.434	0.455145	0.186983	2.43416	0.0149266	0.0449928	CCN5	protein_coding
ENSG00000064218.5	14.9669	-0.451475	0.229129	-1.9704	0.048793	0.118107	DMRT3	protein_coding
ENSG00000064225.12	294.002	0.199545	0.0983267	2.02941	0.0424165	0.105667	ST3GAL6	protein_coding
ENSG00000064270.13	1744.07	-0.68069	0.155319	-4.38253	1.17311e-05	9.41699e-05	ATP2C2	protein_coding
ENSG00000170465.10	240.658	-2.10958	0.415999	-5.07111	3.95493e-07	4.58132e-06	KRT6C	protein_coding
ENSG00000064309.14	616.56	0.484109	0.142709	3.39228	0.000693141	0.00333837	CDON	protein_coding
ENSG00000064313.12	3350.89	-0.245478	0.0531282	-4.62049	3.82826e-06	3.50151e-05	TAF2	protein_coding
ENSG00000064393.16	9788.65	0.0553013	0.0890554	0.620976	0.534615	0.690081	HIPK2	protein_coding
ENSG00000064419.13	4526.97	-0.102587	0.0421539	-2.43363	0.0149484	0.0450393	TNPO3	protein_coding
ENSG00000064489.23	1.71732	0.764477	0.205736	3.71582	0.000202548	0.00116057	BORCS8-MEF2B	protein_coding
ENSG00000064490.14	1313.74	0.0427927	0.0647709	0.660677	0.508819	0.668714	RFXANK	protein_coding
ENSG00000064545.15	1961.57	-0.0729228	0.0650314	-1.12135	0.26214	0.424084	TMEM161A	protein_coding
ENSG00000064547.14	1455.78	-0.132455	0.0763193	-1.73554	0.0826454	0.178855	LPAR2	protein_coding
ENSG00000064601.20	15757.4	-0.043668	0.0787655	-0.554406	0.579301	0.726071	CTSA	protein_coding
ENSG00000064607.17	3840.79	0.0322137	0.0510188	0.631409	0.527773	0.684344	SUGP2	protein_coding
ENSG00000064651.14	15466.4	0.0683775	0.120945	0.56536	0.571829	0.720191	SLC12A2	protein_coding
ENSG00000064652.11	644.702	-0.0524851	0.0714326	-0.734751	0.462491	0.628769	SNX24	protein_coding
ENSG00000064655.19	711.349	-0.106878	0.213112	-0.501511	0.616012	0.755382	EYA2	protein_coding
ENSG00000064666.15	8030.41	0.184342	0.0731565	2.51984	0.0117409	0.0369238	CNN2	protein_coding
ENSG00000064687.13	1799.64	0.0279828	0.0875016	0.319797	0.749122	0.84959	ABCA7	protein_coding
ENSG00000064692.20	479.461	-0.332828	0.181541	-1.83335	0.0667502	0.151289	SNCAIP	protein_coding
ENSG00000064703.12	1102.05	0.0593893	0.039945	1.48678	0.137074	0.263451	DDX20	protein_coding
ENSG00000064726.10	4284.94	-0.0820372	0.045726	-1.7941	0.0727969	0.161995	BTBD1	protein_coding
ENSG00000064763.11	1570.92	-0.284138	0.107185	-2.6509	0.00802772	0.0268836	FAR2	protein_coding
ENSG00000064787.13	4091.45	-0.523511	0.176879	-2.95971	0.00307927	0.0120275	BCAS1	protein_coding
ENSG00000064835.11	3.93247	-0.311688	0.145405	-2.14358	0.0320663	0.0843684	POU1F1	protein_coding
ENSG00000064886.14	304.988	0.973388	0.170634	5.70454	1.16657e-08	1.84166e-07	CHI3L2	protein_coding
ENSG00000064932.16	8003.67	0.224887	0.0671341	3.34982	0.000808655	0.00381518	SBNO2	protein_coding
ENSG00000064933.18	1021.59	-0.209536	0.0516614	-4.05595	4.99305e-05	0.000342819	PMS1	protein_coding
ENSG00000064961.19	3372.06	-0.0938145	0.055449	-1.69191	0.0906637	0.192202	HMG20B	protein_coding
ENSG00000064989.13	2218.14	0.512796	0.0967248	5.3016	1.14794e-07	1.49915e-06	CALCRL	protein_coding
ENSG00000064995.18	1018.23	-0.322305	0.0465939	-6.91732	4.6027e-12	1.20154e-10	TAF11	protein_coding
ENSG00000064999.15	4133.73	0.00422894	0.0599921	0.0704917	0.943802	0.969453	ANKS1A	protein_coding
ENSG00000065000.19	12934.8	-0.0887009	0.0431336	-2.05642	0.039742	0.10033	AP3D1	protein_coding
ENSG00000065029.15	1435.43	-0.1175	0.0495429	-2.37169	0.0177068	0.051864	ZNF76	protein_coding
ENSG00000065054.14	4539.83	-0.158578	0.0793092	-1.9995	0.0455546	0.111842	SLC9A3R2	protein_coding
ENSG00000065057.9	905.35	-0.342091	0.076106	-4.49493	6.95923e-06	5.94634e-05	NTHL1	protein_coding
ENSG00000065060.17	2254.19	0.105205	0.0571008	1.84244	0.0654107	0.14881	UHRF1BP1	protein_coding
ENSG00000065135.12	5741.84	-0.0318794	0.0420341	-0.758417	0.448201	0.615638	GNAI3	protein_coding
ENSG00000065150.21	11859.3	-0.230717	0.061401	-3.75754	0.000171589	0.00100674	IPO5	protein_coding
ENSG00000065154.12	7255.77	-0.0545617	0.10273	-0.531115	0.595339	0.739085	OAT	protein_coding
ENSG00000065183.16	2167.7	-0.150479	0.0609029	-2.4708	0.0134813	0.041397	WDR3	protein_coding
ENSG00000065243.20	4319.47	-0.0375808	0.0566258	-0.663669	0.506902	0.667157	PKN2	protein_coding
ENSG00000065268.11	2574.46	-0.169297	0.0684182	-2.47445	0.0133443	0.0410635	WDR18	protein_coding
ENSG00000065308.5	3954.7	0.286663	0.0634382	4.51877	6.22001e-06	5.382e-05	TRAM2	protein_coding
ENSG00000065320.9	2003.24	0.549509	0.161425	3.40412	0.000663783	0.00322093	NTN1	protein_coding
ENSG00000065325.13	133.114	0.974489	0.179824	5.41913	5.98898e-08	8.28756e-07	GLP2R	protein_coding
ENSG00000065328.17	814.295	-0.194469	0.10048	-1.93539	0.0529423	0.125777	MCM10	protein_coding
ENSG00000065357.20	2295.87	0.105898	0.0969459	1.09235	0.274681	0.438151	DGKA	protein_coding
ENSG00000065361.16	20829.9	-0.318512	0.0836782	-3.8064	0.000141005	0.00084678	ERBB3	protein_coding
ENSG00000065371.17	2.61761	-0.484033	0.263469	-1.83715	0.0661872	0.150233	ROPN1	protein_coding
ENSG00000162040.7	18.7867	-2.10252	0.263834	-7.96907	1.59867e-15	5.80572e-14	HS3ST6	protein_coding
ENSG00000065427.15	8264.92	-0.127778	0.0521744	-2.44904	0.0143236	0.0435137	KARS1	protein_coding
ENSG00000065457.10	1449.9	-0.0641502	0.0499144	-1.2852	0.198721	0.347489	ADAT1	protein_coding
ENSG00000065485.20	2098.14	-0.145442	0.0665773	-2.18455	0.0289217	0.0775871	PDIA5	protein_coding
ENSG00000065491.8	1123.23	-0.154529	0.0537596	-2.87444	0.00404748	0.0151309	TBC1D22B	protein_coding
ENSG00000065518.8	6582.69	-0.303109	0.0614125	-4.93562	7.98972e-07	8.56367e-06	NDUFB4	protein_coding
ENSG00000065526.12	9029.08	0.0468756	0.0458704	1.02191	0.306822	0.474082	SPEN	protein_coding
ENSG00000065534.19	21522.2	0.75665	0.189059	4.0022	6.27564e-05	0.000418331	MYLK	protein_coding
ENSG00000065548.18	4042.36	-0.30072	0.0536588	-5.6043	2.09096e-08	3.16689e-07	ZC3H15	protein_coding
ENSG00000065559.15	1996.59	0.0800221	0.0533671	1.49946	0.133753	0.25841	MAP2K4	protein_coding
ENSG00000065600.13	556.313	-0.0863783	0.0575957	-1.49974	0.133683	0.258346	PACC1	protein_coding
ENSG00000159516.9	7.41992	-2.09813	0.419259	-5.00437	5.60442e-07	6.26351e-06	SPRR2G	protein_coding
ENSG00000065613.15	7968.86	-0.0532984	0.0701132	-0.760176	0.447149	0.614652	SLK	protein_coding
ENSG00000065615.14	1443.18	0.10929	0.0532325	2.05306	0.0400666	0.100957	CYB5R4	protein_coding
ENSG00000065618.21	4449.64	-0.167007	0.207336	-0.805489	0.420538	0.589201	COL17A1	protein_coding
ENSG00000065621.15	1717.52	-0.494459	0.0981456	-5.03801	4.70386e-07	5.36176e-06	GSTO2	protein_coding
ENSG00000065665.21	460.845	-0.0916194	0.0682649	-1.34212	0.179558	0.32272	SEC61A2	protein_coding
ENSG00000065675.15	271.224	0.974233	0.128641	7.57326	3.63963e-14	1.17596e-12	PRKCQ	protein_coding
ENSG00000065717.15	1543.56	0.0890391	0.110978	0.802311	0.422373	0.590912	TLE2	protein_coding
ENSG00000065802.12	1203.96	-0.0403232	0.0543006	-0.742593	0.457728	0.624391	ASB1	protein_coding
ENSG00000065809.13	7246.72	0.0350438	0.111042	0.315591	0.752313	0.851724	FAM107B	protein_coding
ENSG00000065833.9	1744.36	-0.379871	0.108966	-3.48613	0.000490071	0.00249126	ME1	protein_coding
ENSG00000065882.16	4679.31	0.292912	0.067176	4.36037	1.29842e-05	0.000103336	TBC1D1	protein_coding
ENSG00000065883.16	5045.19	-0.0622323	0.0384514	-1.61846	0.105563	0.215692	CDK13	protein_coding
ENSG00000065911.13	3731.69	-0.248975	0.0709046	-3.51141	0.000445729	0.0022967	MTHFD2	protein_coding
ENSG00000065923.10	2249.23	0.537407	0.0963031	5.58037	2.40008e-08	3.58867e-07	SLC9A7	protein_coding
ENSG00000065970.9	2334.01	0.141825	0.0530701	2.67241	0.00753087	0.0254641	FOXJ2	protein_coding
ENSG00000065978.19	33232.1	-0.134385	0.0517322	-2.5977	0.00938494	0.0306751	YBX1	protein_coding
ENSG00000065989.16	1870.47	0.0504606	0.0799877	0.630855	0.528135	0.684652	PDE4A	protein_coding
ENSG00000066027.12	4928.56	-0.313178	0.0443506	-7.06142	1.64809e-12	4.53575e-11	PPP2R5A	protein_coding
ENSG00000066032.18	21.9399	0.130927	0.229465	0.570576	0.568287	0.717327	CTNNA2	protein_coding
ENSG00000066044.15	5211.55	-0.105775	0.0379792	-2.78508	0.00535144	0.0191348	ELAVL1	protein_coding
ENSG00000066056.14	1598.58	0.538476	0.093559	5.75547	8.64017e-09	1.39627e-07	TIE1	protein_coding
ENSG00000066084.13	4864.13	-0.0680302	0.0584991	-1.16293	0.244859	0.403869	DIP2B	protein_coding
ENSG00000066117.15	4671.41	0.0111459	0.048302	0.230754	0.817506	0.894509	SMARCD1	protein_coding
ENSG00000066135.13	995.987	0.0369385	0.0474916	0.777792	0.436692	0.604873	KDM4A	protein_coding
ENSG00000066136.20	3043.06	-0.0657157	0.0378394	-1.7367	0.0824398	0.17852	NFYC	protein_coding
ENSG00000066185.13	151.298	-0.211878	0.0980523	-2.16086	0.0307059	0.0814412	ZMYND12	protein_coding
ENSG00000066230.12	1698.25	-0.141839	0.228264	-0.62138	0.53435	0.689922	SLC9A3	protein_coding
ENSG00000066248.15	768.8	-0.554698	0.111667	-4.96741	6.78514e-07	7.40975e-06	NGEF	protein_coding
ENSG00000066279.18	2782.38	-0.253654	0.0938354	-2.70318	0.00686802	0.0235513	ASPM	protein_coding
ENSG00000141741.12	6519.41	-2.08138	0.157984	-13.1746	1.22919e-39	1.4505e-37	MIEN1	protein_coding
ENSG00000066322.15	6950.16	-0.270374	0.0606481	-4.45807	8.27016e-06	6.92459e-05	ELOVL1	protein_coding
ENSG00000204983.14	883.723	-2.07097	0.27789	-7.45247	9.16089e-14	2.84409e-12	PRSS1	protein_coding
ENSG00000066379.15	785.764	-0.40923	0.0665534	-6.1489	7.80224e-10	1.51393e-08	POLR1H	protein_coding
ENSG00000066382.16	93.1208	0.10537	0.135505	0.777612	0.436798	0.604914	MPPED2	protein_coding
ENSG00000066405.13	45268.1	-0.132516	0.231465	-0.572511	0.566976	0.716183	CLDN18	protein_coding
ENSG00000066422.5	1927.29	-0.041143	0.0433346	-0.949425	0.342404	0.511384	ZBTB11	protein_coding
ENSG00000066427.24	1391.04	0.0241958	0.044249	0.546811	0.584508	0.730336	ATXN3	protein_coding
ENSG00000066455.13	3343.24	-0.165883	0.0403395	-4.11217	3.91955e-05	0.000277037	GOLGA5	protein_coding
ENSG00000066468.23	3810.43	0.382195	0.153938	2.48278	0.0130361	0.0402509	FGFR2	protein_coding
ENSG00000066557.6	1050.93	-0.131926	0.0452225	-2.91727	0.00353108	0.0135031	LRRC40	protein_coding
ENSG00000066583.12	1862.77	0.00991292	0.0591352	0.167631	0.866873	0.925216	ISOC1	protein_coding
ENSG00000066629.18	1523.8	0.529617	0.130351	4.06302	4.84413e-05	0.000333525	EML1	protein_coding
ENSG00000066651.20	981.768	-0.151359	0.0635289	-2.38252	0.0171946	0.0505804	TRMT11	protein_coding
ENSG00000066654.14	3192.97	0.0362268	0.0433443	0.835792	0.403272	0.572605	THUMPD1	protein_coding
ENSG00000066697.15	919.934	-0.113582	0.050169	-2.264	0.0235744	0.0655136	MSANTD3	protein_coding
ENSG00000066735.14	1361.58	-0.00320323	0.171289	-0.0187007	0.98508	0.99238	KIF26A	protein_coding
ENSG00000066739.12	2729.23	0.0105184	0.0564371	0.186374	0.852151	0.916741	ATG2B	protein_coding
ENSG00000066777.9	6086.58	-0.158599	0.063228	-2.50837	0.0121291	0.0379192	ARFGEF1	protein_coding
ENSG00000066813.14	9.36067	-0.14802	0.240135	-0.616403	0.537629	0.692032	ACSM2B	protein_coding
ENSG00000066827.16	704.816	0.0930783	0.0573215	1.62379	0.10442	0.213843	ZFAT	protein_coding
ENSG00000066855.16	2276.43	-0.344485	0.0620943	-5.54777	2.8933e-08	4.26013e-07	MTFR1	protein_coding
ENSG00000066923.17	277.84	-0.199855	0.125059	-1.59809	0.110023	0.222555	STAG3	protein_coding
ENSG00000066926.12	1233.31	0.167475	0.064025	2.61578	0.0089025	0.0293285	FECH	protein_coding
ENSG00000066933.16	2148.72	0.230139	0.0656797	3.50396	0.000458401	0.00235336	MYO9A	protein_coding
ENSG00000067048.17	1216.46	0.0697727	0.264111	0.26418	0.791641	0.877406	DDX3Y	protein_coding
ENSG00000067057.18	7334.73	-0.185262	0.088884	-2.08431	0.0371316	0.0949717	PFKP	protein_coding
ENSG00000067064.11	3309.39	-0.515673	0.0759688	-6.78796	1.13734e-11	2.83792e-10	IDI1	protein_coding
ENSG00000067066.17	5958.8	0.416046	0.0552555	7.52949	5.09394e-14	1.61302e-12	SP100	protein_coding
ENSG00000067082.15	13633.8	0.0589962	0.0717954	0.821727	0.411233	0.58037	KLF6	protein_coding
ENSG00000067113.17	1961.17	0.555807	0.084331	6.59078	4.3751e-11	1.01408e-09	PLPP1	protein_coding
ENSG00000067141.17	6153.28	0.147141	0.0878661	1.67461	0.0940109	0.197499	NEO1	protein_coding
ENSG00000067167.8	17894.4	0.111617	0.0672229	1.66041	0.0968325	0.20199	TRAM1	protein_coding
ENSG00000067177.15	956.454	-0.267092	0.111874	-2.38744	0.0169664	0.0500408	PHKA1	protein_coding
ENSG00000067182.8	8093.21	0.0663648	0.0568566	1.16723	0.243117	0.401944	TNFRSF1A	protein_coding
ENSG00000067191.16	494.873	-0.406104	0.106213	-3.82347	0.000131588	0.000797532	CACNB1	protein_coding
ENSG00000067208.14	1962.4	0.0881009	0.0511151	1.72358	0.0847842	0.182385	EVI5	protein_coding
ENSG00000067221.14	674.823	-0.102147	0.0657768	-1.55293	0.120439	0.238551	STOML1	protein_coding
ENSG00000067225.18	68789.8	-0.181431	0.076233	-2.37996	0.0173145	0.0508786	PKM	protein_coding
ENSG00000067248.10	2246.8	-0.0360489	0.0461367	-0.781351	0.434596	0.602819	DHX29	protein_coding
ENSG00000067334.14	3058.5	-0.068617	0.0408271	-1.68067	0.0928267	0.195733	DNTTIP2	protein_coding
ENSG00000067365.15	716.112	-0.0152782	0.0428569	-0.356493	0.721471	0.831596	METTL22	protein_coding
ENSG00000067369.14	2272.73	0.0779892	0.0569155	1.37026	0.170605	0.310562	TP53BP1	protein_coding
ENSG00000067445.21	229.733	0.445202	0.11456	3.88619	0.000101828	0.000638311	TRO	protein_coding
ENSG00000067533.6	1732.72	-0.431236	0.0502354	-8.58431	9.1385e-18	3.83692e-16	RRP15	protein_coding
ENSG00000067560.13	30324.4	0.00927533	0.0445382	0.208256	0.835029	0.905607	RHOA	protein_coding
ENSG00000067596.12	4051.57	0.0311154	0.045978	0.676746	0.498567	0.659743	DHX8	protein_coding
ENSG00000067606.17	1339.25	-0.247993	0.0728018	-3.40641	0.000658221	0.00319999	PRKCZ	protein_coding
ENSG00000067646.12	428.389	0.0559227	0.275782	0.202779	0.839308	0.908346	ZFY	protein_coding
ENSG00000067704.10	8350.19	-0.197003	0.0580014	-3.39652	0.000682496	0.00329631	IARS2	protein_coding
ENSG00000067715.14	489.598	-0.973519	0.191213	-5.09129	3.55636e-07	4.16471e-06	SYT1	protein_coding
ENSG00000067798.16	218.328	0.964151	0.143098	6.73769	1.60924e-11	3.94556e-10	NAV3	protein_coding
ENSG00000067829.19	4358.34	-0.196944	0.0596232	-3.30314	0.000956074	0.00440929	IDH3G	protein_coding
ENSG00000067836.13	531.433	-0.243771	0.0666042	-3.65999	0.000252224	0.00140337	ROGDI	protein_coding
ENSG00000067840.12	251.174	0.599676	0.179785	3.33551	0.000851424	0.00399094	PDZD4	protein_coding
ENSG00000067842.17	8.03272	0.689832	0.206528	3.34015	0.000837343	0.00393369	ATP2B3	protein_coding
ENSG00000067900.8	6179.86	-0.0661445	0.0562838	-1.1752	0.239916	0.398279	ROCK1	protein_coding
ENSG00000067955.15	3721.94	-0.139493	0.0573745	-2.43128	0.0150457	0.0452632	CBFB	protein_coding
ENSG00000067992.16	3124.7	-0.0117739	0.0831246	-0.141642	0.887363	0.937588	PDK3	protein_coding
ENSG00000068001.14	2268.98	0.0676295	0.0538358	1.25622	0.209037	0.360421	HYAL2	protein_coding
ENSG00000068024.17	2083.25	0.0500672	0.0890098	0.562491	0.573781	0.721633	HDAC4	protein_coding
ENSG00000068028.17	1388.81	-0.040847	0.0525937	-0.776652	0.437364	0.60548	RASSF1	protein_coding
ENSG00000068078.20	2921.52	-0.726801	0.155438	-4.67581	2.92792e-06	2.76858e-05	FGFR3	protein_coding
ENSG00000068079.8	2138.75	0.439855	0.0868297	5.06572	4.06852e-07	4.69852e-06	IFI35	protein_coding
ENSG00000068097.15	1221.53	0.0328804	0.0499815	0.657851	0.510634	0.670132	HEATR6	protein_coding
ENSG00000068120.15	4495.88	-0.225452	0.0583386	-3.86454	0.0001113	0.000688476	COASY	protein_coding
ENSG00000068137.15	1522.96	-0.15232	0.0684119	-2.22651	0.02598	0.0709961	PLEKHH3	protein_coding
ENSG00000068305.17	3937.97	0.216994	0.0694984	3.12229	0.00179451	0.0075889	MEF2A	protein_coding
ENSG00000068308.14	4264.53	0.102848	0.0422036	2.43696	0.0148113	0.0447057	OTUD5	protein_coding
ENSG00000068323.17	4234.45	0.14727	0.050436	2.91993	0.00350105	0.0134049	TFE3	protein_coding
ENSG00000068354.16	1074.24	0.0586292	0.0478254	1.2259	0.220236	0.374274	TBC1D25	protein_coding
ENSG00000068366.20	6111.11	0.107684	0.0718607	1.49851	0.134001	0.258818	ACSL4	protein_coding
ENSG00000068383.19	1771.08	-0.0126362	0.0686088	-0.184177	0.853874	0.917853	INPP5A	protein_coding
ENSG00000068394.11	1266.42	-0.0573848	0.048677	-1.17889	0.238442	0.396448	GPKOW	protein_coding
ENSG00000068400.13	2524.28	0.0297752	0.0471143	0.631978	0.527402	0.684046	GRIPAP1	protein_coding
ENSG00000068438.15	2864.16	-0.167448	0.0523836	-3.19657	0.00139073	0.0060907	FTSJ1	protein_coding
ENSG00000068489.13	2522.97	-0.372661	0.0793665	-4.69545	2.66024e-06	2.54037e-05	PRR11	protein_coding
ENSG00000068615.19	554.841	0.266437	0.173731	1.53362	0.125123	0.245683	REEP1	protein_coding
ENSG00000068650.18	11140.8	-0.197507	0.0934036	-2.11455	0.034468	0.0894238	ATP11A	protein_coding
ENSG00000068654.16	5549.59	-0.0654678	0.0505993	-1.29385	0.195718	0.34369	POLR1A	protein_coding
ENSG00000068697.7	17494.9	-0.104526	0.045592	-2.29263	0.0218691	0.0616413	LAPTM4A	protein_coding
ENSG00000068724.17	3309.12	0.0658661	0.0554416	1.18803	0.234824	0.391927	TTC7A	protein_coding
ENSG00000068745.15	3210.17	-0.261241	0.0499726	-5.22769	1.71639e-07	2.1568e-06	IP6K2	protein_coding
ENSG00000068781.21	5.39448	0.238055	0.208084	1.14403	0.25261	0.412999	STON1-GTF2A1L	protein_coding
ENSG00000068784.13	1125.71	0.094024	0.0437548	2.14889	0.0316434	0.0834643	SRBD1	protein_coding
ENSG00000068796.19	2610.76	0.158405	0.0577059	2.74505	0.00605025	0.0212184	KIF2A	protein_coding
ENSG00000141579.7	215.404	-2.06842	0.237488	-8.70955	3.05078e-18	1.32618e-16	ZNF750	protein_coding
ENSG00000068878.15	5864.1	-0.0842915	0.0482531	-1.74686	0.0806613	0.17562	PSME4	protein_coding
ENSG00000068885.15	679.22	-0.278687	0.0649646	-4.28983	1.78812e-05	0.000137377	IFT80	protein_coding
ENSG00000068903.20	3005.53	-0.00399131	0.0574801	-0.0694381	0.944641	0.969927	SIRT2	protein_coding
ENSG00000068912.14	4503.07	-0.0869741	0.0476035	-1.82705	0.067692	0.152938	ERLEC1	protein_coding
ENSG00000068971.14	1187.45	0.0922265	0.0578483	1.59428	0.110873	0.22381	PPP2R5B	protein_coding
ENSG00000068976.14	225	0.893311	0.176224	5.06918	3.99541e-07	4.62276e-06	PYGM	protein_coding
ENSG00000069011.16	4791.43	-0.0914886	0.117478	-0.778771	0.436114	0.604329	PITX1	protein_coding
ENSG00000069018.19	14.0191	-0.363069	0.192615	-1.88495	0.0594369	0.138	TRPC7	protein_coding
ENSG00000069020.18	2894.99	0.163998	0.0902615	1.81692	0.0692299	0.155719	MAST4	protein_coding
ENSG00000069122.19	2334.32	0.329369	0.0842692	3.90853	9.2859e-05	0.000589152	ADGRF5	protein_coding
ENSG00000069188.17	563.002	-0.383414	0.172135	-2.22741	0.0259202	0.0708691	SDK2	protein_coding
ENSG00000069206.15	2.71165	-0.0894616	0.369963	-0.241812	0.808925	0.888756	ADAM7	protein_coding
ENSG00000069248.12	2964.97	-0.133082	0.0459279	-2.89763	0.00375999	0.0142324	NUP133	protein_coding
ENSG00000069275.13	18649.6	-0.242613	0.053919	-4.49958	6.80863e-06	5.83285e-05	NUCKS1	protein_coding
ENSG00000069329.18	11050.5	-0.241528	0.0444953	-5.42818	5.69319e-08	7.91475e-07	VPS35	protein_coding
ENSG00000069345.12	3638.72	-0.148048	0.0397236	-3.72695	0.000193812	0.00111754	DNAJA2	protein_coding
ENSG00000069399.15	9324.05	-0.054856	0.074161	-0.739688	0.459489	0.626001	BCL3	protein_coding
ENSG00000069424.15	2495.16	0.606305	0.0876662	6.91607	4.64347e-12	1.21154e-10	KCNAB2	protein_coding
ENSG00000069431.11	1303.14	0.841203	0.152412	5.51926	3.40435e-08	4.95186e-07	ABCC9	protein_coding
ENSG00000069482.7	662.41	-0.287872	0.241523	-1.1919	0.233299	0.389992	GAL	protein_coding
ENSG00000089199.10	378.149	-2.05234	0.252384	-8.1318	4.22953e-16	1.59484e-14	CHGB	protein_coding
ENSG00000069509.6	862.38	-0.203283	0.0719684	-2.82461	0.00473384	0.0172588	FUNDC1	protein_coding
ENSG00000069535.14	1860.73	-0.304191	0.163478	-1.86074	0.0627806	0.144118	MAOB	protein_coding
ENSG00000069667.16	1015.54	0.611011	0.0950859	6.42588	1.31109e-10	2.84213e-09	RORA	protein_coding
ENSG00000069696.7	102.857	-0.578538	0.107603	-5.37661	7.59009e-08	1.03033e-06	DRD4	protein_coding
ENSG00000069702.11	2488.47	0.323699	0.125595	2.57732	0.00995693	0.0322004	TGFBR3	protein_coding
ENSG00000069764.10	479.779	-0.388324	0.156132	-2.48715	0.0128772	0.0398179	PLA2G10	protein_coding
ENSG00000069812.11	348.949	-0.423687	0.186991	-2.26582	0.0234625	0.0652654	HES2	protein_coding
ENSG00000069849.11	8147.87	-0.168708	0.0631182	-2.67288	0.00752025	0.0254316	ATP1B3	protein_coding
ENSG00000069869.16	1404.54	0.025701	0.08034	0.319903	0.749042	0.849556	NEDD4	protein_coding
ENSG00000069943.10	627.785	0.00733777	0.0495476	0.148095	0.882267	0.934653	PIGB	protein_coding
ENSG00000069956.12	4811.83	-0.357181	0.062279	-5.73518	9.74089e-09	1.55778e-07	MAPK6	protein_coding
ENSG00000069966.19	960.855	0.0585622	0.0689349	0.849529	0.395587	0.565085	GNB5	protein_coding
ENSG00000069974.16	2804.66	0.225252	0.0790641	2.84898	0.0043859	0.0161846	RAB27A	protein_coding
ENSG00000069998.12	1899.84	-0.094937	0.0641858	-1.4791	0.139114	0.266473	HDHD5	protein_coding
ENSG00000070010.19	2582.59	-0.0305159	0.0457968	-0.666334	0.505198	0.665465	UFD1	protein_coding
ENSG00000070018.9	3345.03	-0.0764482	0.0626181	-1.22087	0.222137	0.376552	LRP6	protein_coding
ENSG00000070019.5	1926.23	-0.549297	0.217376	-2.52694	0.0115061	0.0363454	GUCY2C	protein_coding
ENSG00000070031.4	34.8904	-0.61414	0.182589	-3.36351	0.000769574	0.00365638	SCT	protein_coding
ENSG00000070047.13	4255.9	0.0314488	0.0574947	0.546987	0.584388	0.73027	PHRF1	protein_coding
ENSG00000070061.16	2817.37	-0.128147	0.0479629	-2.6718	0.0075445	0.0255032	ELP1	protein_coding
ENSG00000070081.17	3645.91	-0.143176	0.0722929	-1.98049	0.0476481	0.115906	NUCB2	protein_coding
ENSG00000070087.14	3056.41	-0.677848	0.135271	-5.01103	5.41383e-07	6.08227e-06	PFN2	protein_coding
ENSG00000070159.14	2626.02	-0.340034	0.0850732	-3.99695	6.41633e-05	0.000426611	PTPN3	protein_coding
ENSG00000070182.21	139.68	0.224862	0.119245	1.88571	0.0593344	0.137827	SPTB	protein_coding
ENSG00000070190.13	657.189	0.62326	0.115498	5.3963	6.80285e-08	9.31426e-07	DAPP1	protein_coding
ENSG00000070193.5	356.302	0.748674	0.194676	3.84575	0.000120184	0.000736949	FGF10	protein_coding
ENSG00000070214.16	11376	-0.203832	0.0564366	-3.61169	0.000304207	0.00164971	SLC44A1	protein_coding
ENSG00000070269.14	1058.14	-0.0044293	0.0550033	-0.0805278	0.935817	0.96516	TMEM260	protein_coding
ENSG00000070366.14	1557.35	0.304817	0.0547672	5.56569	2.61121e-08	3.88194e-07	SMG6	protein_coding
ENSG00000070367.16	3647.11	0.096513	0.0468572	2.05973	0.0394247	0.0996796	EXOC5	protein_coding
ENSG00000070371.16	303.06	-0.195183	0.108347	-1.80146	0.0716305	0.159893	CLTCL1	protein_coding
ENSG00000070388.11	12.4644	-0.270246	0.113927	-2.37211	0.0176869	0.0518121	FGF22	protein_coding
ENSG00000070404.10	2497.61	-0.116696	0.134262	-0.869166	0.384756	0.554777	FSTL3	protein_coding
ENSG00000070413.20	7666.17	-0.0230493	0.0558528	-0.412679	0.679842	0.80317	DGCR2	protein_coding
ENSG00000070423.18	3814.97	-0.2766	0.0606624	-4.55966	5.12377e-06	4.53146e-05	RNF126	protein_coding
ENSG00000070444.15	2006.51	0.108147	0.0479954	2.25327	0.0242419	0.0670468	MNT	protein_coding
ENSG00000070476.15	2124.63	-0.0935003	0.0502334	-1.86132	0.0626992	0.143991	ZXDC	protein_coding
ENSG00000070495.15	1530.7	-0.046169	0.0462479	-0.998294	0.318137	0.486282	JMJD6	protein_coding
ENSG00000070501.12	925.136	-0.096333	0.0661645	-1.45596	0.145403	0.275489	POLB	protein_coding
ENSG00000070526.15	3780.73	-0.284543	0.153022	-1.8595	0.0629568	0.144462	ST6GALNAC1	protein_coding
ENSG00000070540.13	1165.27	-0.0404337	0.0779765	-0.518537	0.604084	0.746203	WIPI1	protein_coding
ENSG00000070601.10	57.0261	-0.0415555	0.192003	-0.216432	0.828651	0.901864	FRMPD1	protein_coding
ENSG00000070610.14	3728.48	-0.196569	0.062794	-3.13037	0.00174584	0.00741046	GBA2	protein_coding
ENSG00000070614.15	6729.66	0.224448	0.0693192	3.23789	0.00120418	0.00538389	NDST1	protein_coding
ENSG00000070669.17	68.3266	-0.240709	0.0955586	-2.51897	0.0117698	0.0369911	ASNS	protein_coding
ENSG00000070718.12	1159	-0.0853813	0.0666897	-1.28028	0.200448	0.349712	AP3M2	protein_coding
ENSG00000070729.14	30.1002	0.130182	0.180393	0.721662	0.470502	0.63569	CNGB1	protein_coding
ENSG00000070731.11	183.471	-0.387026	0.138336	-2.79772	0.0051464	0.0185228	ST6GALNAC2	protein_coding
ENSG00000070748.19	9.07215	0.767408	0.265613	2.88919	0.00386233	0.0145527	CHAT	protein_coding
ENSG00000070756.17	137498	-0.434346	0.0650164	-6.68057	2.38012e-11	5.72998e-10	PABPC1	protein_coding
ENSG00000070759.17	342.397	0.166944	0.0636926	2.62109	0.00876504	0.0289431	TESK2	protein_coding
ENSG00000070761.8	1189.94	-0.119881	0.0526295	-2.27783	0.0227366	0.0636418	CFAP20	protein_coding
ENSG00000070770.10	2136.53	-0.0970812	0.0436087	-2.22619	0.0260015	0.0710349	CSNK2A2	protein_coding
ENSG00000070778.13	1448.65	0.108189	0.0659723	1.63991	0.101023	0.208373	PTPN21	protein_coding
ENSG00000070785.17	902.693	-0.161265	0.0430178	-3.74879	0.000177693	0.00103638	EIF2B3	protein_coding
ENSG00000070808.16	47.0406	0.224208	0.158882	1.41117	0.158196	0.293478	CAMK2A	protein_coding
ENSG00000070814.22	5651.88	-0.13188	0.0630758	-2.09082	0.0365438	0.0937907	TCOF1	protein_coding
ENSG00000070831.17	15874.4	-0.0980361	0.0458842	-2.1366	0.0326306	0.0855227	CDC42	protein_coding
ENSG00000070882.13	3897.96	-0.195107	0.0692509	-2.8174	0.00484141	0.0175976	OSBPL3	protein_coding
ENSG00000147381.11	600.963	-2.0498	0.515461	-3.97664	6.9896e-05	0.000459941	MAGEA4	protein_coding
ENSG00000170890.14	31.7815	-2.04045	0.242682	-8.40791	4.1737e-17	1.68068e-15	PLA2G1B	protein_coding
ENSG00000070950.10	1237.15	-0.100652	0.0625429	-1.60932	0.107546	0.218737	RAD18	protein_coding
ENSG00000070961.16	4809.69	-0.0534345	0.0674091	-0.792689	0.427959	0.596285	ATP2B1	protein_coding
ENSG00000070985.13	78.8263	-0.504563	0.197068	-2.56036	0.0104565	0.0335207	TRPM5	protein_coding
ENSG00000071051.14	5357.37	-0.28176	0.05914	-4.76429	1.89516e-06	1.87602e-05	NCK2	protein_coding
ENSG00000071054.16	9394.76	-0.0607043	0.0640438	-0.947856	0.343203	0.512264	MAP4K4	protein_coding
ENSG00000071073.13	3834.45	0.00315487	0.0932897	0.033818	0.973022	0.985743	MGAT4A	protein_coding
ENSG00000071082.11	28989.7	-0.352658	0.0678842	-5.19499	2.04727e-07	2.52296e-06	RPL31	protein_coding
ENSG00000071127.17	20598.5	-0.0118414	0.0512619	-0.230997	0.817317	0.894381	WDR1	protein_coding
ENSG00000071189.21	3342.55	-0.169205	0.0512493	-3.30161	0.000961323	0.00443006	SNX13	protein_coding
ENSG00000071203.9	4.31083	0.125604	0.300205	0.418393	0.67566	0.799996	MS4A12	protein_coding
ENSG00000071205.12	1133.49	0.277609	0.100275	2.76848	0.00563185	0.019985	ARHGAP10	protein_coding
ENSG00000071242.12	2672.63	0.196532	0.0785532	2.5019	0.0123529	0.0384868	RPS6KA2	protein_coding
ENSG00000071243.16	647.917	-0.087062	0.0490975	-1.77325	0.0761874	0.16796	ING3	protein_coding
ENSG00000071246.11	1230.98	0.75203	0.0777354	9.67423	3.88014e-22	2.10512e-20	VASH1	protein_coding
ENSG00000071282.12	1552.52	0.254673	0.0852194	2.98844	0.00280407	0.0110898	LMCD1	protein_coding
ENSG00000071462.12	4771.76	-0.425768	0.0524168	-8.12273	4.55828e-16	1.71486e-14	BUD23	protein_coding
ENSG00000071537.14	8692.69	0.189446	0.0552772	3.4272	0.000609834	0.00300357	SEL1L	protein_coding
ENSG00000071539.14	1515.33	-0.550925	0.0994553	-5.53942	3.0347e-08	4.44867e-07	TRIP13	protein_coding
ENSG00000071553.18	10516.6	-0.172561	0.0576132	-2.99516	0.00274297	0.0108808	ATP6AP1	protein_coding
ENSG00000071564.17	6986.6	-0.109205	0.0658319	-1.65884	0.0971471	0.202491	TCF3	protein_coding
ENSG00000071575.11	3206.15	0.391163	0.100093	3.908	9.30636e-05	0.000589886	TRIB2	protein_coding
ENSG00000071626.17	7624.85	-0.0973515	0.0449406	-2.16623	0.030294	0.0805278	DAZAP1	protein_coding
ENSG00000071655.18	2010.01	-0.0140373	0.0648843	-0.216343	0.82872	0.901875	MBD3	protein_coding
ENSG00000135222.6	2.68034	-2.03249	0.53854	-3.77407	0.000160603	0.000951019	CSN2	protein_coding
ENSG00000071794.16	1354.91	-0.16948	0.11232	-1.5089	0.131325	0.25495	HLTF	protein_coding
ENSG00000071859.15	3621.64	-0.279386	0.0558499	-5.00245	5.66056e-07	6.31621e-06	FAM50A	protein_coding
ENSG00000071889.17	2521.05	-0.283702	0.0702858	-4.03641	5.42765e-05	0.000367884	FAM3A	protein_coding
ENSG00000071894.17	8241.37	-0.183218	0.0592331	-3.09318	0.00198024	0.00824887	CPSF1	protein_coding
ENSG00000071909.19	60.9695	-0.0306677	0.161642	-0.189726	0.849524	0.915015	MYO3B	protein_coding
ENSG00000071967.12	6458.63	0.624205	0.12736	4.90109	9.53077e-07	1.00534e-05	CYBRD1	protein_coding
ENSG00000071991.9	171.345	0.587671	0.239277	2.45603	0.0140482	0.0428013	CDH19	protein_coding
ENSG00000071994.11	2966.39	-0.32473	0.0493553	-6.57943	4.72269e-11	1.0885e-09	PDCD2	protein_coding
ENSG00000072041.17	25.1542	-0.504453	0.26481	-1.90496	0.0567854	0.133042	SLC6A15	protein_coding
ENSG00000072042.13	3724.21	-0.276149	0.0565789	-4.88077	1.05673e-06	1.10379e-05	RDH11	protein_coding
ENSG00000072062.15	4622.01	0.0571209	0.0481428	1.18649	0.23543	0.392659	PRKACA	protein_coding
ENSG00000072071.16	3683.59	-0.187018	0.0900151	-2.07763	0.0377437	0.0962178	ADGRL1	protein_coding
ENSG00000072080.11	1.42263	-0.640092	0.388239	-1.64871	0.0992079	0.205576	SPP2	protein_coding
ENSG00000072110.15	26284.1	0.113863	0.0959593	1.18657	0.235396	0.392619	ACTN1	protein_coding
ENSG00000072121.17	2717.83	0.306573	0.0503818	6.085	1.16494e-09	2.20661e-08	ZFYVE26	protein_coding
ENSG00000072133.11	139.736	-0.5798	0.201183	-2.88196	0.00395209	0.014842	RPS6KA6	protein_coding
ENSG00000072134.15	1195.75	0.130013	0.0665845	1.95261	0.0508663	0.121956	EPN2	protein_coding
ENSG00000072135.13	6067.85	-0.000620132	0.0605382	-0.0102436	0.991827	0.99559	PTPN18	protein_coding
ENSG00000072163.20	2343.47	0.517181	0.155082	3.33489	0.000853319	0.00399715	LIMS2	protein_coding
ENSG00000072182.13	9.96299	-0.252425	0.14546	-1.73535	0.0826787	0.178888	ASIC4	protein_coding
ENSG00000072195.15	1695.98	0.344763	0.201743	1.70892	0.0874659	0.187001	SPEG	protein_coding
ENSG00000072201.14	705.002	-0.460251	0.0891344	-5.16356	2.42291e-07	2.94314e-06	LNX1	protein_coding
ENSG00000072210.19	5362.87	-0.231351	0.0724483	-3.19332	0.00140645	0.00614859	ALDH3A2	protein_coding
ENSG00000072274.13	14960.7	-0.175627	0.101491	-1.73047	0.0835455	0.180388	TFRC	protein_coding
ENSG00000072310.17	9329.16	-0.0435527	0.092547	-0.470601	0.637926	0.772008	SREBF1	protein_coding
ENSG00000072315.3	4.04795	0.601654	0.221341	2.71822	0.00656349	0.0226937	TRPC5	protein_coding
ENSG00000072364.13	8101.02	0.142458	0.061641	2.3111	0.0208276	0.0592281	AFF4	protein_coding
ENSG00000072401.15	2074.85	0.072056	0.0493537	1.45999	0.144292	0.273848	UBE2D1	protein_coding
ENSG00000072415.10	2130.14	-0.110811	0.0470813	-2.35361	0.018592	0.0539463	MPP5	protein_coding
ENSG00000072422.17	1458.81	-0.0689283	0.0948102	-0.727013	0.467218	0.632792	RHOBTB1	protein_coding
ENSG00000072501.19	9168.55	0.0192301	0.0588957	0.326511	0.744038	0.846162	SMC1A	protein_coding
ENSG00000072506.13	3063.85	-0.263671	0.0592892	-4.44721	8.69934e-06	7.22493e-05	HSD17B10	protein_coding
ENSG00000072518.21	5896.44	-0.119576	0.0508963	-2.34941	0.0188031	0.0544439	MARK2	protein_coding
ENSG00000072571.20	1491.42	-0.285696	0.093701	-3.04901	0.00229594	0.0093665	HMMR	protein_coding
ENSG00000072609.18	1377.14	0.220056	0.0904616	2.43259	0.0149912	0.045135	CHFR	protein_coding
ENSG00000072657.9	196.767	-0.227866	0.19282	-1.18175	0.237304	0.395036	TRHDE	protein_coding
ENSG00000072682.19	2587.42	-0.188776	0.0663798	-2.84388	0.00445679	0.016397	P4HA2	protein_coding
ENSG00000204889.10	23.0755	-2.01315	0.290943	-6.9194	4.53553e-12	1.18589e-10	KRT40	protein_coding
ENSG00000072736.19	1686.61	0.156828	0.0611193	2.56593	0.01029	0.0330861	NFATC3	protein_coding
ENSG00000072756.17	876.89	-0.0700956	0.0458319	-1.52941	0.126164	0.247262	TRNT1	protein_coding
ENSG00000072778.20	10235.8	-0.0629373	0.0559689	-1.1245	0.260799	0.422366	ACADVL	protein_coding
ENSG00000072786.13	2944.2	0.726549	0.0554922	13.0928	3.61955e-39	4.17122e-37	STK10	protein_coding
ENSG00000072803.17	2901.96	0.12185	0.0552051	2.20722	0.0272989	0.073939	FBXW11	protein_coding
ENSG00000072832.15	697.991	0.102847	0.120502	0.853492	0.393387	0.563086	CRMP1	protein_coding
ENSG00000072840.13	1232.31	0.755789	0.121957	6.19719	5.74796e-10	1.13775e-08	EVC	protein_coding
ENSG00000072849.11	2017.82	0.0166854	0.0422167	0.395233	0.692671	0.812389	DERL2	protein_coding
ENSG00000072858.11	716.995	0.552239	0.13261	4.16437	3.12212e-05	0.000225765	SIDT1	protein_coding
ENSG00000072864.16	2249.73	0.139948	0.0574056	2.43788	0.0147736	0.044608	NDE1	protein_coding
ENSG00000072952.19	3989.19	0.571091	0.147031	3.88416	0.000102683	0.000643015	IRAG1	protein_coding
ENSG00000072954.7	776.882	-0.279239	0.121518	-2.29791	0.0215668	0.0609534	TMEM38A	protein_coding
ENSG00000072958.9	2808.21	0.299905	0.0518476	5.78435	7.2794e-09	1.19362e-07	AP1M1	protein_coding
ENSG00000073008.15	4686.45	-0.261709	0.0835489	-3.13241	0.00173377	0.00736428	PVR	protein_coding
ENSG00000073050.12	1622.12	-0.0508182	0.0540378	-0.94042	0.347002	0.516213	XRCC1	protein_coding
ENSG00000073060.16	4037.34	-0.257078	0.092224	-2.78754	0.00531091	0.0190146	SCARB1	protein_coding
ENSG00000115844.11	23.4105	-2.009	0.211721	-9.48891	2.33463e-21	1.21569e-19	DLX2	protein_coding
ENSG00000073111.14	2653.6	0.0637093	0.0960177	0.663516	0.507	0.66725	MCM2	protein_coding
ENSG00000073146.16	52.559	0.0909989	0.136031	0.668959	0.503522	0.663865	MOV10L1	protein_coding
ENSG00000073150.14	147.64	0.197215	0.180726	1.09124	0.275169	0.438658	PANX2	protein_coding
ENSG00000073169.14	1315.71	-0.136502	0.0536968	-2.54209	0.011019	0.035041	SELENOO	protein_coding
ENSG00000073282.14	120.627	-0.0211558	0.184098	-0.114916	0.908512	0.95004	TP63	protein_coding
ENSG00000073331.18	1337.19	0.222794	0.0705064	3.15991	0.00157819	0.00679259	ALPK1	protein_coding
ENSG00000073350.14	13137.2	-0.393778	0.0773871	-5.08842	3.61054e-07	4.22615e-06	LLGL2	protein_coding
ENSG00000073417.15	3112.56	-0.108546	0.056596	-1.91791	0.0551228	0.12989	PDE8A	protein_coding
ENSG00000073464.13	1059.89	0.0201414	0.132343	0.15219	0.879037	0.932595	CLCN4	protein_coding
ENSG00000073536.18	1364.32	-0.290259	0.0628172	-4.62069	3.82472e-06	3.49892e-05	NLE1	protein_coding
ENSG00000073578.17	840.218	-0.314536	0.0773104	-4.06847	4.7322e-05	0.000326962	SDHA	protein_coding
ENSG00000073584.20	615.058	-0.428276	0.0877189	-4.88237	1.0482e-06	1.09628e-05	SMARCE1	protein_coding
ENSG00000073598.6	4.76342	-0.250237	0.134487	-1.86068	0.0627895	0.144131	FNDC8	protein_coding
ENSG00000073605.18	4790.23	-0.462332	0.13811	-3.34757	0.000815244	0.00384184	GSDMB	protein_coding
ENSG00000073614.13	4468.43	0.134399	0.0472458	2.84469	0.00444553	0.0163617	KDM5A	protein_coding
ENSG00000073670.14	49.3396	-0.0805023	0.130795	-0.615483	0.538236	0.692386	ADAM11	protein_coding
ENSG00000073711.11	949.453	0.0449035	0.115731	0.387999	0.698017	0.815809	PPP2R3A	protein_coding
ENSG00000073712.15	3919.39	0.392907	0.133377	2.94583	0.00322088	0.0124916	FERMT2	protein_coding
ENSG00000073734.10	39.1282	0.374734	0.180317	2.0782	0.037691	0.0960933	ABCB11	protein_coding
ENSG00000073737.17	500.861	-0.425718	0.206645	-2.06014	0.0393849	0.0995966	DHRS9	protein_coding
ENSG00000073754.6	5.07715	0.89957	0.289964	3.10235	0.00191989	0.00803349	CD5L	protein_coding
ENSG00000073756.12	2031.53	-0.00377003	0.171565	-0.0219744	0.982468	0.991211	PTGS2	protein_coding
ENSG00000073792.16	4334.99	-0.295585	0.107219	-2.75684	0.00583631	0.0205623	IGF2BP2	protein_coding
ENSG00000073803.14	3660.48	-0.209616	0.0626845	-3.34398	0.000825858	0.00388591	MAP3K13	protein_coding
ENSG00000073849.16	7848.1	0.465791	0.108515	4.29242	1.76739e-05	0.000135997	ST6GAL1	protein_coding
ENSG00000275896.6	3107.61	-1.99924	0.28741	-6.95606	3.49928e-12	9.26764e-11	PRSS2	protein_coding
ENSG00000073910.22	1618.24	0.227926	0.100036	2.27843	0.0227009	0.0635636	FRY	protein_coding
ENSG00000073921.18	12825.6	-0.0219108	0.0461079	-0.475207	0.63464	0.769229	PICALM	protein_coding
ENSG00000073969.18	3722.37	-0.250373	0.0584515	-4.28343	1.84036e-05	0.000141016	NSF	protein_coding
ENSG00000074047.22	910.047	0.427777	0.123577	3.46163	0.000536912	0.00269364	GLI2	protein_coding
ENSG00000074054.20	3853.06	0.121449	0.0434972	2.7921	0.00523668	0.0187942	CLASP1	protein_coding
ENSG00000074071.15	3025.45	-0.237622	0.0666203	-3.56681	0.000361356	0.00191757	MRPS34	protein_coding
ENSG00000074181.9	14818.7	0.273926	0.0921296	2.97326	0.00294651	0.0115854	NOTCH3	protein_coding
ENSG00000074201.9	4946.29	-0.200698	0.0581785	-3.4497	0.000561207	0.00279819	CLNS1A	protein_coding
ENSG00000074219.14	1241.44	0.133678	0.104513	1.27906	0.200875	0.350172	TEAD2	protein_coding
ENSG00000074266.22	1229.86	-0.0755464	0.0515618	-1.46516	0.142877	0.271801	EED	protein_coding
ENSG00000074276.10	3315.06	-0.813213	0.190771	-4.26277	2.01913e-05	0.000153093	CDHR2	protein_coding
ENSG00000074317.11	8.50588	-0.539853	0.201321	-2.68155	0.00732824	0.0248884	SNCB	protein_coding
ENSG00000074319.13	3869.3	-0.151459	0.039402	-3.84393	0.000121078	0.000741601	TSG101	protein_coding
ENSG00000074356.17	3057.9	0.0404564	0.0454509	0.890112	0.373406	0.543656	NCBP3	protein_coding
ENSG00000074370.18	11032.7	0.215634	0.124519	1.73174	0.0833202	0.180031	ATP2A3	protein_coding
ENSG00000074410.14	3420.52	-0.200881	0.169882	-1.18248	0.237017	0.394683	CA12	protein_coding
ENSG00000074416.14	8657.33	-0.146989	0.102442	-1.43485	0.151329	0.284018	MGLL	protein_coding
ENSG00000074527.13	1927.03	0.163063	0.106	1.53833	0.123967	0.244007	NTN4	protein_coding
ENSG00000074582.15	1138.48	-0.34268	0.0516	-6.64108	3.1139e-11	7.38452e-10	BCS1L	protein_coding
ENSG00000074590.13	1215.5	0.239392	0.0856294	2.79567	0.0051792	0.0186205	NUAK1	protein_coding
ENSG00000074603.19	3308.62	-0.013017	0.0405526	-0.320989	0.748219	0.848989	DPP8	protein_coding
ENSG00000074621.14	889.071	0.0897015	0.0610594	1.46909	0.14181	0.270252	SLC24A1	protein_coding
ENSG00000074657.14	3355.38	0.259501	0.0826914	3.13819	0.00169993	0.00723868	ZNF532	protein_coding
ENSG00000074660.16	646.649	0.596546	0.0682207	8.74436	2.24287e-18	9.85419e-17	SCARF1	protein_coding
ENSG00000074695.6	9303.44	-0.000294974	0.0708879	-0.00416114	0.99668	0.998364	LMAN1	protein_coding
ENSG00000074696.13	9225.3	-0.215661	0.064897	-3.32312	0.000890154	0.0041499	HACD3	protein_coding
ENSG00000074755.15	5478.11	0.178915	0.0609427	2.93579	0.00332699	0.0128494	ZZEF1	protein_coding
ENSG00000074771.4	3.0315	0.165033	0.346401	0.476422	0.633774	0.768624	NOX3	protein_coding
ENSG00000074800.16	48858.7	-0.197928	0.0767749	-2.57803	0.00993645	0.0321405	ENO1	protein_coding
ENSG00000074803.20	9.24211	0.357874	0.215614	1.65979	0.0969567	0.202206	SLC12A1	protein_coding
ENSG00000074842.8	6323.35	-0.141301	0.0666537	-2.11993	0.034012	0.0884739	MYDGF	protein_coding
ENSG00000074855.11	986.907	-0.10892	0.0671534	-1.62196	0.104812	0.21447	ANO8	protein_coding
ENSG00000074935.14	861.274	-0.045473	0.0636116	-0.714854	0.474699	0.639499	TUBE1	protein_coding
ENSG00000074964.17	4432.08	-0.270399	0.0872902	-3.0977	0.00195028	0.00814265	ARHGEF10L	protein_coding
ENSG00000074966.11	95.7025	0.769397	0.107315	7.1695	7.52738e-13	2.13861e-11	TXK	protein_coding
ENSG00000181433.9	69.6035	-1.99034	0.384206	-5.18039	2.21423e-07	2.70837e-06	SAGE1	protein_coding
ENSG00000075043.19	79.3484	-0.0749863	0.227758	-0.329237	0.741977	0.845012	KCNQ2	protein_coding
ENSG00000075073.15	1214.56	0.574508	0.248348	2.31332	0.0207051	0.0589342	TACR2	protein_coding
ENSG00000075089.9	961.627	-0.139518	0.0551397	-2.53026	0.0113977	0.036068	ACTR6	protein_coding
ENSG00000075131.10	490.898	-0.224931	0.0629884	-3.57099	0.000355631	0.00189126	TIPIN	protein_coding
ENSG00000075142.14	5343.36	-0.467285	0.0752928	-6.20624	5.42668e-10	1.07806e-08	SRI	protein_coding
ENSG00000075151.21	5737.92	-0.031399	0.0524568	-0.598569	0.549461	0.70179	EIF4G3	protein_coding
ENSG00000075188.9	1139.65	-0.193028	0.0611582	-3.15621	0.00159833	0.00686724	NUP37	protein_coding
ENSG00000075213.11	1020.81	0.00657735	0.145385	0.0452409	0.963915	0.980673	SEMA3A	protein_coding
ENSG00000075218.19	1343.5	-0.165739	0.0919475	-1.80255	0.0714597	0.159618	GTSE1	protein_coding
ENSG00000075223.14	4943.07	-0.0713305	0.125039	-0.570463	0.568363	0.717405	SEMA3C	protein_coding
ENSG00000075234.17	3212.19	-0.205381	0.074937	-2.74072	0.0061305	0.0214482	TTC38	protein_coding
ENSG00000075239.14	1871.3	-0.111923	0.0703378	-1.59122	0.111559	0.224827	ACAT1	protein_coding
ENSG00000075240.17	3013.16	-0.222236	0.0709192	-3.13365	0.00172646	0.0073364	GRAMD4	protein_coding
ENSG00000075275.18	3833.77	-0.243743	0.118576	-2.05558	0.0398228	0.100498	CELSR1	protein_coding
ENSG00000075290.8	21.2489	-0.253027	0.157653	-1.60496	0.108502	0.220171	WNT8B	protein_coding
ENSG00000075292.19	4675.25	-0.0894821	0.0430622	-2.07797	0.037712	0.0961419	ZNF638	protein_coding
ENSG00000075303.13	1827.69	-0.290953	0.0647145	-4.49595	6.92612e-06	5.92422e-05	SLC25A40	protein_coding
ENSG00000075336.12	980.252	-0.10498	0.063273	-1.65916	0.0970835	0.202402	TIMM21	protein_coding
ENSG00000075340.23	168.254	0.755167	0.169315	4.46012	8.19151e-06	6.86691e-05	ADD2	protein_coding
ENSG00000075388.4	4.57058	0.372546	0.220146	1.69227	0.0905944	0.192096	FGF4	protein_coding
ENSG00000075391.17	3531.68	-0.0451784	0.0620926	-0.727597	0.46686	0.632506	RASAL2	protein_coding
ENSG00000075399.14	666.745	-0.130953	0.0696985	-1.87885	0.060265	0.139475	VPS9D1	protein_coding
ENSG00000075407.18	1695.12	-0.0659635	0.0578055	-1.14113	0.253816	0.414365	ZNF37A	protein_coding
ENSG00000075413.19	3962.8	-0.101629	0.0391245	-2.59759	0.00938801	0.0306791	MARK3	protein_coding
ENSG00000075415.13	23127.5	-0.127947	0.0509856	-2.50947	0.0120913	0.0378251	SLC25A3	protein_coding
ENSG00000075420.13	8879.94	0.16561	0.0630427	2.62694	0.00861557	0.0285472	FNDC3B	protein_coding
ENSG00000075426.12	16292.9	0.0795844	0.0704343	1.12991	0.258515	0.419786	FOSL2	protein_coding
ENSG00000075429.9	11.2434	0.162084	0.19646	0.825024	0.409358	0.578455	CACNG5	protein_coding
ENSG00000075461.6	345.438	-0.591403	0.245157	-2.41234	0.0158504	0.0472536	CACNG4	protein_coding
ENSG00000075539.15	4913.34	0.155527	0.0629415	2.47098	0.0134743	0.0413796	FRYL	protein_coding
ENSG00000075568.17	7413.29	0.0519108	0.0468064	1.10905	0.267408	0.430048	TMEM131	protein_coding
ENSG00000075618.18	6838.4	-0.237508	0.126763	-1.87365	0.060979	0.140812	FSCN1	protein_coding
ENSG00000075624.17	442036	-0.00530741	0.0576421	-0.0920751	0.926638	0.960019	ACTB	protein_coding
ENSG00000075643.6	1446.45	-0.254276	0.0971663	-2.61692	0.0088727	0.0292436	MOCOS	protein_coding
ENSG00000075651.16	2166.31	-0.0563606	0.0941396	-0.598692	0.549378	0.701739	PLD1	protein_coding
ENSG00000075673.12	25.314	-0.957413	0.273993	-3.49429	0.000475316	0.00242653	ATP12A	protein_coding
ENSG00000075702.18	1223.94	-0.205131	0.0963139	-2.12982	0.0331865	0.0866796	WDR62	protein_coding
ENSG00000075711.21	5287.73	-0.115613	0.0529896	-2.18181	0.0291233	0.0780386	DLG1	protein_coding
ENSG00000075785.14	19938	-0.109267	0.0405812	-2.69256	0.0070906	0.0241949	RAB7A	protein_coding
ENSG00000075790.12	47.7274	-0.204461	0.0627093	-3.26046	0.00111231	0.00503583	BCAP29	protein_coding
ENSG00000075826.17	273.84	0.25933	0.105193	2.46527	0.013691	0.0419362	SEC31B	protein_coding
ENSG00000075856.12	2902.24	-0.0453491	0.0348196	-1.3024	0.192778	0.339847	SART3	protein_coding
ENSG00000075886.11	45.2512	-0.034009	0.0873981	-0.389127	0.697182	0.815259	TUBA3D	protein_coding
ENSG00000075891.22	20.8502	-0.177958	0.264251	-0.673441	0.500667	0.661479	PAX2	protein_coding
ENSG00000075914.13	897.02	-0.217527	0.0494115	-4.40234	1.07088e-05	8.68567e-05	EXOSC7	protein_coding
ENSG00000075945.13	1474.95	-0.167014	0.0677286	-2.46593	0.0136659	0.0418673	KIFAP3	protein_coding
ENSG00000075975.17	1640.35	0.00336788	0.0421959	0.0798153	0.936384	0.965433	MKRN2	protein_coding
ENSG00000076003.5	3578.53	0.0215497	0.0653081	0.32997	0.741422	0.844633	MCM6	protein_coding
ENSG00000076043.11	1653.16	-0.207738	0.0649619	-3.19785	0.00138456	0.00606963	REXO2	protein_coding
ENSG00000076053.12	1454.46	-0.0565002	0.0552479	-1.02267	0.306465	0.47368	RBM7	protein_coding
ENSG00000076067.13	4052.87	0.196352	0.06531	3.00646	0.0026431	0.0105405	RBMS2	protein_coding
ENSG00000076108.12	9213.92	0.121838	0.0453135	2.68877	0.00717159	0.0244238	BAZ2A	protein_coding
ENSG00000076201.15	6623.06	-0.0316765	0.047759	-0.663257	0.507166	0.667365	PTPN23	protein_coding
ENSG00000076242.16	1539.9	0.0316251	0.0820684	0.38535	0.699978	0.817092	MLH1	protein_coding
ENSG00000076248.11	2643.93	-0.165024	0.0653138	-2.52664	0.011516	0.0363651	UNG	protein_coding
ENSG00000076258.10	263.744	-0.188254	0.0852967	-2.20705	0.0273106	0.0739666	FMO4	protein_coding
ENSG00000076321.11	1148.09	-0.00590353	0.0378597	-0.155931	0.876087	0.930951	KLHL20	protein_coding
ENSG00000076344.16	130.961	-0.289946	0.158211	-1.83265	0.0668546	0.151449	RGS11	protein_coding
ENSG00000076351.13	388.027	-0.0815485	0.100963	-0.807709	0.419258	0.587992	SLC46A1	protein_coding
ENSG00000076356.7	5224.94	-0.309579	0.0895099	-3.4586	0.000542988	0.00272036	PLXNA2	protein_coding
ENSG00000076382.17	2042.2	-0.342292	0.0878857	-3.89474	9.83034e-05	0.000618664	SPAG5	protein_coding
ENSG00000076513.17	3366.38	0.337009	0.0482045	6.99123	2.72482e-12	7.33897e-11	ANKRD13A	protein_coding
ENSG00000076554.15	9961.15	-0.508449	0.0899132	-5.65489	1.55947e-08	2.41315e-07	TPD52	protein_coding
ENSG00000076555.15	1925.46	0.280054	0.108153	2.58943	0.00961349	0.0312892	ACACB	protein_coding
ENSG00000076604.15	3924.64	-0.402507	0.0669839	-6.00901	1.86663e-09	3.39819e-08	TRAF4	protein_coding
ENSG00000076641.4	2896.63	0.433608	0.0843977	5.13768	2.78152e-07	3.32378e-06	PAG1	protein_coding
ENSG00000076650.7	854.092	-0.021729	0.0550542	-0.394684	0.693076	0.812601	GPATCH1	protein_coding
ENSG00000076685.19	2257.31	0.0889566	0.0615585	1.44508	0.148437	0.279793	NT5C2	protein_coding
ENSG00000076706.17	9374.25	0.359461	0.108655	3.30829	0.000938674	0.00433915	MCAM	protein_coding
ENSG00000076716.9	3053.74	0.133756	0.107689	1.24207	0.214212	0.366757	GPC4	protein_coding
ENSG00000076770.14	3907.72	-0.0278399	0.0959661	-0.290102	0.771738	0.864558	MBNL3	protein_coding
ENSG00000076826.10	4163.97	-0.483799	0.093249	-5.18825	2.12282e-07	2.60534e-06	CAMSAP3	protein_coding
ENSG00000076864.19	3000.66	-0.772767	0.152306	-5.07377	3.90015e-07	4.52212e-06	RAP1GAP	protein_coding
ENSG00000076924.12	3441.39	0.0487997	0.0434825	1.12228	0.261742	0.423594	XAB2	protein_coding
ENSG00000076928.18	6742.33	0.255495	0.0577262	4.42598	9.60048e-06	7.8763e-05	ARHGEF1	protein_coding
ENSG00000076944.16	2460.86	-0.183081	0.0678733	-2.69739	0.00698857	0.0239081	STXBP2	protein_coding
ENSG00000076984.18	2164.45	0.031457	0.0506629	0.620908	0.53466	0.690087	MAP2K7	protein_coding
ENSG00000077009.13	6.2521	-0.0435297	0.242155	-0.17976	0.857341	0.919811	NMRK2	protein_coding
ENSG00000077044.11	3529.61	-0.0989162	0.0732837	-1.34977	0.17709	0.31953	DGKD	protein_coding
ENSG00000077063.11	332.184	-0.0854317	0.158297	-0.539692	0.589409	0.734324	CTTNBP2	protein_coding
ENSG00000077080.10	10.9583	-0.0542868	0.203239	-0.267108	0.789386	0.875941	ACTL6B	protein_coding
ENSG00000077092.19	389.13	0.181229	0.0986779	1.83657	0.0662728	0.150381	RARB	protein_coding
ENSG00000077097.15	7592.42	0.0510212	0.0548674	0.929901	0.352422	0.521757	TOP2B	protein_coding
ENSG00000077147.16	22303.9	-0.194559	0.058615	-3.31927	0.000902535	0.00419663	TM9SF3	protein_coding
ENSG00000077150.20	5986.36	0.328875	0.0674809	4.8736	1.09581e-06	1.14098e-05	NFKB2	protein_coding
ENSG00000077152.11	1470.93	-0.442321	0.0856834	-5.16228	2.43964e-07	2.96054e-06	UBE2T	protein_coding
ENSG00000077157.22	15007.8	0.679385	0.175784	3.86487	0.000111147	0.000687703	PPP1R12B	protein_coding
ENSG00000077232.18	9549.35	-0.192617	0.0564222	-3.41384	0.000640533	0.00312909	DNAJC10	protein_coding
ENSG00000077235.18	6686.81	0.0537966	0.054088	0.994613	0.319925	0.487971	GTF3C1	protein_coding
ENSG00000077238.14	4985.65	0.216543	0.0618302	3.50223	0.00046139	0.00236624	IL4R	protein_coding
ENSG00000077254.14	3263.25	-0.00195651	0.0435735	-0.0449013	0.964186	0.980816	USP33	protein_coding
ENSG00000077264.15	197.314	0.347763	0.167291	2.07878	0.0376373	0.0959912	PAK3	protein_coding
ENSG00000077274.9	2086.6	0.306938	0.21955	1.39803	0.162104	0.298812	CAPN6	protein_coding
ENSG00000077279.19	64.6359	0.934927	0.233231	4.00858	6.10843e-05	0.000408791	DCX	protein_coding
ENSG00000077312.9	3737.82	-0.14157	0.0536947	-2.63658	0.00837456	0.027865	SNRPA	protein_coding
ENSG00000077327.16	10.383	0.246098	0.199524	1.23342	0.217418	0.370736	SPAG6	protein_coding
ENSG00000077348.9	1535.77	-0.228557	0.0774857	-2.94967	0.00318116	0.012359	EXOSC5	protein_coding
ENSG00000077380.16	6255.97	-0.191306	0.0458293	-4.17432	2.98872e-05	0.000217301	DYNC1I2	protein_coding
ENSG00000077420.16	1743	0.722029	0.126328	5.7155	1.09384e-08	1.73519e-07	APBB1IP	protein_coding
ENSG00000077454.16	981.629	-0.0763974	0.0700083	-1.09126	0.275157	0.438654	LRCH4	protein_coding
ENSG00000077458.13	1102.85	-0.104918	0.0519338	-2.02023	0.0433596	0.107483	FAM76B	protein_coding
ENSG00000077463.15	1364.77	-0.0443058	0.0640885	-0.691322	0.489363	0.651955	SIRT6	protein_coding
ENSG00000077498.9	1.44785	0.524409	0.33228	1.57821	0.114516	0.229564	TYR	protein_coding
ENSG00000077514.9	2635	-0.154481	0.0852923	-1.8112	0.0701101	0.157296	POLD3	protein_coding
ENSG00000141736.14	38420	-1.94635	0.165392	-11.7681	5.69996e-32	4.77826e-30	ERBB2	protein_coding
ENSG00000077549.19	18183.7	-0.0165894	0.0465585	-0.356312	0.721607	0.831675	CAPZB	protein_coding
ENSG00000077585.14	1614.48	0.246912	0.0750775	3.28876	0.0010063	0.00461708	GPR137B	protein_coding
ENSG00000077616.11	104.941	-0.152367	0.118879	-1.28169	0.19995	0.349129	NAALAD2	protein_coding
ENSG00000077684.16	2308.55	0.0733488	0.0730219	1.00448	0.315149	0.482916	JADE1	protein_coding
ENSG00000077713.19	2052.92	-0.146672	0.0629774	-2.32896	0.0198614	0.0569645	SLC25A43	protein_coding
ENSG00000077721.16	4043.34	-0.126765	0.047412	-2.67369	0.00750214	0.0253809	UBE2A	protein_coding
ENSG00000077782.21	3891.37	0.169944	0.132608	1.28155	0.200002	0.349182	FGFR1	protein_coding
ENSG00000077800.13	7.98651	0.168718	0.223439	0.755096	0.450191	0.617351	FKBP6	protein_coding
ENSG00000077935.17	87.5305	-0.33932	0.183894	-1.84519	0.0650096	0.148088	SMC1B	protein_coding
ENSG00000183128.7	41.0002	-1.94495	0.248555	-7.82502	5.07568e-15	1.76138e-13	CALHM3	protein_coding
ENSG00000077943.8	1285.72	0.808243	0.163596	4.94048	7.79312e-07	8.37666e-06	ITGA8	protein_coding
ENSG00000078018.20	631.809	-0.294741	0.141313	-2.08573	0.0370033	0.0947475	MAP2	protein_coding
ENSG00000078043.16	1463.96	-0.0822121	0.058124	-1.41443	0.157236	0.292174	PIAS2	protein_coding
ENSG00000078053.17	172.521	0.494137	0.126774	3.89778	9.70805e-05	0.000611826	AMPH	protein_coding
ENSG00000078061.13	5193.5	0.0250487	0.0550606	0.45493	0.649159	0.780489	ARAF	protein_coding
ENSG00000078070.13	1514.96	-0.174793	0.0638137	-2.73911	0.00616065	0.0215369	MCCC1	protein_coding
ENSG00000151655.19	162.145	-1.93935	0.226405	-8.56587	1.07265e-17	4.48074e-16	ITIH2	protein_coding
ENSG00000078098.14	910.994	0.56617	0.136535	4.14671	3.37281e-05	0.000242114	FAP	protein_coding
ENSG00000078114.19	2168.99	-0.947341	0.17949	-5.27796	1.30627e-07	1.6805e-06	NEBL	protein_coding
ENSG00000078124.12	3195.44	-0.0545817	0.0590922	-0.92367	0.355658	0.525185	ACER3	protein_coding
ENSG00000078140.14	5871.89	-0.204368	0.040678	-5.02404	5.05946e-07	5.7339e-06	UBE2K	protein_coding
ENSG00000078142.13	1802.06	0.10594	0.0536359	1.97516	0.0482499	0.117017	PIK3C3	protein_coding
ENSG00000078177.14	1118.34	0.12773	0.0684383	1.86635	0.0619926	0.142734	N4BP2	protein_coding
ENSG00000078237.7	637.838	0.272555	0.0754332	3.61319	0.000302449	0.00164198	TIGAR	protein_coding
ENSG00000078246.17	1977.06	0.0108254	0.0565675	0.191371	0.848235	0.914227	TULP3	protein_coding
ENSG00000078269.15	3515.91	-0.263266	0.0574092	-4.58579	4.52275e-06	4.05723e-05	SYNJ2	protein_coding
ENSG00000078295.17	259.458	0.492643	0.177805	2.77068	0.00559388	0.0198674	ADCY2	protein_coding
ENSG00000078304.19	7070.07	0.0175926	0.0437413	0.402195	0.68754	0.808693	PPP2R5C	protein_coding
ENSG00000078328.22	27.8743	-0.206473	0.209039	-0.987725	0.323287	0.491635	RBFOX1	protein_coding
ENSG00000078369.18	23750.6	-0.0619559	0.0400914	-1.54537	0.122257	0.241327	GNB1	protein_coding
ENSG00000078399.19	224.339	-0.805911	0.217533	-3.70478	0.000211576	0.00120389	HOXA9	protein_coding
ENSG00000078401.7	1225.33	0.135563	0.122096	1.1103	0.266869	0.429513	EDN1	protein_coding
ENSG00000078403.17	2171.49	-0.00260396	0.0531196	-0.0490206	0.960903	0.979393	MLLT10	protein_coding
ENSG00000078487.17	166.816	0.0688541	0.0875361	0.78658	0.431528	0.599628	ZCWPW1	protein_coding
ENSG00000189001.11	74.8281	-1.93501	0.322591	-5.99835	1.99333e-09	3.61414e-08	SBSN	protein_coding
ENSG00000141738.14	8335.81	-1.93075	0.172087	-11.2196	3.26574e-29	2.46096e-27	GRB7	protein_coding
ENSG00000078596.11	1176.79	0.986574	0.122228	8.07162	6.93691e-16	2.57042e-14	ITM2A	protein_coding
ENSG00000078618.22	6200.41	-0.0284559	0.034895	-0.815471	0.414803	0.583977	NRDC	protein_coding
ENSG00000078668.14	5226.93	-0.185709	0.0702014	-2.64537	0.00816005	0.0272526	VDAC3	protein_coding
ENSG00000078674.18	7270.07	0.0508859	0.0702915	0.723927	0.469111	0.634542	PCM1	protein_coding
ENSG00000078687.17	1867.09	0.286483	0.0817688	3.50357	0.000459061	0.00235626	TNRC6C	protein_coding
ENSG00000078699.22	3348.49	-0.286136	0.067178	-4.25937	2.05002e-05	0.000155172	CBFA2T2	protein_coding
ENSG00000078725.13	27.5584	0.365034	0.210489	1.73422	0.0828796	0.179268	BRINP1	protein_coding
ENSG00000078747.16	4846.66	-0.0852631	0.0463206	-1.84072	0.0656631	0.149293	ITCH	protein_coding
ENSG00000078795.17	21.2919	0.172363	0.121145	1.42278	0.1548	0.288993	PKD2L2	protein_coding
ENSG00000078804.13	5479.56	-0.265724	0.0920063	-2.8881	0.00387572	0.0145928	TP53INP2	protein_coding
ENSG00000078808.19	10297.3	-0.137604	0.054793	-2.51134	0.0120274	0.0376517	SDF4	protein_coding
ENSG00000078814.17	250.637	-0.765253	0.125968	-6.07498	1.24005e-09	2.33079e-08	MYH7B	protein_coding
ENSG00000078900.15	361.359	-0.0412881	0.143702	-0.287317	0.77387	0.866156	TP73	protein_coding
ENSG00000078902.16	4120.04	-0.0904924	0.0502373	-1.8013	0.0716556	0.15994	TOLLIP	protein_coding
ENSG00000078967.13	912.709	-0.203181	0.0531485	-3.82289	0.000131898	0.000799018	UBE2D4	protein_coding
ENSG00000079101.16	17.4079	-0.406365	0.165853	-2.45014	0.0142799	0.0434051	CLUL1	protein_coding
ENSG00000079102.16	650.751	0.566462	0.149258	3.79519	0.000147528	0.000881444	RUNX1T1	protein_coding
ENSG00000079112.10	13725.5	-0.613512	0.209993	-2.92158	0.00348257	0.0133506	CDH17	protein_coding
ENSG00000079134.12	1278.39	-0.145748	0.0547656	-2.66131	0.00778377	0.0261789	THOC1	protein_coding
ENSG00000079150.18	737.504	0.0205972	0.0805373	0.255747	0.798146	0.881954	FKBP7	protein_coding
ENSG00000079156.17	215.545	-0.0830931	0.134771	-0.616551	0.537531	0.691995	OSBPL6	protein_coding
ENSG00000079215.14	756.286	0.871987	0.127474	6.8405	7.89171e-12	2.00586e-10	SLC1A3	protein_coding
ENSG00000079246.16	17182.1	-0.172323	0.0382715	-4.50264	6.7114e-06	5.76461e-05	XRCC5	protein_coding
ENSG00000079257.8	1065.1	0.395282	0.0994128	3.97617	7.00335e-05	0.000460723	LXN	protein_coding
ENSG00000205116.3	9.79671	-1.90772	0.24111	-7.91222	2.52837e-15	8.96367e-14	TMEM88B	protein_coding
ENSG00000079277.22	1611.35	0.0983304	0.0346057	2.84145	0.00449091	0.0165052	MKNK1	protein_coding
ENSG00000079308.19	25088	0.624846	0.160974	3.88166	0.000103746	0.000648354	TNS1	protein_coding
ENSG00000079313.15	2689.79	0.0351359	0.0554922	0.633168	0.526624	0.683353	REXO1	protein_coding
ENSG00000079332.15	4712.07	-0.0423174	0.0418716	-1.01065	0.312185	0.480123	SAR1A	protein_coding
ENSG00000079335.20	530.288	0.159072	0.0606665	2.62208	0.00873954	0.0288744	CDC14A	protein_coding
ENSG00000079337.16	631.177	0.119353	0.093578	1.27544	0.202154	0.351866	RAPGEF3	protein_coding
ENSG00000079385.23	5522.3	-0.0968012	0.129846	-0.745505	0.455966	0.622788	CEACAM1	protein_coding
ENSG00000079387.14	1744.78	0.0195475	0.0471491	0.41459	0.678442	0.80203	SENP1	protein_coding
ENSG00000079393.20	6.26223	-0.647557	0.271026	-2.38928	0.0168813	0.0498229	DUSP13	protein_coding
ENSG00000079432.7	8018.55	0.173373	0.0574077	3.02002	0.00252755	0.0101457	CIC	protein_coding
ENSG00000079435.10	587.752	0.0911184	0.108437	0.840292	0.400745	0.570182	LIPE	protein_coding
ENSG00000079459.13	10231.1	-0.447038	0.0994523	-4.495	6.95709e-06	5.94554e-05	FDFT1	protein_coding
ENSG00000079462.8	1603.78	-0.29407	0.0857774	-3.4283	0.000607385	0.00299361	PAFAH1B3	protein_coding
ENSG00000079482.13	652.302	-0.122197	0.0760785	-1.6062	0.10823	0.219757	OPHN1	protein_coding
ENSG00000079557.5	4.25416	-0.11971	0.392532	-0.304968	0.76039	0.856916	AFM	protein_coding
ENSG00000079616.13	2764.8	-0.141648	0.0702697	-2.01577	0.0438238	0.108388	KIF22	protein_coding
ENSG00000079689.14	106.017	0.830176	0.285401	2.9088	0.00362814	0.0138066	SCGN	protein_coding
ENSG00000079691.18	3844.73	-0.0873704	0.06752	-1.29399	0.195668	0.343636	CARMIL1	protein_coding
ENSG00000079739.17	3164.67	-0.193878	0.0720626	-2.69042	0.0071363	0.0243221	PGM1	protein_coding
ENSG00000079785.16	5862.28	-0.147415	0.0395755	-3.72491	0.000195383	0.00112594	DDX1	protein_coding
ENSG00000079805.18	16976.5	-0.121188	0.0615334	-1.96947	0.0488996	0.118331	DNM2	protein_coding
ENSG00000079819.19	5506.32	0.252738	0.088039	2.87075	0.00409504	0.0152681	EPB41L2	protein_coding
ENSG00000079841.18	123.753	0.362663	0.22469	1.61406	0.106514	0.217168	RIMS1	protein_coding
ENSG00000079931.15	1082.39	0.759688	0.132099	5.75091	8.87655e-09	1.43025e-07	MOXD1	protein_coding
ENSG00000079950.14	4438.8	0.0685564	0.0484884	1.41387	0.1574	0.292387	STX7	protein_coding
ENSG00000079974.18	754.67	-0.00826921	0.0500593	-0.165188	0.868796	0.926444	RABL2B	protein_coding
ENSG00000079999.14	4012.02	0.0736477	0.0561782	1.31097	0.189869	0.336046	KEAP1	protein_coding
ENSG00000080007.8	103.695	-0.246499	0.17097	-1.44177	0.149368	0.281251	DDX43	protein_coding
ENSG00000080031.10	3384.68	-0.42939	0.117611	-3.65093	0.000261295	0.00144584	PTPRH	protein_coding
ENSG00000080166.16	11.9434	0.239604	0.186188	1.28689	0.198131	0.34674	DCT	protein_coding
ENSG00000080189.15	3708.41	-0.208598	0.0581091	-3.58977	0.000330969	0.00177546	SLC35C2	protein_coding
ENSG00000080200.10	1383.07	0.289633	0.0954253	3.03518	0.00240392	0.00972878	CRYBG3	protein_coding
ENSG00000080224.17	28.8744	0.161993	0.240746	0.672882	0.501022	0.66179	EPHA6	protein_coding
ENSG00000080293.10	193.847	0.451452	0.229574	1.96648	0.0492434	0.118999	SCTR	protein_coding
ENSG00000080298.15	786.745	0.236843	0.0856867	2.76406	0.00570876	0.0201986	RFX3	protein_coding
ENSG00000080345.18	4907.58	0.0313752	0.0514217	0.610154	0.54176	0.695474	RIF1	protein_coding
ENSG00000080371.6	4821.19	-0.106039	0.0446138	-2.37682	0.0174626	0.0512312	RAB21	protein_coding
ENSG00000080493.18	2930.3	-0.05689	0.173323	-0.328232	0.742736	0.845484	SLC4A4	protein_coding
ENSG00000080503.24	5040.11	0.316614	0.0753671	4.20096	2.65791e-05	0.000195823	SMARCA2	protein_coding
ENSG00000080511.5	39.5172	-0.799804	0.253404	-3.15624	0.00159817	0.00686715	RDH8	protein_coding
ENSG00000080546.13	2115.17	-0.0345045	0.104609	-0.329844	0.741518	0.844683	SESN1	protein_coding
ENSG00000080561.14	1041.91	0.233873	0.115278	2.02878	0.0424809	0.105805	MID2	protein_coding
ENSG00000080572.13	1.20134	-0.419019	0.29786	-1.40677	0.159497	0.29528	DNAAF6	protein_coding
ENSG00000080573.7	1960.4	0.21582	0.107825	2.00159	0.0453289	0.111377	COL5A3	protein_coding
ENSG00000080603.17	490.655	0.10686	0.0607822	1.75808	0.0787339	0.172407	SRCAP	protein_coding
ENSG00000080608.10	1940.68	-0.167687	0.0767852	-2.18385	0.0289735	0.0777019	PUM3	protein_coding
ENSG00000080618.17	16.4009	-0.775583	0.190221	-4.07728	4.55654e-05	0.000316544	CPB2	protein_coding
ENSG00000080644.16	323.11	0.779079	0.225665	3.45237	0.000555687	0.00277606	CHRNA3	protein_coding
ENSG00000080709.16	68.4192	-0.0851162	0.130501	-0.652229	0.514254	0.673446	KCNN2	protein_coding
ENSG00000080802.19	1775.05	0.00967137	0.0325677	0.296962	0.766495	0.861128	CNOT4	protein_coding
ENSG00000080815.19	5751.38	-0.0258445	0.0419842	-0.615576	0.538174	0.692386	PSEN1	protein_coding
ENSG00000080819.9	1426.5	-0.165955	0.0599848	-2.76661	0.0056642	0.0200728	CPOX	protein_coding
ENSG00000080822.17	2909.49	-0.0121551	0.0480216	-0.253116	0.800178	0.88303	CLDND1	protein_coding
ENSG00000080823.23	856.186	-0.508825	0.0833133	-6.10737	1.01286e-09	1.93707e-08	MOK	protein_coding
ENSG00000080824.19	74954.7	-0.387155	0.0640894	-6.04087	1.53289e-09	2.83147e-08	HSP90AA1	protein_coding
ENSG00000080839.12	1392.22	-0.165735	0.0697156	-2.3773	0.0174398	0.0511794	RBL1	protein_coding
ENSG00000080845.18	6092.71	-0.0718268	0.055807	-1.28706	0.198074	0.346675	DLGAP4	protein_coding
ENSG00000080854.16	1148.43	-0.0791353	0.160053	-0.494431	0.621002	0.759174	IGSF9B	protein_coding
ENSG00000080910.13	1.89773	-0.802211	0.409102	-1.96091	0.0498899	0.120195	CFHR2	protein_coding
ENSG00000080986.13	1082.36	-0.194951	0.0879896	-2.21561	0.0267181	0.072675	NDC80	protein_coding
ENSG00000081014.11	916.645	0.0722839	0.0517775	1.39605	0.1627	0.299653	AP4E1	protein_coding
ENSG00000081019.13	1812.95	0.0643547	0.0457019	1.40814	0.159089	0.294713	RSBN1	protein_coding
ENSG00000081026.19	1937.66	-0.122332	0.0599373	-2.041	0.0412505	0.103311	MAGI3	protein_coding
ENSG00000081041.9	1995.2	-0.39255	0.154774	-2.53627	0.0112039	0.0355302	CXCL2	protein_coding
ENSG00000081051.8	53.6755	-0.325484	0.322375	-1.00965	0.312665	0.480605	AFP	protein_coding
ENSG00000081052.13	713.459	0.845753	0.169474	4.99046	6.02352e-07	6.67579e-06	COL4A4	protein_coding
ENSG00000081059.20	2787.27	0.0570499	0.109677	0.520165	0.602948	0.745328	TCF7	protein_coding
ENSG00000081087.15	2211.16	0.256225	0.0632082	4.05366	5.04217e-05	0.000345721	OSTM1	protein_coding
ENSG00000081138.14	11.9448	-0.449572	0.255832	-1.75729	0.0788681	0.172632	CDH7	protein_coding
ENSG00000081148.12	28.7992	0.451932	0.117881	3.83381	0.000126176	0.00076928	IMPG2	protein_coding
ENSG00000081154.12	5974.93	-0.0397478	0.0361013	-1.10101	0.270894	0.434001	PCNP	protein_coding
ENSG00000081177.18	1721.24	-0.0776499	0.0441374	-1.75928	0.0785306	0.172077	EXD2	protein_coding
ENSG00000081181.8	184.94	-0.234275	0.105078	-2.22953	0.0257787	0.0705476	ARG2	protein_coding
ENSG00000081189.16	1955.69	0.983611	0.0982882	10.0074	1.41393e-23	8.26327e-22	MEF2C	protein_coding
ENSG00000131050.11	41.066	-1.90682	0.287315	-6.63669	3.20815e-11	7.59706e-10	BPIFA2	protein_coding
ENSG00000081248.11	9.47639	-0.343239	0.213449	-1.60806	0.107822	0.219163	CACNA1S	protein_coding
ENSG00000203783.5	5.26699	-1.90095	0.491497	-3.86768	0.000109874	0.000680969	PRR9	protein_coding
ENSG00000081307.14	2058.27	-0.0831918	0.0438889	-1.89551	0.0580252	0.135419	UBA5	protein_coding
ENSG00000081320.11	3249.63	0.694979	0.0706266	9.84019	7.5568e-23	4.24977e-21	STK17B	protein_coding
ENSG00000081377.17	1878.71	-0.0644801	0.0624244	-1.03293	0.301636	0.467994	CDC14B	protein_coding
ENSG00000081386.12	833.993	0.0838819	0.0523627	1.60194	0.109169	0.221225	ZNF510	protein_coding
ENSG00000081479.15	76.6123	0.155951	0.242007	0.64441	0.51931	0.67771	LRP2	protein_coding
ENSG00000081665.14	1689.51	0.124804	0.0688076	1.81381	0.0697077	0.156572	ZNF506	protein_coding
ENSG00000081692.12	288.846	-0.253509	0.0648325	-3.91022	9.22113e-05	0.000585262	JMJD4	protein_coding
ENSG00000081721.12	879.991	-0.293591	0.0457027	-6.42393	1.32797e-10	2.87238e-09	DUSP12	protein_coding
ENSG00000081760.17	2495.26	-0.206062	0.0702276	-2.9342	0.00334411	0.0128996	AACS	protein_coding
ENSG00000081791.9	2891.69	0.0759812	0.0430834	1.76358	0.0778021	0.170861	DELE1	protein_coding
ENSG00000081800.9	5.78341	0.539074	0.344553	1.56456	0.117686	0.234391	SLC13A1	protein_coding
ENSG00000081803.16	2279.69	-0.0468751	0.0777361	-0.603003	0.546507	0.699438	CADPS2	protein_coding
ENSG00000081818.4	227.167	0.0468681	0.127276	0.368239	0.712695	0.82598	PCDHB4	protein_coding
ENSG00000081842.18	10.2834	0.123432	0.184798	0.667929	0.504179	0.664482	PCDHA6	protein_coding
ENSG00000081853.15	98.0911	0.215187	0.120327	1.78835	0.0737192	0.163714	PCDHGA2	protein_coding
ENSG00000081870.12	972.775	-0.178242	0.0574122	-3.1046	0.00190539	0.007983	HSPB11	protein_coding
ENSG00000081913.14	2224.08	-0.180616	0.074768	-2.41569	0.0157055	0.046884	PHLPP1	protein_coding
ENSG00000081923.15	8531.53	-0.248674	0.0925807	-2.68602	0.00723079	0.0245999	ATP8B1	protein_coding
ENSG00000081985.13	212.295	0.799129	0.116173	6.87877	6.03704e-12	1.55128e-10	IL12RB2	protein_coding
ENSG00000082014.17	604.844	0.220906	0.107848	2.04831	0.0405295	0.101873	SMARCD3	protein_coding
ENSG00000082068.9	1352.62	-0.113754	0.0513977	-2.21321	0.0268834	0.0730671	WDR70	protein_coding
ENSG00000168928.13	13.2028	-1.89845	0.289399	-6.55995	5.38259e-11	1.22794e-09	CTRB2	protein_coding
ENSG00000082126.18	14.3044	-0.0418063	0.16098	-0.259698	0.795097	0.880007	MPP4	protein_coding
ENSG00000082146.13	962.249	-0.045958	0.0695262	-0.661017	0.508602	0.668588	STRADB	protein_coding
ENSG00000082153.18	6543.19	-0.171901	0.0480012	-3.58118	0.00034204	0.00182788	BZW1	protein_coding
ENSG00000082175.15	227.751	0.612613	0.163575	3.74514	0.000180293	0.00104893	PGR	protein_coding
ENSG00000082196.21	338.685	-0.125237	0.140174	-0.893442	0.371621	0.541925	C1QTNF3	protein_coding
ENSG00000082212.13	4297.15	0.125755	0.0663426	1.89554	0.0580215	0.135418	ME2	protein_coding
ENSG00000082213.18	2077.37	-0.251314	0.0581443	-4.32225	1.54449e-05	0.000120713	C5orf22	protein_coding
ENSG00000082258.13	2402.71	-0.0731898	0.0522064	-1.40193	0.160936	0.297261	CCNT2	protein_coding
ENSG00000082269.17	3251.87	-0.0780836	0.0830654	-0.940026	0.347204	0.516482	FAM135A	protein_coding
ENSG00000136695.15	17.647	-1.89292	0.329077	-5.75222	8.80812e-09	1.41969e-07	IL36RN	protein_coding
ENSG00000082397.17	1233.91	0.947871	0.107968	8.77917	1.64688e-18	7.3107e-17	EPB41L3	protein_coding
ENSG00000082438.17	3384.4	-0.0851503	0.0812185	-1.04841	0.294449	0.460196	COBLL1	protein_coding
ENSG00000082458.12	3165.02	-0.116362	0.0706929	-1.64602	0.0997587	0.206414	DLG3	protein_coding
ENSG00000082482.14	101.772	0.778373	0.225903	3.44561	0.000569766	0.00283403	KCNK2	protein_coding
ENSG00000082497.12	767.973	-0.399145	0.149085	-2.6773	0.00742178	0.0251505	SERTAD4	protein_coding
ENSG00000082512.15	1964.59	-0.0602697	0.08353	-0.721533	0.470582	0.635753	TRAF5	protein_coding
ENSG00000082515.18	1573.12	-0.202298	0.0576222	-3.51076	0.000446824	0.00230065	MRPL22	protein_coding
ENSG00000082516.9	1814.28	-0.0773188	0.0525209	-1.47215	0.14098	0.269118	GEMIN5	protein_coding
ENSG00000082556.14	15.6641	-0.98414	0.258121	-3.8127	0.000137455	0.000828133	OPRK1	protein_coding
ENSG00000082641.16	12322.3	0.116623	0.0524719	2.22259	0.0262438	0.0715816	NFE2L1	protein_coding
ENSG00000082684.16	218.46	0.304548	0.111275	2.7369	0.0062022	0.0216544	SEMA5B	protein_coding
ENSG00000082701.17	5365.69	-0.0959534	0.0406209	-2.36217	0.0181685	0.0529631	GSK3B	protein_coding
ENSG00000082781.12	7721.07	-0.00961113	0.0694862	-0.138317	0.88999	0.938981	ITGB5	protein_coding
ENSG00000082805.20	4334.42	0.262675	0.0753546	3.48586	0.000490564	0.00249351	ERC1	protein_coding
ENSG00000082898.18	11208.4	-0.173595	0.0454517	-3.81934	0.000133809	0.0008095	XPO1	protein_coding
ENSG00000082996.20	3283.13	-0.0178221	0.0496284	-0.359111	0.719512	0.830316	RNF13	protein_coding
ENSG00000083067.23	33.3099	0.386999	0.172888	2.23844	0.0251923	0.0691822	TRPM3	protein_coding
ENSG00000083093.10	1146.75	-0.042066	0.0516705	-0.81412	0.415576	0.584627	PALB2	protein_coding
ENSG00000083097.14	1431.93	0.0872374	0.07107	1.22749	0.21964	0.373504	DOP1A	protein_coding
ENSG00000083099.11	1667.26	-0.204522	0.047928	-4.26727	1.97878e-05	0.000150597	LYRM2	protein_coding
ENSG00000083123.15	1392.61	-0.262873	0.0689852	-3.81058	0.000138644	0.000834134	BCKDHB	protein_coding
ENSG00000083168.11	6288.76	0.0570251	0.0516271	1.10456	0.269352	0.432242	KAT6A	protein_coding
ENSG00000083223.18	2579.99	0.0750882	0.0569452	1.3186	0.187302	0.332663	TUT7	protein_coding
ENSG00000083290.20	946.972	0.164496	0.0890309	1.84763	0.0646561	0.147467	ULK2	protein_coding
ENSG00000083307.12	2562.53	-0.374908	0.087453	-4.28697	1.81127e-05	0.000139047	GRHL2	protein_coding
ENSG00000083312.17	7855.55	0.0727347	0.0462912	1.57124	0.116126	0.231904	TNPO1	protein_coding
ENSG00000083444.17	9287.16	-0.137439	0.06345	-2.16611	0.030303	0.0805462	PLOD1	protein_coding
ENSG00000188293.6	19.9319	-1.88405	0.311123	-6.05565	1.39848e-09	2.60668e-08	IGFL1	protein_coding
ENSG00000083457.12	1108.64	0.628902	0.0656736	9.57618	1.00704e-21	5.35724e-20	ITGAE	protein_coding
ENSG00000083520.15	4016.62	-0.166969	0.0538342	-3.10154	0.00192514	0.00805096	DIS3	protein_coding
ENSG00000083535.16	1149.55	-0.283198	0.053652	-5.27842	1.303e-07	1.6776e-06	PIBF1	protein_coding
ENSG00000083544.16	1186.82	-0.20168	0.0524398	-3.84594	0.000120092	0.00073666	TDRD3	protein_coding
ENSG00000083635.8	653.657	-0.372505	0.0625613	-5.95423	2.61294e-09	4.64346e-08	NUFIP1	protein_coding
ENSG00000083642.19	3604.06	-0.0700407	0.0601326	-1.16477	0.244112	0.403015	PDS5B	protein_coding
ENSG00000083720.13	1977.47	-0.109356	0.127606	-0.856987	0.391452	0.561313	OXCT1	protein_coding
ENSG00000083750.13	532.671	0.0451732	0.063446	0.711994	0.476468	0.64083	RRAGB	protein_coding
ENSG00000083782.8	64.8115	0.30129	0.27874	1.0809	0.279741	0.443862	EPYC	protein_coding
ENSG00000083799.18	2402.03	0.684877	0.0553618	12.3709	3.75444e-35	3.57347e-33	CYLD	protein_coding
ENSG00000083807.10	341.373	-0.252541	0.101043	-2.49935	0.0124423	0.0387114	SLC27A5	protein_coding
ENSG00000083812.12	578.397	0.0425851	0.0526516	0.808811	0.418624	0.587306	ZNF324	protein_coding
ENSG00000083814.13	262.945	0.417023	0.0887611	4.69826	2.6239e-06	2.50663e-05	ZNF671	protein_coding
ENSG00000083817.9	238.919	-0.0713732	0.076026	-0.9388	0.347833	0.517105	ZNF416	protein_coding
ENSG00000083828.16	762.387	-0.0185129	0.0592518	-0.312444	0.754703	0.853283	ZNF586	protein_coding
ENSG00000083838.16	291.466	-0.0401857	0.0582243	-0.690187	0.490076	0.652516	ZNF446	protein_coding
ENSG00000083844.10	2935.85	0.120985	0.0693846	1.74369	0.0812134	0.176509	ZNF264	protein_coding
ENSG00000083845.9	42813.9	-0.2644	0.0723095	-3.6565	0.000255678	0.00142002	RPS5	protein_coding
ENSG00000083857.14	22631.1	-0.003595	0.0910984	-0.0394628	0.968521	0.983167	FAT1	protein_coding
ENSG00000083896.13	4125.44	-0.0759176	0.0279451	-2.71667	0.00659423	0.0227807	YTHDC1	protein_coding
ENSG00000083937.10	4205.76	-0.251509	0.0565404	-4.44831	8.65472e-06	7.19638e-05	CHMP2B	protein_coding
ENSG00000084070.12	3681.62	0.781243	0.0674389	11.5845	4.9408e-31	3.95972e-29	SMAP2	protein_coding
ENSG00000084072.17	1735.82	-0.136858	0.0471782	-2.90088	0.00372118	0.0141105	PPIE	protein_coding
ENSG00000084073.10	4493.88	-0.156718	0.0467961	-3.34896	0.000811152	0.00382549	ZMPSTE24	protein_coding
ENSG00000084090.13	7650.4	-0.0429564	0.0458422	-0.93705	0.348733	0.517989	STARD7	protein_coding
ENSG00000084092.7	2384.38	-0.0808417	0.0506619	-1.59571	0.110553	0.22333	NOA1	protein_coding
ENSG00000084093.19	3685.04	0.0542557	0.0430866	1.25923	0.207949	0.359075	REST	protein_coding
ENSG00000084110.11	95.4575	-0.347416	0.165421	-2.10019	0.0357122	0.0920354	HAL	protein_coding
ENSG00000084112.15	4016.61	0.387368	0.0509195	7.60745	2.79565e-14	9.13468e-13	SSH1	protein_coding
ENSG00000084207.18	32953.4	-0.341891	0.0874168	-3.91104	9.18996e-05	0.000583712	GSTP1	protein_coding
ENSG00000084234.18	29866.4	-0.149256	0.0577684	-2.5837	0.00977466	0.0317298	APLP2	protein_coding
ENSG00000084444.14	318.439	0.0153625	0.105299	0.145893	0.884006	0.935685	FAM234B	protein_coding
ENSG00000084453.16	53.6166	-0.707339	0.242132	-2.92129	0.00348584	0.0133571	SLCO1A2	protein_coding
ENSG00000084463.8	6012.61	-0.0447534	0.0452553	-0.988911	0.322707	0.49098	WBP11	protein_coding
ENSG00000084623.12	10262.4	-0.191358	0.0487647	-3.92412	8.70475e-05	0.000557303	EIF3I	protein_coding
ENSG00000084628.10	26.7966	-0.639662	0.18959	-3.37392	0.000741057	0.00353935	NKAIN1	protein_coding
ENSG00000084636.18	3312.91	0.450302	0.110768	4.06527	4.79774e-05	0.000330886	COL16A1	protein_coding
ENSG00000084652.16	4301.94	0.0835449	0.0429198	1.94653	0.0515907	0.123243	TXLNA	protein_coding
ENSG00000084674.15	1319.05	0.0689654	0.296363	0.232706	0.81599	0.893306	APOB	protein_coding
ENSG00000084676.15	5261.73	0.18195	0.044844	4.05739	4.96244e-05	0.000341002	NCOA1	protein_coding
ENSG00000084693.16	1472.25	-0.137281	0.0582456	-2.35693	0.0184266	0.0535832	AGBL5	protein_coding
ENSG00000084710.14	263.259	0.0828027	0.138081	0.599667	0.548728	0.7012	EFR3B	protein_coding
ENSG00000084731.15	755.518	0.045998	0.105424	0.436317	0.662607	0.790545	KIF3C	protein_coding
ENSG00000084733.11	11543.4	-0.175907	0.0447246	-3.93311	8.38537e-05	0.000539594	RAB10	protein_coding
ENSG00000084734.9	147.893	-0.568452	0.187053	-3.03899	0.00237373	0.00962795	GCKR	protein_coding
ENSG00000084754.12	11271	-0.0714642	0.0486061	-1.47027	0.141488	0.269798	HADHA	protein_coding
ENSG00000084764.12	723.745	-0.305599	0.104331	-2.92912	0.00339924	0.0130812	MAPRE3	protein_coding
ENSG00000084774.14	6086.43	-0.0798538	0.0660973	-1.20812	0.226999	0.382292	CAD	protein_coding
ENSG00000085063.17	9757.36	0.0338397	0.0797218	0.424472	0.671221	0.797197	CD59	protein_coding
ENSG00000085117.12	5964.06	0.0895109	0.0856158	1.0455	0.295794	0.46174	CD82	protein_coding
ENSG00000085185.15	1866.82	-0.123489	0.0748078	-1.65075	0.0987888	0.204941	BCORL1	protein_coding
ENSG00000085224.23	9227.57	-0.0484983	0.0564284	-0.859468	0.390083	0.560002	ATRX	protein_coding
ENSG00000085231.14	760.366	-0.280248	0.059864	-4.68141	2.8491e-06	2.69717e-05	AK6	protein_coding
ENSG00000130720.13	564.818	-1.88077	0.24854	-7.56726	3.8119e-14	1.22759e-12	FIBCD1	protein_coding
ENSG00000085274.16	927.332	-0.118928	0.0480664	-2.47425	0.0133517	0.0410785	MYNN	protein_coding
ENSG00000085276.19	7877.67	-0.0765143	0.107216	-0.713645	0.475447	0.640043	MECOM	protein_coding
ENSG00000085365.18	3474.6	-0.124852	0.0544399	-2.29339	0.0218253	0.0615356	SCAMP1	protein_coding
ENSG00000085377.15	4028.04	-0.101107	0.0706226	-1.43165	0.152244	0.285251	PREP	protein_coding
ENSG00000085382.12	771.062	0.0138016	0.0608186	0.226931	0.820477	0.896464	HACE1	protein_coding
ENSG00000085415.16	2987.32	-0.269001	0.0622498	-4.32131	1.55107e-05	0.000121054	SEH1L	protein_coding
ENSG00000085433.16	844.292	0.0853657	0.0527945	1.61694	0.105891	0.216273	WDR47	protein_coding
ENSG00000085449.15	3341.92	0.118173	0.0528094	2.23772	0.0252393	0.0692873	WDFY1	protein_coding
ENSG00000085465.13	160.191	-0.313502	0.113032	-2.77357	0.00554448	0.0197148	OVGP1	protein_coding
ENSG00000085491.17	4712.74	-0.176553	0.0650713	-2.71322	0.00666329	0.0229677	SLC25A24	protein_coding
ENSG00000085511.20	1776.11	-0.0396178	0.050117	-0.790507	0.429232	0.597247	MAP3K4	protein_coding
ENSG00000085552.17	1674.62	-0.398921	0.130571	-3.05522	0.00224898	0.00919857	IGSF9	protein_coding
ENSG00000085563.15	586.961	0.567424	0.135581	4.18515	2.84982e-05	0.000208278	ABCB1	protein_coding
ENSG00000085644.14	1945.48	-0.142143	0.0553088	-2.56999	0.0101701	0.0327735	ZNF213	protein_coding
ENSG00000085662.14	2777.39	0.400546	0.0960241	4.17131	3.02854e-05	0.000219741	AKR1B1	protein_coding
ENSG00000085719.13	8297.76	-0.215337	0.067712	-3.1802	0.00147174	0.00639258	CPNE3	protein_coding
ENSG00000085721.13	2630.28	-0.106957	0.0483455	-2.21236	0.0269421	0.0731782	RRN3	protein_coding
ENSG00000085733.16	11627.3	-0.314799	0.0703088	-4.47738	7.55659e-06	6.37484e-05	CTTN	protein_coding
ENSG00000085760.15	2363.71	-0.253375	0.0511371	-4.95481	7.23994e-07	7.84203e-06	MTIF2	protein_coding
ENSG00000085788.14	2163.7	-0.100586	0.0628153	-1.60129	0.109312	0.221483	DDHD2	protein_coding
ENSG00000085831.15	2156.39	-0.452391	0.120773	-3.7458	0.000179821	0.00104693	TTC39A	protein_coding
ENSG00000085832.17	4635.48	0.273169	0.0419494	6.51187	7.42193e-11	1.65857e-09	EPS15	protein_coding
ENSG00000085840.13	719.023	0.0456706	0.09457	0.482929	0.629146	0.765592	ORC1	protein_coding
ENSG00000085871.9	3443.17	-0.379499	0.079918	-4.7486	2.04827e-06	2.00775e-05	MGST2	protein_coding
ENSG00000085872.15	4019.81	0.0548936	0.059279	0.926021	0.354435	0.523991	CHERP	protein_coding
ENSG00000085978.22	1968.6	-0.135442	0.0444371	-3.04794	0.00230413	0.00939398	ATG16L1	protein_coding
ENSG00000085982.14	2348	-0.172232	0.0474609	-3.62893	0.0002846	0.00155572	USP40	protein_coding
ENSG00000085998.14	3455.23	-0.12171	0.0484801	-2.51051	0.0120557	0.0377306	POMGNT1	protein_coding
ENSG00000085999.13	466.73	-0.0474813	0.0913819	-0.519592	0.603348	0.745632	RAD54L	protein_coding
ENSG00000086015.22	5656.61	-0.0788016	0.0564122	-1.39689	0.162446	0.29931	MAST2	protein_coding
ENSG00000086061.16	10123.8	-0.000268329	0.0632001	-0.00424571	0.996612	0.99834	DNAJA1	protein_coding
ENSG00000086062.13	12157.2	0.0154194	0.0733596	0.21019	0.83352	0.904433	B4GALT1	protein_coding
ENSG00000086065.14	4241.57	-0.211563	0.0624851	-3.38582	0.000709656	0.0034079	CHMP5	protein_coding
ENSG00000086102.19	3426.17	-0.0834098	0.0524294	-1.5909	0.111633	0.224929	NFX1	protein_coding
ENSG00000086159.13	26.3206	-0.649498	0.172948	-3.75544	0.000173035	0.00101402	AQP6	protein_coding
ENSG00000086189.10	696.98	0.0891589	0.053547	1.66506	0.0959013	0.200591	DIMT1	protein_coding
ENSG00000086200.17	1409.44	0.0523841	0.0480255	1.09076	0.27538	0.438882	IPO11	protein_coding
ENSG00000086205.18	284.192	0.401754	0.164434	2.44325	0.0145556	0.044077	FOLH1	protein_coding
ENSG00000086232.13	13854.3	-0.312578	0.0457706	-6.82924	8.53651e-12	2.15861e-10	EIF2AK1	protein_coding
ENSG00000086288.12	18.773	0.770963	0.132389	5.82348	5.76343e-09	9.65306e-08	NME8	protein_coding
ENSG00000086289.12	861.819	-0.154936	0.128265	-1.20794	0.22707	0.382347	EPDR1	protein_coding
ENSG00000086300.16	1318.76	0.710741	0.0899254	7.90366	2.70822e-15	9.53946e-14	SNX10	protein_coding
ENSG00000086475.15	3282.15	-0.140409	0.0514563	-2.7287	0.00635843	0.022098	SEPHS1	protein_coding
ENSG00000086504.17	2463.55	-0.0627966	0.0654335	-0.959702	0.337205	0.506557	MRPL28	protein_coding
ENSG00000086506.3	6.31153	-0.566145	0.231344	-2.4472	0.0143973	0.0436863	HBQ1	protein_coding
ENSG00000086544.3	2736.11	-0.0430915	0.0832175	-0.517818	0.604585	0.74656	ITPKC	protein_coding
ENSG00000086548.9	40806.8	-0.603754	0.207892	-2.90418	0.00368221	0.0139821	CEACAM6	protein_coding
ENSG00000086589.12	3624.17	-0.0169456	0.04299	-0.394175	0.693452	0.812902	RBM22	protein_coding
ENSG00000086598.11	16593.8	-0.16734	0.0501288	-3.3382	0.00084324	0.0039571	TMED2	protein_coding
ENSG00000086619.14	860.785	-0.26978	0.107781	-2.50304	0.0123131	0.0383847	ERO1B	protein_coding
ENSG00000086666.19	3174.01	-0.14075	0.0458403	-3.07043	0.0021375	0.00880334	ZFAND6	protein_coding
ENSG00000086696.11	2049.82	-0.590957	0.164008	-3.60321	0.000314311	0.00169739	HSD17B2	protein_coding
ENSG00000086712.13	2117.64	-0.168033	0.0630069	-2.6669	0.00765535	0.0258017	TXLNG	protein_coding
ENSG00000086717.18	35.9175	0.194988	0.124782	1.56263	0.11814	0.235007	PPEF1	protein_coding
ENSG00000086758.16	24866.5	0.0353437	0.0525637	0.672399	0.50133	0.662089	HUWE1	protein_coding
ENSG00000086827.9	1349.94	-0.115041	0.054074	-2.12747	0.0333814	0.0871138	ZW10	protein_coding
ENSG00000086848.15	414.496	0.012749	0.053974	0.236206	0.813273	0.891661	ALG9	protein_coding
ENSG00000016602.9	92.2575	-1.86426	0.270109	-6.90186	5.1327e-12	1.33142e-10	CLCA4	protein_coding
ENSG00000086991.13	237.121	0.349229	0.116848	2.98875	0.00280125	0.0110816	NOX4	protein_coding
ENSG00000087008.16	1142.73	-0.0080675	0.0592453	-0.136171	0.891686	0.940272	ACOX3	protein_coding
ENSG00000087053.20	3398.38	-0.113087	0.0546544	-2.06913	0.0385343	0.097863	MTMR2	protein_coding
ENSG00000087074.8	4948.98	-0.0217766	0.0782846	-0.278172	0.78088	0.870493	PPP1R15A	protein_coding
ENSG00000087076.9	400.182	0.164391	0.133953	1.22723	0.219737	0.373564	HSD17B14	protein_coding
ENSG00000087077.14	2985.25	0.0061	0.102475	0.0595269	0.952532	0.974661	TRIP6	protein_coding
ENSG00000087085.16	1677.52	0.205513	0.185775	1.10625	0.268618	0.431405	ACHE	protein_coding
ENSG00000087086.15	169328	0.1043	0.0808991	1.28926	0.197308	0.34568	FTL	protein_coding
ENSG00000087087.20	6061.51	-0.147281	0.0460664	-3.19715	0.00138795	0.00608129	SRRT	protein_coding
ENSG00000087088.20	3168.74	0.121451	0.0728564	1.66699	0.0955168	0.2	BAX	protein_coding
ENSG00000087095.13	1415.43	-0.181926	0.0494715	-3.6774	0.000235622	0.00132237	NLK	protein_coding
ENSG00000087111.21	3785.92	-0.109997	0.0578939	-1.89998	0.0574352	0.134316	PIGS	protein_coding
ENSG00000087116.16	4941.27	0.688737	0.124502	5.53194	3.16711e-08	4.62729e-07	ADAMTS2	protein_coding
ENSG00000137975.8	72.2977	-1.85967	0.276408	-6.728	1.72012e-11	4.20275e-10	CLCA2	protein_coding
ENSG00000087152.15	4348	-0.0975871	0.0502446	-1.94224	0.0521081	0.124237	ATXN7L3	protein_coding
ENSG00000087157.19	1222.03	0.10148	0.0404814	2.50682	0.0121823	0.0380517	PGS1	protein_coding
ENSG00000087191.13	4502.27	-0.133105	0.0456862	-2.91346	0.00357451	0.0136363	PSMC5	protein_coding
ENSG00000087206.17	1113.02	-0.0381315	0.040638	-0.938321	0.348079	0.517349	UIMC1	protein_coding
ENSG00000087237.12	145.707	0.736908	0.0983654	7.49154	6.80688e-14	2.13618e-12	CETP	protein_coding
ENSG00000087245.13	20879	0.539051	0.128433	4.19713	2.70319e-05	0.000198743	MMP2	protein_coding
ENSG00000087250.9	10.238	-0.512982	0.238427	-2.15153	0.0314347	0.0830295	MT3	protein_coding
ENSG00000087253.13	2304.5	-0.301723	0.0931634	-3.23865	0.00120098	0.00537203	LPCAT2	protein_coding
ENSG00000087258.16	1248.41	0.656264	0.190841	3.43881	0.000584285	0.00289483	GNAO1	protein_coding
ENSG00000087263.17	1862.25	-0.0881199	0.0412696	-2.13522	0.0327427	0.0857571	OGFOD1	protein_coding
ENSG00000087266.17	3805.72	0.0658109	0.052691	1.249	0.211666	0.3637	SH3BP2	protein_coding
ENSG00000087269.16	2035.65	-0.169113	0.0571261	-2.96035	0.00307292	0.0120057	NOP14	protein_coding
ENSG00000087274.17	12460.4	0.188138	0.0475688	3.95506	7.65151e-05	0.000498432	ADD1	protein_coding
ENSG00000087299.12	908.435	-0.255853	0.0597089	-4.28501	1.82732e-05	0.000140148	L2HGDH	protein_coding
ENSG00000087301.9	878.644	-0.117101	0.0708067	-1.65381	0.0981666	0.203986	TXNDC16	protein_coding
ENSG00000087302.9	6244.61	-0.220946	0.0502997	-4.3926	1.12003e-05	9.03371e-05	RTRAF	protein_coding
ENSG00000087303.18	2209.02	0.5095	0.10117	5.0361	4.75117e-07	5.41069e-06	NID2	protein_coding
ENSG00000087338.5	2643.7	-0.192098	0.0503947	-3.81188	0.000137914	0.000830561	GMCL1	protein_coding
ENSG00000087365.16	11276.7	-0.00759055	0.0386585	-0.196349	0.844337	0.911937	SF3B2	protein_coding
ENSG00000087448.11	2296.03	-0.0539981	0.0859872	-0.627978	0.530018	0.686258	KLHL42	protein_coding
ENSG00000087460.27	70081.4	-0.261191	0.0697969	-3.74215	0.000182449	0.00106022	GNAS	protein_coding
ENSG00000087470.18	4850.94	-0.0114579	0.0544773	-0.210324	0.833415	0.904396	DNM1L	protein_coding
ENSG00000087494.16	146.331	0.0269198	0.14352	0.187568	0.851215	0.916095	PTHLH	protein_coding
ENSG00000087495.17	197.63	-0.492981	0.221381	-2.22685	0.0259576	0.0709505	PHACTR3	protein_coding
ENSG00000087502.18	2431.07	-0.0704498	0.0652485	-1.07971	0.280269	0.44436	ERGIC2	protein_coding
ENSG00000087510.7	410.7	-0.749697	0.194825	-3.84805	0.00011906	0.000731147	TFAP2C	protein_coding
ENSG00000087586.18	2761.21	-0.285118	0.103731	-2.74863	0.00598447	0.021021	AURKA	protein_coding
ENSG00000163202.5	7.73062	-1.85426	0.52024	-3.56424	0.000364914	0.00193419	LCE3D	protein_coding
ENSG00000087842.11	702.625	-0.262847	0.09281	-2.8321	0.00462432	0.016921	PIR	protein_coding
ENSG00000087884.14	256.594	-0.0324682	0.0774211	-0.419371	0.674945	0.799631	AAMDC	protein_coding
ENSG00000087903.13	983.374	-0.128799	0.0938381	-1.37256	0.169888	0.309646	RFX2	protein_coding
ENSG00000087995.16	1281.64	-0.199129	0.0473837	-4.20248	2.64006e-05	0.000194683	METTL2A	protein_coding
ENSG00000088002.12	727.868	-0.775956	0.184195	-4.21268	2.52361e-05	0.000186993	SULT2B1	protein_coding
ENSG00000088035.18	1113.96	-0.197741	0.0525741	-3.76118	0.000169112	0.000994345	ALG6	protein_coding
ENSG00000088038.19	3650.5	-0.138477	0.0560655	-2.46991	0.0135145	0.0414886	CNOT3	protein_coding
ENSG00000088053.11	35.9474	-0.0695372	0.13673	-0.508574	0.611051	0.751602	GP6	protein_coding
ENSG00000088179.9	1681.6	0.0196269	0.0496904	0.394983	0.692855	0.812498	PTPN4	protein_coding
ENSG00000088205.13	5760.16	-0.206495	0.0461387	-4.47554	7.62185e-06	6.42549e-05	DDX18	protein_coding
ENSG00000088247.17	14084.4	-0.0332006	0.0552802	-0.600588	0.548115	0.70078	KHSRP	protein_coding
ENSG00000088256.9	6543.52	-0.201148	0.0589971	-3.40945	0.00065094	0.00317017	GNA11	protein_coding
ENSG00000088280.19	970.01	0.193899	0.101813	1.90445	0.0568515	0.133166	ASAP3	protein_coding
ENSG00000088298.13	2500.79	-0.127216	0.0571592	-2.22565	0.026038	0.0711149	EDEM2	protein_coding
ENSG00000088305.18	684.619	-0.501951	0.133354	-3.76406	0.000167178	0.00098431	DNMT3B	protein_coding
ENSG00000088320.4	120.521	0.719692	0.116059	6.20109	5.60723e-10	1.11303e-08	REM1	protein_coding
ENSG00000088325.16	7038.96	-0.376575	0.0946631	-3.97806	6.948e-05	0.000457387	TPX2	protein_coding
ENSG00000088356.6	1113.45	-0.323914	0.0666387	-4.86074	1.16945e-06	1.21048e-05	PDRG1	protein_coding
ENSG00000088367.23	8861.88	-0.241512	0.0834726	-2.89331	0.00381201	0.0143856	EPB41L1	protein_coding
ENSG00000088386.17	540.143	-0.577193	0.248493	-2.32277	0.0201914	0.0577674	SLC15A1	protein_coding
ENSG00000088387.19	4381.88	-0.00508573	0.0651004	-0.0781213	0.937732	0.966065	DOCK9	protein_coding
ENSG00000088448.14	5117.44	-0.236209	0.0650111	-3.63337	0.000279749	0.00153414	ANKRD10	protein_coding
ENSG00000088451.11	1133.96	-0.291238	0.0565698	-5.1483	2.62854e-07	3.16479e-06	TGDS	protein_coding
ENSG00000088538.13	206.157	0.0293007	0.151672	0.193185	0.846814	0.913396	DOCK3	protein_coding
ENSG00000088543.15	206.346	0.291837	0.104059	2.80453	0.00503906	0.0181804	C3orf18	protein_coding
ENSG00000088682.14	2832.86	-0.268993	0.0541786	-4.96494	6.87227e-07	7.48994e-06	COQ9	protein_coding
ENSG00000088726.16	50.6143	-0.509585	0.239796	-2.12508	0.0335799	0.087535	TMEM40	protein_coding
ENSG00000088727.13	534.964	-0.388347	0.0643173	-6.03799	1.5605e-09	2.88031e-08	KIF9	protein_coding
ENSG00000088756.13	305.527	0.319623	0.127597	2.50495	0.0122468	0.0382191	ARHGAP28	protein_coding
ENSG00000088766.12	603.111	-0.239086	0.0700104	-3.41501	0.000637794	0.0031185	CRLS1	protein_coding
ENSG00000088782.5	0.813819	0.406364	0.536461	0.757489	0.448757	0.616016	DEFB127	protein_coding
ENSG00000088808.18	2726.24	-0.209901	0.0553194	-3.79435	0.000148032	0.000884133	PPP1R13B	protein_coding
ENSG00000088812.18	6798.84	-0.171256	0.0777745	-2.20195	0.0276686	0.0747594	ATRN	protein_coding
ENSG00000088826.18	1536.08	-0.644046	0.0965064	-6.67361	2.49588e-11	5.98816e-10	SMOX	protein_coding
ENSG00000198092.6	6.03391	-1.83888	0.38159	-4.81898	1.44292e-06	1.467e-05	TMPRSS11F	protein_coding
ENSG00000088832.18	16618.9	-0.239254	0.0525741	-4.55079	5.34438e-06	4.6987e-05	FKBP1A	protein_coding
ENSG00000088833.17	4996.32	-0.235159	0.0485185	-4.84679	1.25473e-06	1.28953e-05	NSFL1C	protein_coding
ENSG00000088836.14	1417.68	-0.268736	0.144799	-1.85592	0.0634645	0.145323	SLC4A11	protein_coding
ENSG00000088854.12	1362.47	0.321589	0.106595	3.01693	0.00255348	0.0102364	C20orf194	protein_coding
ENSG00000088876.13	661.833	-0.185999	0.054001	-3.44436	0.000572421	0.00284465	ZNF343	protein_coding
ENSG00000088881.21	834.697	0.101295	0.130087	0.778666	0.436176	0.604364	EBF4	protein_coding
ENSG00000088882.8	1181.94	0.907775	0.131921	6.88122	5.93412e-12	1.52723e-10	CPXM1	protein_coding
ENSG00000088888.18	12800.1	-0.218865	0.0607777	-3.60108	0.000316904	0.00170895	MAVS	protein_coding
ENSG00000088899.15	3329.84	-0.457063	0.124933	-3.65847	0.000253725	0.00141124	LZTS3	protein_coding
ENSG00000088926.14	23.2082	-0.161103	0.259052	-0.621895	0.534011	0.689755	F11	protein_coding
ENSG00000088930.8	7327.79	-0.145615	0.0541678	-2.68822	0.00718336	0.0244605	XRN2	protein_coding
ENSG00000088970.16	1224.66	-0.322292	0.0912345	-3.53257	0.000411541	0.00214365	KIZ	protein_coding
ENSG00000088986.11	11805.2	-0.288541	0.052415	-5.50492	3.69333e-08	5.34377e-07	DYNLL1	protein_coding
ENSG00000088992.18	4265.25	-0.531102	0.162536	-3.2676	0.00108462	0.00492869	TESC	protein_coding
ENSG00000089006.17	6586.98	-0.222252	0.057331	-3.87664	0.000105909	0.000659611	SNX5	protein_coding
ENSG00000089009.15	39089.9	-0.211199	0.0600595	-3.51649	0.000437291	0.00225984	RPL6	protein_coding
ENSG00000269586.7	15.5473	-1.83066	0.611472	-2.99385	0.00275477	0.0109223	CT45A10	protein_coding
ENSG00000089022.14	2329.83	-0.132128	0.0414688	-3.1862	0.00144153	0.00627852	MAPKAPK5	protein_coding
ENSG00000089048.14	2289.66	-0.553568	0.073279	-7.55425	4.21275e-14	1.34786e-12	ESF1	protein_coding
ENSG00000089050.16	2285.01	-0.186824	0.0593404	-3.14834	0.00164199	0.00702845	RBBP9	protein_coding
ENSG00000089053.13	6249.2	-0.0256412	0.0424482	-0.604058	0.545805	0.698914	ANAPC5	protein_coding
ENSG00000089057.15	2356.12	0.0651056	0.0766347	0.849558	0.395571	0.565078	SLC23A2	protein_coding
ENSG00000089060.11	2759.09	0.163652	0.0564122	2.901	0.00371973	0.0141072	SLC8B1	protein_coding
ENSG00000089063.15	7350.52	-0.296682	0.0584603	-5.07493	3.87641e-07	4.49883e-06	TMEM230	protein_coding
ENSG00000089091.16	193.528	-0.235863	0.0800485	-2.9465	0.00321397	0.0124707	DZANK1	protein_coding
ENSG00000089094.19	2465.88	0.271053	0.0496952	5.4543	4.91654e-08	6.93417e-07	KDM2B	protein_coding
ENSG00000089101.19	25.8332	-0.150042	0.135792	-1.10494	0.269184	0.432043	CFAP61	protein_coding
ENSG00000089116.4	12.1028	-0.553782	0.265368	-2.08685	0.0369018	0.0945369	LHX5	protein_coding
ENSG00000089123.16	757.881	-0.262737	0.0531324	-4.94495	7.61625e-07	8.20268e-06	TASP1	protein_coding
ENSG00000089127.14	5944.85	-0.00805233	0.104436	-0.0771033	0.938541	0.966472	OAS1	protein_coding
ENSG00000089154.11	11261.2	0.000244578	0.0586006	0.00417364	0.99667	0.998364	GCN1	protein_coding
ENSG00000089157.16	96689.4	-0.303819	0.0635528	-4.78057	1.74797e-06	1.74612e-05	RPLP0	protein_coding
ENSG00000089159.16	4284.96	-0.109814	0.0653287	-1.68094	0.092774	0.195655	PXN	protein_coding
ENSG00000089163.4	43.2372	-0.114313	0.0926599	-1.23369	0.21732	0.37062	SIRT4	protein_coding
ENSG00000089169.15	18.3179	0.425896	0.161505	2.63704	0.00836334	0.0278333	RPH3A	protein_coding
ENSG00000089177.19	2399.23	-0.279878	0.0648259	-4.31737	1.57897e-05	0.000122979	KIF16B	protein_coding
ENSG00000089195.15	1516.87	-0.350794	0.0677043	-5.18127	2.20381e-07	2.69697e-06	TRMT6	protein_coding
ENSG00000188100.9	0.921376	-1.82406	0.538268	-3.38875	0.000702129	0.00337604	FAM25A	protein_coding
ENSG00000089220.5	11883.8	-0.213674	0.0599581	-3.56372	0.000365642	0.00193655	PEBP1	protein_coding
ENSG00000089225.20	37.9179	-0.0408203	0.27235	-0.149882	0.880858	0.933722	TBX5	protein_coding
ENSG00000089234.16	1665.35	-0.00455459	0.0381967	-0.11924	0.905085	0.948371	BRAP	protein_coding
ENSG00000089248.7	7402.33	-0.0515009	0.057258	-0.899454	0.368411	0.538605	ERP29	protein_coding
ENSG00000089250.19	93.5689	0.368665	0.224094	1.64514	0.0999418	0.206662	NOS1	protein_coding
ENSG00000089280.19	11005.2	-0.0658578	0.0447203	-1.47266	0.140843	0.268941	FUS	protein_coding
ENSG00000089289.16	3108.47	-0.13784	0.0531291	-2.59443	0.00947472	0.030907	IGBP1	protein_coding
ENSG00000089327.15	11542	-0.0499124	0.0998283	-0.499983	0.617087	0.755947	FXYD5	protein_coding
ENSG00000089335.21	1213.42	-0.105918	0.0744853	-1.422	0.155028	0.28923	ZNF302	protein_coding
ENSG00000089351.14	5206.61	0.20822	0.0769475	2.70601	0.00680976	0.0233956	GRAMD1A	protein_coding
ENSG00000089356.18	196.64	-0.387573	0.120833	-3.2075	0.00133895	0.00589645	FXYD3	protein_coding
ENSG00000089472.16	5533.29	-0.094199	0.137635	-0.684413	0.493715	0.655409	HEPH	protein_coding
ENSG00000089486.17	1493.64	0.0408181	0.0989805	0.412386	0.680057	0.803328	CDIP1	protein_coding
ENSG00000089505.18	109.997	0.0886634	0.0764881	1.15918	0.246383	0.405744	CMTM1	protein_coding
ENSG00000089558.9	61.4986	0.227864	0.123136	1.85051	0.0642408	0.146707	KCNH4	protein_coding
ENSG00000089597.18	27718	-0.0201727	0.0481296	-0.419134	0.675118	0.799687	GANAB	protein_coding
ENSG00000089639.11	2721.66	0.43596	0.0644066	6.76888	1.29784e-11	3.20925e-10	GMIP	protein_coding
ENSG00000089682.16	1146.46	-0.104929	0.0608002	-1.7258	0.0843833	0.181737	RBM41	protein_coding
ENSG00000089685.15	2301.62	-0.296731	0.0973973	-3.0466	0.00231445	0.00943029	BIRC5	protein_coding
ENSG00000134216.19	12.1513	-1.81674	0.419045	-4.33544	1.45471e-05	0.00011446	CHIA	protein_coding
ENSG00000089693.11	12306.4	-0.206455	0.0557465	-3.70345	0.000212684	0.00120921	MLF2	protein_coding
ENSG00000089723.10	351.325	-0.625628	0.113959	-5.48994	4.02062e-08	5.77654e-07	OTUB2	protein_coding
ENSG00000089737.17	7349.19	0.0594678	0.0368157	1.61528	0.106249	0.216798	DDX24	protein_coding
ENSG00000089775.12	1074.97	0.263567	0.0532801	4.94682	7.54344e-07	8.1296e-06	ZBTB25	protein_coding
ENSG00000089818.18	1567.21	-0.130157	0.0495675	-2.62584	0.00864342	0.0286222	NECAP1	protein_coding
ENSG00000089820.16	2262.39	0.314883	0.108793	2.89434	0.00379953	0.0143464	ARHGAP4	protein_coding
ENSG00000089847.12	89.8767	0.185986	0.0995913	1.86749	0.0618326	0.142413	ANKRD24	protein_coding
ENSG00000089876.12	1895.92	-0.31151	0.0678971	-4.58798	4.47561e-06	4.01963e-05	DHX32	protein_coding
ENSG00000089902.10	3889.66	-0.117999	0.0670689	-1.75936	0.0785157	0.172067	RCOR1	protein_coding
ENSG00000089916.18	2090.06	0.144487	0.0510753	2.8289	0.00467077	0.0170707	GPATCH2L	protein_coding
ENSG00000090006.18	14398.6	0.377934	0.0951682	3.97122	7.15061e-05	0.000468657	LTBP4	protein_coding
ENSG00000090013.11	4473.8	-0.158187	0.0914518	-1.72973	0.0836784	0.180586	BLVRB	protein_coding
ENSG00000090020.11	9537.9	-0.208755	0.0983043	-2.12356	0.0337066	0.0878234	SLC9A1	protein_coding
ENSG00000090054.15	4974.88	-0.142508	0.0450129	-3.16592	0.00154591	0.00666824	SPTLC1	protein_coding
ENSG00000090060.18	14792	-0.208745	0.0386354	-5.40294	6.55589e-08	9.01628e-07	PAPOLA	protein_coding
ENSG00000090061.17	894.183	-0.0189491	0.051095	-0.370859	0.710742	0.824474	CCNK	protein_coding
ENSG00000090097.22	1739.27	-0.2179	0.0682194	-3.19411	0.00140261	0.0061329	PCBP4	protein_coding
ENSG00000170523.3	7.64841	-1.81327	0.295906	-6.12786	8.90702e-10	1.71679e-08	KRT83	protein_coding
ENSG00000090238.12	2933.22	0.0664086	0.075979	0.874039	0.382097	0.552324	YPEL3	protein_coding
ENSG00000090263.16	1562.81	-0.384352	0.0651984	-5.8951	3.74444e-09	6.52004e-08	MRPS33	protein_coding
ENSG00000090266.13	2219.71	-0.295709	0.0626853	-4.71736	2.38925e-06	2.30847e-05	NDUFB2	protein_coding
ENSG00000090273.14	6090.25	-0.0887362	0.05586	-1.58855	0.112163	0.225776	NUDC	protein_coding
ENSG00000090316.16	4629.74	-0.20538	0.0504209	-4.07331	4.63492e-05	0.000321187	MAEA	protein_coding
ENSG00000196754.13	682.323	-1.81148	0.212678	-8.51748	1.63057e-17	6.74827e-16	S100A2	protein_coding
ENSG00000090372.15	6793.78	-0.124811	0.0507514	-2.45926	0.0139223	0.0424888	STRN4	protein_coding
ENSG00000090376.11	1415.36	0.290388	0.137257	2.11565	0.0343748	0.0892432	IRAK3	protein_coding
ENSG00000090382.7	73810.9	-0.164851	0.183586	-0.897951	0.369212	0.539499	LYZ	protein_coding
ENSG00000090402.8	2772.2	0.111653	0.294347	0.379326	0.704446	0.82008	SI	protein_coding
ENSG00000090432.7	1922.08	0.0161111	0.0469374	0.343247	0.731413	0.837963	MUL1	protein_coding
ENSG00000090447.12	1351.08	-0.204092	0.0656261	-3.10992	0.00187138	0.00786262	TFAP4	protein_coding
ENSG00000090470.15	1203.6	0.00352605	0.0439102	0.0803014	0.935998	0.965259	PDCD7	protein_coding
ENSG00000090487.11	5008.01	-0.192079	0.0405356	-4.73854	2.15266e-06	2.09884e-05	SPG21	protein_coding
ENSG00000175121.11	8.78071	-1.8111	0.271436	-6.67228	2.51867e-11	6.03109e-10	WFDC5	protein_coding
ENSG00000090520.11	2605.52	-0.207145	0.0630015	-3.28793	0.00100927	0.00462854	DNAJB11	protein_coding
ENSG00000090530.10	1148	0.100225	0.151098	0.663311	0.507132	0.667351	P3H2	protein_coding
ENSG00000090534.20	40.7006	0.254065	0.185087	1.37268	0.169853	0.309606	THPO	protein_coding
ENSG00000090539.15	447.989	0.498342	0.118402	4.20889	2.56624e-05	0.00018978	CHRD	protein_coding
ENSG00000090554.13	18.4116	0.49321	0.115678	4.26365	2.01112e-05	0.000152674	FLT3LG	protein_coding
ENSG00000090565.17	2694.03	0.222452	0.0777472	2.86122	0.00422013	0.0156586	RAB11FIP3	protein_coding
ENSG00000090581.10	2601.93	-0.0319342	0.0552897	-0.57758	0.563548	0.713376	GNPTG	protein_coding
ENSG00000090612.22	1083.17	-0.0442687	0.0815852	-0.542607	0.5874	0.732583	ZNF268	protein_coding
ENSG00000090615.15	7298.57	0.107315	0.0560908	1.91324	0.0557172	0.13102	GOLGA3	protein_coding
ENSG00000090621.15	10323.9	-0.175871	0.0661577	-2.65836	0.00785231	0.0263752	PABPC4	protein_coding
ENSG00000081277.13	536.138	-1.81025	0.251566	-7.19592	6.20412e-13	1.77702e-11	PKP1	protein_coding
ENSG00000090661.12	1002.67	-0.228019	0.159733	-1.4275	0.153435	0.287059	CERS4	protein_coding
ENSG00000090674.16	1241.22	0.185526	0.056431	3.28766	0.00101024	0.00463213	MCOLN1	protein_coding
ENSG00000090686.16	3702.1	0.0522839	0.0505077	1.03517	0.300591	0.466961	USP48	protein_coding
ENSG00000090776.6	5666.46	-0.254812	0.0913931	-2.78808	0.00530206	0.01899	EFNB1	protein_coding
ENSG00000090857.14	2416.05	0.115386	0.0653875	1.76466	0.0776214	0.170548	PDPR	protein_coding
ENSG00000090861.17	8279.4	-0.0961063	0.0646448	-1.48668	0.137099	0.263488	AARS1	protein_coding
ENSG00000090863.12	14283.1	0.0449294	0.0474533	0.946812	0.343734	0.512747	GLG1	protein_coding
ENSG00000090889.12	1606.85	-0.238997	0.0921313	-2.59409	0.00948424	0.030928	KIF4A	protein_coding
ENSG00000090905.19	4213.58	0.124195	0.0454572	2.73213	0.00629265	0.0219115	TNRC6A	protein_coding
ENSG00000090924.15	3226.39	0.35018	0.0753142	4.64958	3.32605e-06	3.09978e-05	PLEKHG2	protein_coding
ENSG00000090932.11	47.2579	-0.271862	0.225176	-1.20733	0.227305	0.382576	DLL3	protein_coding
ENSG00000090971.5	480.775	-0.175819	0.103311	-1.70184	0.088785	0.189191	NAT14	protein_coding
ENSG00000090975.13	1491.96	0.242002	0.0765937	3.15955	0.00158011	0.00679967	PITPNM2	protein_coding
ENSG00000090989.18	1967.17	-0.0805385	0.0471712	-1.70736	0.0877545	0.187496	EXOC1	protein_coding
ENSG00000091009.8	1273.66	-0.161348	0.0440309	-3.66444	0.000247885	0.00138314	RBM27	protein_coding
ENSG00000091010.6	6.31597	0.00619661	0.132828	0.0466514	0.962791	0.980225	POU4F3	protein_coding
ENSG00000091039.17	4742.98	0.245794	0.0577464	4.25644	2.07705e-05	0.000156977	OSBPL8	protein_coding
ENSG00000091073.19	3206.6	-0.11895	0.0852313	-1.39561	0.162831	0.299845	DTX2	protein_coding
ENSG00000091106.19	129.366	0.940171	0.074792	12.5705	3.06864e-36	3.05672e-34	NLRC4	protein_coding
ENSG00000091127.14	1749.76	-0.578291	0.0793415	-7.28863	3.13111e-13	9.23163e-12	PUS7	protein_coding
ENSG00000091128.13	22.6024	0.0965474	0.153928	0.627225	0.530512	0.686605	LAMB4	protein_coding
ENSG00000091129.21	1072.26	-0.24782	0.183233	-1.35249	0.17622	0.31837	NRCAM	protein_coding
ENSG00000091136.15	11161.5	0.246713	0.0759705	3.24748	0.00116433	0.00523083	LAMB1	protein_coding
ENSG00000091137.14	37.8188	0.15894	0.111717	1.42271	0.154821	0.288993	SLC26A4	protein_coding
ENSG00000091138.13	686.307	0.532326	0.286386	1.85877	0.0630597	0.144637	SLC26A3	protein_coding
ENSG00000091140.14	4943.45	-0.210127	0.0605992	-3.4675	0.000525331	0.00264293	DLD	protein_coding
ENSG00000091157.14	1351.56	0.397395	0.0589538	6.74079	1.57527e-11	3.86807e-10	WDR7	protein_coding
ENSG00000091164.13	3857.2	-0.0726073	0.0533773	-1.36026	0.173746	0.315011	TXNL1	protein_coding
ENSG00000091262.16	645.64	-0.0778487	0.131944	-0.590015	0.555181	0.706317	ABCC6	protein_coding
ENSG00000091317.8	5786.77	-0.0395708	0.0560853	-0.705547	0.48047	0.644258	CMTM6	protein_coding
ENSG00000091409.15	17908.7	-0.184934	0.0893141	-2.0706	0.0383959	0.0975771	ITGA6	protein_coding
ENSG00000091428.18	441.06	-0.0567044	0.101217	-0.560223	0.575327	0.722968	RAPGEF4	protein_coding
ENSG00000091436.17	7414.14	0.0658995	0.11247	0.585929	0.557924	0.708675	MAP3K20	protein_coding
ENSG00000091482.8	85.6581	0.420592	0.30159	1.39458	0.163141	0.300317	SMPX	protein_coding
ENSG00000091483.7	3885.7	-0.303104	0.0571441	-5.3042	1.1317e-07	1.4795e-06	FH	protein_coding
ENSG00000091490.11	12543.9	-0.00452068	0.0740863	-0.0610191	0.951344	0.974048	SEL1L3	protein_coding
ENSG00000091513.16	246.467	-0.556403	0.232421	-2.39395	0.0166682	0.0492839	TF	protein_coding
ENSG00000091527.16	9502.21	0.129017	0.0425178	3.03443	0.00240994	0.00974912	CDV3	protein_coding
ENSG00000091536.19	72.0908	-0.0467819	0.11001	-0.42525	0.670655	0.796754	MYO15A	protein_coding
ENSG00000091542.9	4453.73	0.0228012	0.0456886	0.499056	0.61774	0.756483	ALKBH5	protein_coding
ENSG00000091592.16	1159.05	0.804993	0.106764	7.53996	4.70122e-14	1.49443e-12	NLRP1	protein_coding
ENSG00000091622.16	1246.02	-0.227678	0.14404	-1.58066	0.113957	0.228685	PITPNM3	protein_coding
ENSG00000091640.8	1483.04	0.0434068	0.0499478	0.869044	0.384823	0.554819	SPAG7	protein_coding
ENSG00000091651.9	634.922	-0.413453	0.0907986	-4.55352	5.27563e-06	4.64822e-05	ORC6	protein_coding
ENSG00000091656.19	693.691	0.419614	0.162439	2.5832	0.00978872	0.0317712	ZFHX4	protein_coding
ENSG00000091664.9	1.74657	0.242947	0.447021	0.54348	0.586799	0.732056	SLC17A6	protein_coding
ENSG00000206072.13	5.26882	-1.80131	0.404704	-4.45094	8.54966e-06	7.11864e-05	SERPINB11	protein_coding
ENSG00000091732.17	691.056	-0.153095	0.0472991	-3.23674	0.00120905	0.00540174	ZC3HC1	protein_coding
ENSG00000217236.2	8.99982	-1.79716	0.44202	-4.0658	4.7869e-05	0.000330231	SP9	protein_coding
ENSG00000091844.8	141.424	-0.43022	0.0996124	-4.31893	1.56785e-05	0.000122229	RGS17	protein_coding
ENSG00000091879.14	1021.22	-0.211172	0.0981693	-2.1511	0.0314683	0.0831047	ANGPT2	protein_coding
ENSG00000091947.10	1185.17	-0.159711	0.0539954	-2.95787	0.00309771	0.0120853	TMEM101	protein_coding
ENSG00000091972.18	654.883	0.651877	0.0915306	7.12196	1.06404e-12	2.98174e-11	CD200	protein_coding
ENSG00000092009.10	20.521	0.852311	0.236933	3.59726	0.000321587	0.00173042	CMA1	protein_coding
ENSG00000092010.15	10159.6	0.264592	0.0684167	3.86736	0.000110019	0.000681719	PSME1	protein_coding
ENSG00000092020.10	745.094	0.000875595	0.0411968	0.0212539	0.983043	0.991382	PPP2R3C	protein_coding
ENSG00000092036.18	475.471	-0.0207955	0.0616446	-0.337345	0.735857	0.840881	HAUS4	protein_coding
ENSG00000092051.17	42.8288	0.817251	0.127894	6.39005	1.65834e-10	3.52088e-09	JPH4	protein_coding
ENSG00000092054.13	12.1726	0.689652	0.199823	3.45131	0.000557876	0.00278536	MYH7	protein_coding
ENSG00000170516.17	12.5803	-1.7917	0.441461	-4.05856	4.93758e-05	0.000339437	COX7B2	protein_coding
ENSG00000092068.20	3203.55	-0.123173	0.118436	-1.04	0.298338	0.464507	SLC7A8	protein_coding
ENSG00000092094.11	1349.81	-0.137836	0.0475376	-2.89951	0.00373748	0.0141581	OSGEP	protein_coding
ENSG00000092096.18	695.841	0.470701	0.137511	3.423	0.000619346	0.00304392	SLC22A17	protein_coding
ENSG00000092098.17	48.6146	-0.027016	0.0760367	-0.355302	0.722364	0.832071	RNF31	protein_coding
ENSG00000092108.22	3002.78	-0.161796	0.0459573	-3.52057	0.000430624	0.00223007	SCFD1	protein_coding
ENSG00000092140.16	1531.87	-0.215721	0.0570111	-3.78385	0.000154424	0.000918183	G2E3	protein_coding
ENSG00000092148.13	8408.94	-0.0825942	0.0515852	-1.60112	0.10935	0.221518	HECTD1	protein_coding
ENSG00000092199.18	18087.9	-0.0743382	0.0391451	-1.89904	0.057559	0.134535	HNRNPC	protein_coding
ENSG00000092200.12	44.4409	0.132426	0.102956	1.28624	0.198359	0.346965	RPGRIP1	protein_coding
ENSG00000092201.10	7552.19	-0.0593777	0.0511908	-1.15993	0.246077	0.405348	SUPT16H	protein_coding
ENSG00000092203.15	3727.24	0.00468954	0.0380786	0.123154	0.901985	0.946579	TOX4	protein_coding
ENSG00000092208.17	400.403	-0.17668	0.0524159	-3.37073	0.000749698	0.00357507	GEMIN2	protein_coding
ENSG00000212900.3	1.53966	-1.79115	0.46488	-3.85292	0.000116716	0.000718368	KRTAP3-2	protein_coding
ENSG00000092330.18	2252.14	0.210458	0.0436033	4.82665	1.38847e-06	1.41662e-05	TINF2	protein_coding
ENSG00000092345.14	34.717	0.839726	0.169242	4.96168	6.98877e-07	7.60102e-06	DAZL	protein_coding
ENSG00000092377.15	5.62362	-0.744455	0.33144	-2.24612	0.0246961	0.0680999	TBL1Y	protein_coding
ENSG00000092421.17	2278.17	0.0506159	0.146093	0.346463	0.728995	0.836439	SEMA6A	protein_coding
ENSG00000092439.16	3423.46	0.0481213	0.0553173	0.869916	0.384347	0.554444	TRPM7	protein_coding
ENSG00000092445.12	1270.08	-0.165436	0.0891339	-1.85604	0.0634473	0.145313	TYRO3	protein_coding
ENSG00000092470.12	866.544	0.0510181	0.0768862	0.663554	0.506976	0.667236	WDR76	protein_coding
ENSG00000092529.25	149.243	0.31973	0.112036	2.85382	0.00431972	0.0159712	CAPN3	protein_coding
ENSG00000092531.10	867.126	0.103641	0.0419729	2.46923	0.0135403	0.041547	SNAP23	protein_coding
ENSG00000092607.15	79.8813	-0.583184	0.152997	-3.81173	0.000138	0.000830971	TBX15	protein_coding
ENSG00000092621.13	2380.94	-0.225962	0.150562	-1.50079	0.13341	0.258011	PHGDH	protein_coding
ENSG00000198573.7	0.85332	-1.78845	0.561241	-3.18661	0.00143952	0.00627277	SPANXC	protein_coding
ENSG00000092820.18	31104	-0.200106	0.0829712	-2.41175	0.015876	0.0473242	EZR	protein_coding
ENSG00000092841.19	20462.4	-0.108717	0.0682821	-1.59217	0.111347	0.224537	MYL6	protein_coding
ENSG00000092847.13	4140.43	-0.027713	0.0525141	-0.527725	0.59769	0.740838	AGO1	protein_coding
ENSG00000092850.12	24.175	-0.446977	0.185768	-2.40611	0.0161236	0.0479604	TEKT2	protein_coding
ENSG00000092853.14	1287.94	-0.187729	0.0851201	-2.20545	0.0274222	0.0742228	CLSPN	protein_coding
ENSG00000092871.17	1535.47	-0.0218968	0.0554848	-0.394644	0.693106	0.812606	RFFL	protein_coding
ENSG00000092929.12	3758.88	-0.175896	0.120305	-1.46209	0.143718	0.273	UNC13D	protein_coding
ENSG00000092931.11	1376.02	-0.0498644	0.0469342	-1.06243	0.288039	0.453157	MFSD11	protein_coding
ENSG00000092964.18	7051.27	0.116625	0.0822283	1.41831	0.1561	0.290732	DPYSL2	protein_coding
ENSG00000092969.12	615.463	0.0968668	0.128776	0.752213	0.451923	0.619225	TGFB2	protein_coding
ENSG00000092978.11	1115.47	-0.207071	0.0426331	-4.85704	1.19153e-06	1.23075e-05	GPATCH2	protein_coding
ENSG00000093000.19	4891.3	-0.0204216	0.0518246	-0.394051	0.693543	0.812975	NUP50	protein_coding
ENSG00000093009.11	890.014	-0.19071	0.0928452	-2.05407	0.0399692	0.100805	CDC45	protein_coding
ENSG00000093010.15	5228.07	-0.131592	0.0657515	-2.00136	0.045354	0.111422	COMT	protein_coding
ENSG00000186081.12	954.998	-1.78106	0.322567	-5.52151	3.36095e-08	4.89451e-07	KRT5	protein_coding
ENSG00000093134.15	142.148	-0.458553	0.209822	-2.18544	0.0288565	0.0774375	VNN3	protein_coding
ENSG00000093144.19	2926.22	-0.086278	0.0534611	-1.61385	0.106561	0.217213	ECHDC1	protein_coding
ENSG00000093167.18	2546.09	-0.0648804	0.0430134	-1.50838	0.131458	0.255149	LRRFIP2	protein_coding
ENSG00000093183.14	1726.83	0.0709727	0.0456609	1.55434	0.120103	0.238067	SEC22C	protein_coding
ENSG00000093217.11	869.21	-0.295962	0.0726923	-4.07144	4.67232e-05	0.000323505	XYLB	protein_coding
ENSG00000094631.21	2654.08	-0.108649	0.0529319	-2.05262	0.0401099	0.10103	HDAC6	protein_coding
ENSG00000094661.3	8.68722	-0.145309	0.189477	-0.766898	0.443142	0.610679	OR1I1	protein_coding
ENSG00000094755.17	6759.61	0.390368	0.251328	1.55322	0.12037	0.238481	GABRP	protein_coding
ENSG00000273706.5	34.4054	-1.77789	0.280675	-6.33434	2.38359e-10	4.97631e-09	LHX1	protein_coding
ENSG00000094804.12	2565.82	-0.881334	0.126671	-6.95764	3.46022e-12	9.18396e-11	CDC6	protein_coding
ENSG00000094841.14	624.985	-0.025423	0.0581691	-0.437054	0.662072	0.790233	UPRT	protein_coding
ENSG00000094880.11	2049.76	0.016308	0.0449208	0.363039	0.716576	0.828289	CDC23	protein_coding
ENSG00000094914.14	2600.71	-0.113654	0.0492142	-2.30937	0.0209229	0.0594411	AAAS	protein_coding
ENSG00000094916.16	8292.66	-0.0841947	0.0718508	-1.1718	0.241278	0.399811	CBX5	protein_coding
ENSG00000094963.14	823.466	0.467281	0.186469	2.50594	0.0122125	0.0381266	FMO2	protein_coding
ENSG00000094975.14	3241.2	-0.293552	0.0605593	-4.84735	1.25121e-06	1.28672e-05	SUCO	protein_coding
ENSG00000095002.15	2078.33	-0.156279	0.0637991	-2.44954	0.0143037	0.0434667	MSH2	protein_coding
ENSG00000095015.6	2725.88	0.373929	0.0641288	5.83091	5.51257e-09	9.28028e-08	MAP3K1	protein_coding
ENSG00000095059.16	76.0432	-0.145734	0.0828851	-1.75826	0.0787032	0.172371	DHPS	protein_coding
ENSG00000095066.12	2182.26	-0.285378	0.0573885	-4.97274	6.60123e-07	7.23459e-06	HOOK2	protein_coding
ENSG00000095110.8	21.8409	0.539112	0.274502	1.96396	0.0495343	0.119537	NXPE1	protein_coding
ENSG00000095139.14	14486.3	-0.128625	0.0464023	-2.77194	0.00557227	0.0198021	ARCN1	protein_coding
ENSG00000095203.14	2796.96	-0.631044	0.102863	-6.13482	8.52579e-10	1.64718e-08	EPB41L4B	protein_coding
ENSG00000095209.12	1418.88	-0.350759	0.0822731	-4.26336	2.01378e-05	0.000152799	TMEM38B	protein_coding
ENSG00000095261.14	3454.33	-0.199008	0.0493993	-4.02857	5.61174e-05	0.000379525	PSMD5	protein_coding
ENSG00000095303.17	1838.13	0.48114	0.113672	4.23269	2.30915e-05	0.000172793	PTGS1	protein_coding
ENSG00000095319.14	7078.08	-0.1404	0.0585261	-2.39893	0.0164432	0.0487316	NUP188	protein_coding
ENSG00000095321.17	4004.65	-0.354173	0.0989024	-3.58104	0.000342235	0.00182833	CRAT	protein_coding
ENSG00000095370.20	1059.57	0.938421	0.0776134	12.091	1.17901e-33	1.04912e-31	SH2D3C	protein_coding
ENSG00000095380.11	2838.74	-0.0348648	0.0750722	-0.464417	0.642349	0.775556	NANS	protein_coding
ENSG00000095383.20	1515.35	0.0602367	0.0882813	0.682327	0.495032	0.65668	TBC1D2	protein_coding
ENSG00000095397.16	637.25	-0.0319313	0.11324	-0.28198	0.777959	0.868679	WHRN	protein_coding
ENSG00000095464.10	25.0535	-0.0322858	0.116449	-0.277253	0.781586	0.870989	PDE6C	protein_coding
ENSG00000095485.18	1076	0.00702179	0.0419016	0.167578	0.866915	0.925241	CWF19L1	protein_coding
ENSG00000095539.15	3227.33	-0.167077	0.105837	-1.57863	0.114422	0.229441	SEMA4G	protein_coding
ENSG00000095564.14	2931.18	0.231272	0.0625009	3.7003	0.000215346	0.0012235	BTAF1	protein_coding
ENSG00000095574.12	1350.82	-0.0516743	0.0490341	-1.05384	0.291954	0.457516	IKZF5	protein_coding
ENSG00000095585.17	1465.29	0.216549	0.109461	1.97833	0.047892	0.11635	BLNK	protein_coding
ENSG00000095587.9	163.162	-0.225597	0.143374	-1.57349	0.115606	0.231043	TLL2	protein_coding
ENSG00000095596.12	5.23276	-0.0331295	0.222399	-0.148964	0.881582	0.934188	CYP26A1	protein_coding
ENSG00000095637.22	9810.51	0.650337	0.176166	3.69161	0.000222835	0.00125893	SORBS1	protein_coding
ENSG00000095713.14	92.883	0.853672	0.216761	3.9383	8.20596e-05	0.000529156	CRTAC1	protein_coding
ENSG00000095739.11	1711.96	-0.615077	0.187373	-3.28263	0.00102843	0.00470717	BAMBI	protein_coding
ENSG00000095752.7	432.693	-0.225175	0.204699	-1.10003	0.271319	0.434478	IL11	protein_coding
[truncated: 17,963 more rows]
