# Supplementary material for: Comprehensive bioinformatics analysis and experimental validation revealed that high-expression ARHGAP9 affected the progression of gastric cancer
Source: Research Square preprint supplement (doi:10.21203/rs.3.rs-7311091/v1), 2025-12-05
Supplement: Supplementary file 4 [file 8037e01243fffae70d5b8718.xlsx]

## Sheet: Sheet1
Drug	p.value	method
Camptothecin	1.03083e-16	Wilcoxon test
Vinblastine	1.08831e-07	Wilcoxon test
Cisplatin	5.6443e-14	Wilcoxon test
Cytarabine	3.50683e-06	Wilcoxon test
Docetaxel	0.0824827	Wilcoxon test
Gefitinib	0.820978	Wilcoxon test
Navitoclax	1.5109e-05	Wilcoxon test
Vorinostat	0.0165416	Wilcoxon test
Nilotinib	3.40802e-09	Wilcoxon test
Olaparib	5.83981e-20	Wilcoxon test
Axitinib	6.76974e-14	Wilcoxon test
AZD7762	3.90238e-08	Wilcoxon test
SB216763	9.93265e-31	Wilcoxon test
KU-55933	8.23083e-20	Wilcoxon test
Afatinib	0.18617	Wilcoxon test
Staurosporine	9.25189e-12	Wilcoxon test
PLX-4720	2.40021e-16	Wilcoxon test
NU7441	1.32741e-17	Wilcoxon test
Doramapimod	6.8797e-15	Wilcoxon test
Wee1 Inhibitor	5.84435e-06	Wilcoxon test
Nutlin-3a (-)	6.84289e-18	Wilcoxon test
Mirin	2.39667e-13	Wilcoxon test
PD173074	3.85e-13	Wilcoxon test
ZM447439	7.09024e-15	Wilcoxon test
Alisertib	5.66425e-16	Wilcoxon test
RO-3306	6.39509e-06	Wilcoxon test
MK-2206	7.35044e-10	Wilcoxon test
Palbociclib	4.72313e-06	Wilcoxon test
Dactolisib	5.01141e-09	Wilcoxon test
Pictilisib	4.75955e-09	Wilcoxon test
AZD8055	4.0536e-29	Wilcoxon test
PD0325901	0.0754977	Wilcoxon test
Obatoclax Mesylate	1.6687e-12	Wilcoxon test
5-Fluorouracil	4.64715e-05	Wilcoxon test
Dasatinib	1.33238e-19	Wilcoxon test
Paclitaxel	0.12282	Wilcoxon test
Crizotinib	6.71979e-05	Wilcoxon test
Rapamycin	5.00077e-11	Wilcoxon test
Sorafenib	5.6184e-09	Wilcoxon test
BI-2536	1.04467e-17	Wilcoxon test
Irinotecan	5.68556e-14	Wilcoxon test
Oxaliplatin	1.15268e-07	Wilcoxon test
BMS-536924	3.26393e-08	Wilcoxon test
GSK1904529A	0.00355621	Wilcoxon test
Tozasertib	6.39509e-06	Wilcoxon test
PF-4708671	2.66052e-16	Wilcoxon test
PRIMA-1MET	1.70968e-24	Wilcoxon test
Erlotinib	0.197521	Wilcoxon test
Niraparib	5.84495e-22	Wilcoxon test
MK-1775	0.00139744	Wilcoxon test
Dinaciclib	2.49046e-09	Wilcoxon test
Gemcitabine	3.10244e-15	Wilcoxon test
Bortezomib	2.80263e-12	Wilcoxon test
GSK269962A	8.74822e-21	Wilcoxon test
SB505124	2.18836e-11	Wilcoxon test
Tamoxifen	6.08632e-06	Wilcoxon test
Fulvestrant	1.63472e-12	Wilcoxon test
EPZ004777	1.13036e-18	Wilcoxon test
YK-4-279	3.10819e-08	Wilcoxon test
Daporinad	0.00408876	Wilcoxon test
BMS-345541	0.00915114	Wilcoxon test
AZ960	2.91306e-32	Wilcoxon test
Talazoparib	2.53805e-14	Wilcoxon test
XAV939	3.08803e-20	Wilcoxon test
Trametinib	0.073637	Wilcoxon test
Dabrafenib	2.09932e-07	Wilcoxon test
Temozolomide	5.20214e-15	Wilcoxon test
AZD5438	1.54986e-07	Wilcoxon test
IAP_5620	3.55747e-07	Wilcoxon test
AZD2014	1.59463e-09	Wilcoxon test
AZD1208	1.91482e-15	Wilcoxon test
AZD1332	2.68165e-16	Wilcoxon test
Ruxolitinib	2.08122e-18	Wilcoxon test
Linsitinib	0.410659	Wilcoxon test
Epirubicin	9.15048e-18	Wilcoxon test
Cyclophosphamide	3.90451e-12	Wilcoxon test
Pevonedistat	6.54035e-06	Wilcoxon test
Sapitinib	0.0419789	Wilcoxon test
Uprosertib	2.01377e-06	Wilcoxon test
LCL161	6.69288e-05	Wilcoxon test
Lapatinib	3.25802e-05	Wilcoxon test
Luminespib	1.53745e-11	Wilcoxon test
Alpelisib	2.24356e-07	Wilcoxon test
Taselisib	5.33688e-09	Wilcoxon test
EPZ5676	7.25229e-15	Wilcoxon test
SCH772984	0.0192074	Wilcoxon test
IWP-2	9.2919e-19	Wilcoxon test
Leflunomide	1.96648e-12	Student's t-test
Entinostat	4.04378e-06	Wilcoxon test
OSI-027	0.457087	Wilcoxon test
LGK974	1.81845e-07	Wilcoxon test
VE-822	9.80545e-06	Wilcoxon test
WZ4003	1.72656e-24	Wilcoxon test
CZC24832	2.4883e-33	Wilcoxon test
AZD5582	2.74997e-07	Wilcoxon test
GSK2606414	5.4154e-24	Wilcoxon test
PFI3	3.80483e-21	Wilcoxon test
PCI-34051	4.80369e-23	Wilcoxon test
Wnt-C59	1.83672e-09	Wilcoxon test
I-BET-762	3.29327e-16	Wilcoxon test
RVX-208	2.71108e-26	Wilcoxon test
OTX015	9.81626e-13	Wilcoxon test
GSK343	7.93389e-22	Wilcoxon test
ML323	0.0313322	Wilcoxon test
Entospletinib	4.14173e-29	Wilcoxon test
PRT062607	1.86983e-28	Wilcoxon test
Ribociclib	3.95458e-39	Wilcoxon test
AGI-6780	3.85491e-07	Wilcoxon test
Picolinici-acid	1.39472e-17	Wilcoxon test
AZD5153	1.71418e-14	Wilcoxon test
CDK9_5576	1.30413e-09	Wilcoxon test
CDK9_5038	1.10417e-14	Wilcoxon test
Eg5_9814	1.02471e-05	Wilcoxon test
ERK_2440	0.17867	Wilcoxon test
ERK_6604	0.511214	Wilcoxon test
IRAK4_4710	1.39226e-08	Wilcoxon test
JAK1_8709	8.66976e-21	Wilcoxon test
AZD5991	2.68022e-06	Wilcoxon test
PAK_5339	4.9578e-16	Wilcoxon test
TAF1_5496	0.621291	Wilcoxon test
ULK1_4989	0.00164115	Wilcoxon test
VSP34_8731	0.96694	Wilcoxon test
Selumetinib	0.605899	Wilcoxon test
IGF1R_3801	2.00054e-10	Wilcoxon test
JAK_8517	9.89585e-20	Wilcoxon test
AZD4547	3.54863e-10	Wilcoxon test
Ibrutinib	0.0607149	Wilcoxon test
Zoledronate	8.77894e-17	Wilcoxon test
Acetalax	0.00458221	Wilcoxon test
Oxaliplatin.1	3.13657e-07	Wilcoxon test
Carmustine	3.50799e-09	Wilcoxon test
Topotecan	3.87463e-21	Wilcoxon test
Teniposide	1.07487e-22	Wilcoxon test
Mitoxantrone	4.87454e-25	Wilcoxon test
Dactinomycin	3.0579e-08	Wilcoxon test
Fludarabine	1.67863e-16	Wilcoxon test
Nelarabine	2.28867e-14	Wilcoxon test
Fulvestrant.1	5.35993e-05	Wilcoxon test
Vincristine	6.03213e-13	Wilcoxon test
Docetaxel.1	1.96684e-06	Wilcoxon test
Podophyllotoxin bromide	1.85474e-13	Wilcoxon test
Dihydrorotenone	0.193573	Wilcoxon test
Gallibiscoquinazole	5.4447e-08	Wilcoxon test
Elephantin	1.64982e-10	Wilcoxon test
Sinularin	0.00245819	Wilcoxon test
Sabutoclax	1.68094e-10	Wilcoxon test
LY2109761	6.09737e-15	Wilcoxon test
OF-1	0.0288028	Wilcoxon test
MN-64	5.11542e-10	Wilcoxon test
KRAS (G12C) Inhibitor-12	0.000283804	Wilcoxon test
MG-132	8.54075e-07	Wilcoxon test
BDP-00009066	0.000108097	Wilcoxon test
Buparlisib	1.32103e-12	Wilcoxon test
Ulixertinib	0.310012	Wilcoxon test
Venetoclax	5.59282e-23	Wilcoxon test
ABT737	8.89688e-06	Wilcoxon test
Dactinomycin.1	3.7373e-08	Wilcoxon test
Afuresertib	0.000129277	Wilcoxon test
AGI-5198	1.3249e-13	Wilcoxon test
AZD3759	0.0101097	Wilcoxon test
AZD5363	2.5308e-10	Wilcoxon test
AZD6738	6.5335e-05	Wilcoxon test
AZD8186	1.22112e-23	Wilcoxon test
Osimertinib	0.191297	Wilcoxon test
Cediranib	1.54826e-09	Wilcoxon test
Ipatasertib	0.00337593	Wilcoxon test
GDC0810	0.000983438	Wilcoxon test
GNE-317	1.10412e-12	Wilcoxon test
GSK2578215A	3.75756e-08	Wilcoxon test
I-BRD9	2.64058e-07	Wilcoxon test
Telomerase Inhibitor IX	1.55789e-07	Wilcoxon test
MIRA-1	2.46022e-11	Wilcoxon test
NVP-ADW742	1.30367e-05	Wilcoxon test
P22077	1.03377e-05	Wilcoxon test
Savolitinib	2.76903e-06	Wilcoxon test
UMI-77	2.12037e-05	Wilcoxon test
WIKI4	2.36259e-06	Wilcoxon test
Sepantronium bromide	0.777559	Wilcoxon test
MIM1	8.26797e-11	Wilcoxon test
WEHI-539	1.85731e-08	Wilcoxon test
BPD-00008900	8.16396e-11	Wilcoxon test
Foretinib	5.84292e-12	Wilcoxon test
BIBR-1532	1.02479e-10	Wilcoxon test
Pyridostatin	1.97084e-09	Wilcoxon test
AMG-319	4.96028e-32	Wilcoxon test
MK-8776	3.04992e-13	Wilcoxon test
Ulixertinib.1	0.255076	Wilcoxon test
Vinorelbine	9.41006e-09	Wilcoxon test
VX-11e	0.265974	Wilcoxon test
Uprosertib.1	0.0704711	Wilcoxon test
LJI308	2.18247e-20	Wilcoxon test
AZ6102	6.15989e-13	Wilcoxon test
GSK591	6.97476e-09	Wilcoxon test
VE821	1.59866e-07	Wilcoxon test
AZD6482	1.55895e-19	Wilcoxon test
AT13148	2.26426e-08	Wilcoxon test
BMS-754807	3.74091e-24	Wilcoxon test
JQ1	1.19779e-23	Wilcoxon test
