# Supplementary material for: Comprehensive bioinformatics analysis and experimental validation revealed that high-expression ARHGAP9 affected the progression of gastric cancer
Source: Research Square preprint supplement (doi:10.21203/rs.3.rs-7311091/v1), 2025-12-05
Supplement: Supplementary file 5 [file 9da2b6daca02120e0d78e99e.xlsx]

## Sheet: Sheet1
id	baseMean	log2FoldChange	lfcSE	stat	pvalue	padj	gene_name	gene_type
ENSG00000203785.9	155.224	-4.22889	0.53444	-7.91275	2.51758e-15	8.93187e-14	SPRR2E	protein_coding
ENSG00000185269.12	1909.66	-3.60136	0.259038	-13.9028	6.08749e-44	8.46195e-42	NOTUM	protein_coding
ENSG00000196805.7	4.98588	-3.31966	0.793761	-4.18219	2.88718e-05	0.000210727	SPRR2B	protein_coding
ENSG00000186847.6	453.463	-3.2978	0.314014	-10.5021	8.44799e-26	5.52804e-24	KRT14	protein_coding
ENSG00000204542.3	61.5188	-3.28173	0.34972	-9.3839	6.35785e-21	3.23534e-19	C6orf15	protein_coding
ENSG00000167754.13	51.6277	-3.17118	0.347003	-9.13878	6.31608e-20	3.05007e-18	KLK5	protein_coding
ENSG00000087128.10	44.1305	-2.96523	0.316672	-9.36374	7.69634e-21	3.90838e-19	TMPRSS11E	protein_coding
ENSG00000163631.17	406.699	-2.91332	0.322966	-9.02051	1.87218e-19	8.7823e-18	ALB	protein_coding
ENSG00000143556.9	933.547	-2.87221	0.390828	-7.34904	1.99637e-13	6.00474e-12	S100A7	protein_coding
ENSG00000212901.4	17.152	-2.85942	0.424556	-6.73509	1.63834e-11	4.01092e-10	KRTAP3-1	protein_coding
ENSG00000143954.13	60.7581	-2.84351	0.36899	-7.70621	1.29613e-14	4.34764e-13	REG3G	protein_coding
ENSG00000188508.11	31.1009	-2.82748	0.338348	-8.35673	6.44819e-17	2.5651e-15	KRTDAP	protein_coding
ENSG00000078898.7	32.3272	-2.63661	0.378139	-6.97258	3.11174e-12	8.31582e-11	BPIFB2	protein_coding
ENSG00000140519.14	317.959	-2.59748	0.259882	-9.99486	1.60519e-23	9.2927e-22	RHCG	protein_coding
ENSG00000237412.7	11.1756	-2.56537	0.303209	-8.46073	2.65715e-17	1.08689e-15	PRSS56	protein_coding
ENSG00000178372.8	22.6888	-2.55254	0.375228	-6.80265	1.02713e-11	2.57368e-10	CALML5	protein_coding
ENSG00000092758.18	1107.2	-2.5315	0.216988	-11.6666	1.88882e-31	1.55167e-29	COL9A3	protein_coding
ENSG00000186895.4	14.9029	-2.41595	0.308503	-7.83121	4.83205e-15	1.67802e-13	FGF3	protein_coding
ENSG00000131686.15	19.8006	-2.37974	0.273936	-8.68721	3.71458e-18	1.59919e-16	CA6	protein_coding
ENSG00000153802.12	29.9786	-2.369	0.285713	-8.29154	1.11789e-16	4.36928e-15	TMPRSS11D	protein_coding
ENSG00000133636.11	214.123	-2.34435	0.265315	-8.83609	9.91263e-19	4.46277e-17	NTS	protein_coding
ENSG00000185966.4	3.15388	-2.27554	0.568946	-3.99957	6.34569e-05	0.000422592	LCE3E	protein_coding
ENSG00000169550.14	89.9011	-2.25977	0.376861	-5.99628	2.01892e-09	3.65516e-08	MUC15	protein_coding
ENSG00000091704.10	38.5354	-2.24672	0.316153	-7.10643	1.19081e-12	3.32939e-11	CPA1	protein_coding
ENSG00000136694.9	8.22629	-2.232	0.436265	-5.11614	3.11845e-07	3.69231e-06	IL36A	protein_coding
ENSG00000108244.17	1496.61	-2.1959	0.259812	-8.45189	2.8662e-17	1.16948e-15	KRT23	protein_coding
ENSG00000205420.11	2077.42	-2.19442	0.329358	-6.66274	2.68775e-11	6.40789e-10	KRT6A	protein_coding
ENSG00000123584.7	7.1081	-2.1899	0.525017	-4.17111	3.03115e-05	0.000219866	MAGEA9	protein_coding
ENSG00000124935.4	1.51621	-2.18107	0.46547	-4.68573	2.78959e-06	2.651e-05	SCGB1D2	protein_coding
ENSG00000187054.16	17.0759	-2.15085	0.332883	-6.46128	1.03819e-10	2.28579e-09	TMPRSS11A	protein_coding
ENSG00000184330.12	23.0984	-2.13513	0.393086	-5.43171	5.58178e-08	7.77877e-07	S100A7A	protein_coding
ENSG00000113430.10	14.7158	-2.12313	0.284678	-7.45799	8.78513e-14	2.73261e-12	IRX4	protein_coding
ENSG00000244094.2	20.7438	-2.11539	0.398581	-5.3073	1.11261e-07	1.45609e-06	SPRR2F	protein_coding
ENSG00000170465.10	240.658	-2.10958	0.415999	-5.07111	3.95493e-07	4.58132e-06	KRT6C	protein_coding
ENSG00000162040.7	18.7867	-2.10252	0.263834	-7.96907	1.59867e-15	5.80572e-14	HS3ST6	protein_coding
ENSG00000159516.9	7.41992	-2.09813	0.419259	-5.00437	5.60442e-07	6.26351e-06	SPRR2G	protein_coding
ENSG00000141741.12	6519.41	-2.08138	0.157984	-13.1746	1.22919e-39	1.4505e-37	MIEN1	protein_coding
ENSG00000204983.14	883.723	-2.07097	0.27789	-7.45247	9.16089e-14	2.84409e-12	PRSS1	protein_coding
ENSG00000141579.7	215.404	-2.06842	0.237488	-8.70955	3.05078e-18	1.32618e-16	ZNF750	protein_coding
ENSG00000089199.10	378.149	-2.05234	0.252384	-8.1318	4.22953e-16	1.59484e-14	CHGB	protein_coding
ENSG00000147381.11	600.963	-2.0498	0.515461	-3.97664	6.9896e-05	0.000459941	MAGEA4	protein_coding
ENSG00000170890.14	31.7815	-2.04045	0.242682	-8.40791	4.1737e-17	1.68068e-15	PLA2G1B	protein_coding
ENSG00000135222.6	2.68034	-2.03249	0.53854	-3.77407	0.000160603	0.000951019	CSN2	protein_coding
ENSG00000204889.10	23.0755	-2.01315	0.290943	-6.9194	4.53553e-12	1.18589e-10	KRT40	protein_coding
ENSG00000115844.11	23.4105	-2.009	0.211721	-9.48891	2.33463e-21	1.21569e-19	DLX2	protein_coding
ENSG00000275896.6	3107.61	-1.99924	0.28741	-6.95606	3.49928e-12	9.26764e-11	PRSS2	protein_coding
ENSG00000181433.9	69.6035	-1.99034	0.384206	-5.18039	2.21423e-07	2.70837e-06	SAGE1	protein_coding
ENSG00000141736.14	38420	-1.94635	0.165392	-11.7681	5.69996e-32	4.77826e-30	ERBB2	protein_coding
ENSG00000183128.7	41.0002	-1.94495	0.248555	-7.82502	5.07568e-15	1.76138e-13	CALHM3	protein_coding
ENSG00000151655.19	162.145	-1.93935	0.226405	-8.56587	1.07265e-17	4.48074e-16	ITIH2	protein_coding
ENSG00000189001.11	74.8281	-1.93501	0.322591	-5.99835	1.99333e-09	3.61414e-08	SBSN	protein_coding
ENSG00000141738.14	8335.81	-1.93075	0.172087	-11.2196	3.26574e-29	2.46096e-27	GRB7	protein_coding
ENSG00000205116.3	9.79671	-1.90772	0.24111	-7.91222	2.52837e-15	8.96367e-14	TMEM88B	protein_coding
ENSG00000131050.11	41.066	-1.90682	0.287315	-6.63669	3.20815e-11	7.59706e-10	BPIFA2	protein_coding
ENSG00000203783.5	5.26699	-1.90095	0.491497	-3.86768	0.000109874	0.000680969	PRR9	protein_coding
ENSG00000168928.13	13.2028	-1.89845	0.289399	-6.55995	5.38259e-11	1.22794e-09	CTRB2	protein_coding
ENSG00000136695.15	17.647	-1.89292	0.329077	-5.75222	8.80812e-09	1.41969e-07	IL36RN	protein_coding
ENSG00000188293.6	19.9319	-1.88405	0.311123	-6.05565	1.39848e-09	2.60668e-08	IGFL1	protein_coding
ENSG00000130720.13	564.818	-1.88077	0.24854	-7.56726	3.8119e-14	1.22759e-12	FIBCD1	protein_coding
ENSG00000016602.9	92.2575	-1.86426	0.270109	-6.90186	5.1327e-12	1.33142e-10	CLCA4	protein_coding
ENSG00000137975.8	72.2977	-1.85967	0.276408	-6.728	1.72012e-11	4.20275e-10	CLCA2	protein_coding
ENSG00000163202.5	7.73062	-1.85426	0.52024	-3.56424	0.000364914	0.00193419	LCE3D	protein_coding
ENSG00000198092.6	6.03391	-1.83888	0.38159	-4.81898	1.44292e-06	1.467e-05	TMPRSS11F	protein_coding
ENSG00000269586.7	15.5473	-1.83066	0.611472	-2.99385	0.00275477	0.0109223	CT45A10	protein_coding
ENSG00000188100.9	0.921376	-1.82406	0.538268	-3.38875	0.000702129	0.00337604	FAM25A	protein_coding
ENSG00000134216.19	12.1513	-1.81674	0.419045	-4.33544	1.45471e-05	0.00011446	CHIA	protein_coding
ENSG00000170523.3	7.64841	-1.81327	0.295906	-6.12786	8.90702e-10	1.71679e-08	KRT83	protein_coding
ENSG00000196754.13	682.323	-1.81148	0.212678	-8.51748	1.63057e-17	6.74827e-16	S100A2	protein_coding
ENSG00000175121.11	8.78071	-1.8111	0.271436	-6.67228	2.51867e-11	6.03109e-10	WFDC5	protein_coding
ENSG00000081277.13	536.138	-1.81025	0.251566	-7.19592	6.20412e-13	1.77702e-11	PKP1	protein_coding
ENSG00000206072.13	5.26882	-1.80131	0.404704	-4.45094	8.54966e-06	7.11864e-05	SERPINB11	protein_coding
ENSG00000217236.2	8.99982	-1.79716	0.44202	-4.0658	4.7869e-05	0.000330231	SP9	protein_coding
ENSG00000170516.17	12.5803	-1.7917	0.441461	-4.05856	4.93758e-05	0.000339437	COX7B2	protein_coding
ENSG00000212900.3	1.53966	-1.79115	0.46488	-3.85292	0.000116716	0.000718368	KRTAP3-2	protein_coding
ENSG00000198573.7	0.85332	-1.78845	0.561241	-3.18661	0.00143952	0.00627277	SPANXC	protein_coding
ENSG00000186081.12	954.998	-1.78106	0.322567	-5.52151	3.36095e-08	4.89451e-07	KRT5	protein_coding
ENSG00000273706.5	34.4054	-1.77789	0.280675	-6.33434	2.38359e-10	4.97631e-09	LHX1	protein_coding
ENSG00000241186.10	212.571	-1.77142	0.227981	-7.77005	7.84572e-15	2.67811e-13	TDGF1	protein_coding
ENSG00000101188.5	359.116	-1.73829	0.224453	-7.74458	9.58984e-15	3.23438e-13	NTSR1	protein_coding
ENSG00000170835.16	1075.25	-1.73821	0.270438	-6.4274	1.29809e-10	2.81766e-09	CEL	protein_coding
ENSG00000011677.13	257.416	-1.71425	0.327719	-5.23086	1.68723e-07	2.12178e-06	GABRA3	protein_coding
ENSG00000156076.10	41.5028	-1.69966	0.307241	-5.532	3.16595e-08	4.62729e-07	WIF1	protein_coding
ENSG00000214897.5	4.53013	-1.69788	0.355075	-4.78175	1.73776e-06	1.73698e-05	PNMA6E	protein_coding
ENSG00000185940.10	14.1769	-1.69634	0.259018	-6.54912	5.78776e-11	1.31367e-09	KRTAP5-5	protein_coding
ENSG00000169840.5	1.95402	-1.69564	0.417195	-4.06437	4.81616e-05	0.000331878	GSX1	protein_coding
ENSG00000102195.10	3.08697	-1.68998	0.365931	-4.61831	3.86877e-06	3.53659e-05	GPR50	protein_coding
ENSG00000227234.2	2.42904	-1.68077	0.460612	-3.64899	0.000263276	0.00145549	SPANXB1	protein_coding
ENSG00000184735.7	13.2372	-1.6784	0.374549	-4.48112	7.42511e-06	6.28008e-05	DDX53	protein_coding
ENSG00000204544.5	161.072	-1.67318	0.387182	-4.32144	1.55012e-05	0.00012104	MUC21	protein_coding
ENSG00000150201.15	84.7675	-1.66991	0.213747	-7.81255	5.60407e-15	1.93655e-13	FXYD4	protein_coding
ENSG00000148795.7	31.9241	-1.66895	0.286538	-5.82453	5.72745e-09	9.59605e-08	CYP17A1	protein_coding
ENSG00000123576.5	3.05465	-1.66738	0.427103	-3.90394	9.46395e-05	0.000598281	ESX1	protein_coding
ENSG00000145920.15	92.9259	-1.65993	0.235323	-7.05386	1.74027e-12	4.77875e-11	CPLX2	protein_coding
ENSG00000161395.14	4198.11	-1.64999	0.146244	-11.2824	1.60248e-29	1.21877e-27	PGAP3	protein_coding
ENSG00000101144.13	1333.25	-1.64874	0.196315	-8.39847	4.52335e-17	1.8185e-15	BMP7	protein_coding
ENSG00000154227.13	22.2783	-1.63687	0.235689	-6.94506	3.78299e-12	1.00083e-10	CERS3	protein_coding
ENSG00000137392.10	12.4702	-1.63269	0.286447	-5.69981	1.19939e-08	1.88863e-07	CLPS	protein_coding
ENSG00000148123.15	54.9324	-1.62851	0.228262	-7.1344	9.72076e-13	2.73765e-11	PLPPR1	protein_coding
ENSG00000269855.2	15.1669	-1.62705	0.246784	-6.59301	4.30988e-11	1.00085e-09	RNF225	protein_coding
ENSG00000154162.15	30.8841	-1.62418	0.293804	-5.52811	3.23702e-08	4.72242e-07	CDH12	protein_coding
ENSG00000163534.15	214.105	3.75921	0.221694	16.9567	1.71699e-64	5.74759e-62	FCRL1	protein_coding
ENSG00000170054.16	33.4758	3.72567	0.279504	13.3296	1.55789e-40	1.88819e-38	SERPINA9	protein_coding
ENSG00000156738.18	1351.75	3.64607	0.212582	17.1514	6.13627e-66	2.34072e-63	MS4A1	protein_coding
ENSG00000100721.11	193.537	3.62566	0.242801	14.9326	2.02165e-50	3.52771e-48	TCL1A	protein_coding
ENSG00000104921.15	183.294	3.60377	0.21157	17.0335	4.63482e-65	1.65268e-62	FCER2	protein_coding
ENSG00000160683.5	32.7844	3.59179	0.206199	17.4191	5.91335e-68	2.50848e-65	CXCR5	protein_coding
ENSG00000117215.15	447.996	3.18677	0.168162	18.9506	4.3661e-80	3.83656e-77	PLA2G2D	protein_coding
ENSG00000131203.13	3237.19	3.17511	0.197189	16.1019	2.47439e-58	6.1807e-56	IDO1	protein_coding
ENSG00000132185.18	275.281	3.12016	0.181635	17.1782	3.86624e-66	1.48633e-63	FCRLA	protein_coding
ENSG00000012124.17	805.557	3.11283	0.174672	17.821	4.85353e-71	2.3415e-68	CD22	protein_coding
ENSG00000117322.18	1648.89	3.05484	0.230595	13.2476	4.65621e-40	5.57476e-38	CR2	protein_coding
ENSG00000174123.11	278.382	3.00509	0.163635	18.3645	2.52536e-75	1.57301e-72	TLR10	protein_coding
ENSG00000167483.19	202.574	2.8982	0.184566	15.7028	1.44787e-55	3.12486e-53	NIBAN3	protein_coding
ENSG00000160856.21	315.035	2.8725	0.152585	18.8255	4.66833e-79	3.58936e-76	FCRL3	protein_coding
ENSG00000128218.8	195.779	2.76934	0.188993	14.6531	1.28627e-48	2.07524e-46	VPREB3	protein_coding
ENSG00000105369.10	2551.95	2.75222	0.173668	15.8476	1.46157e-56	3.31433e-54	CD79A	protein_coding
ENSG00000188822.8	119.492	2.74189	0.178791	15.3357	4.41518e-53	8.45378e-51	CNR2	protein_coding
ENSG00000187912.12	112.372	2.72567	0.176262	15.4637	6.09579e-54	1.20466e-51	CLEC17A	protein_coding
ENSG00000132704.16	149.26	2.70016	0.170291	15.8562	1.2744e-56	2.91677e-54	FCRL2	protein_coding
ENSG00000156234.7	1980.55	2.69614	0.162332	16.6089	6.01178e-62	1.79289e-59	CXCL13	protein_coding
ENSG00000181617.6	903.394	2.68488	0.259866	10.3318	5.06145e-25	3.19722e-23	FDCSP	protein_coding
ENSG00000136573.14	253.521	2.65094	0.19458	13.6239	2.88632e-42	3.73764e-40	BLK	protein_coding
ENSG00000007312.13	187.199	2.58675	0.145134	17.8232	4.67218e-71	2.27632e-68	CD79B	protein_coding
ENSG00000177455.15	296.875	2.58514	0.157212	16.4437	9.3034e-61	2.57192e-58	CD19	protein_coding
ENSG00000172724.12	841.368	2.57938	0.19944	12.9331	2.92839e-38	3.2455e-36	CCL19	protein_coding
ENSG00000240505.9	100.757	2.5516	0.17422	14.6458	1.43286e-48	2.29669e-46	TNFRSF13B	protein_coding
ENSG00000035720.8	110.901	2.48922	0.155191	16.0398	6.74061e-58	1.64204e-55	STAP1	protein_coding
ENSG00000269404.7	620.126	2.4832	0.204962	12.1154	8.75118e-34	7.84386e-32	SPIB	protein_coding
ENSG00000181092.10	31.2804	2.46662	0.3363	7.33457	2.22434e-13	6.64977e-12	ADIPOQ	protein_coding
ENSG00000113088.6	119.17	2.46289	0.136706	18.016	1.45945e-72	7.80616e-70	GZMK	protein_coding
ENSG00000174255.8	14.4119	2.45028	0.142951	17.1407	7.36994e-66	2.7684e-63	ZNF80	protein_coding
ENSG00000186265.10	99.253	2.44977	0.128294	19.095	2.78045e-81	2.73641e-78	BTLA	protein_coding
ENSG00000138755.6	7426.28	2.44246	0.159241	15.3381	4.2565e-53	8.18179e-51	CXCL9	protein_coding
ENSG00000187862.12	24.2276	2.4341	0.139551	17.4424	3.93024e-68	1.69649e-65	TTC24	protein_coding
ENSG00000105205.7	67.3569	2.42901	0.265386	9.15275	5.55003e-20	2.6907e-18	CLC	protein_coding
ENSG00000176083.18	249.733	2.41427	0.157127	15.365	2.80833e-53	5.41931e-51	ZNF683	protein_coding
ENSG00000154451.14	2445	2.40685	0.142213	16.9242	2.98375e-64	9.85397e-62	GBP5	protein_coding
ENSG00000181036.14	92.8741	2.37692	0.1204	19.7419	9.42496e-87	1.3251e-83	FCRL6	protein_coding
ENSG00000126353.3	539.819	2.35603	0.139388	16.9027	4.29574e-64	1.39069e-61	CCR7	protein_coding
ENSG00000138684.9	22.5578	2.35363	0.160523	14.6623	1.12461e-48	1.82039e-46	IL21	protein_coding
ENSG00000139193.4	334.58	2.3172	0.127788	18.1332	1.74424e-73	1.00977e-70	CD27	protein_coding
ENSG00000203710.12	421.619	2.29933	0.133747	17.1916	3.06976e-66	1.18942e-63	CR1	protein_coding
ENSG00000109943.9	90.1197	2.29146	0.117366	19.5241	6.85632e-85	8.43465e-82	CRTAM	protein_coding
ENSG00000122224.18	302.297	2.28765	0.11974	19.1052	2.28546e-81	2.29516e-78	LY9	protein_coding
ENSG00000128815.19	1263.9	2.27752	0.120407	18.9151	8.56171e-80	7.26388e-77	WDFY4	protein_coding
ENSG00000177272.9	200.335	2.27346	0.126158	18.0206	1.34168e-72	7.25509e-70	KCNA3	protein_coding
ENSG00000128322.7	37.1097	2.26217	0.196946	11.4863	1.54658e-30	1.21572e-28	IGLL1	protein_coding
ENSG00000255833.2	59.329	2.25937	0.12334	18.3183	5.91169e-75	3.63628e-72	TIFAB	protein_coding
ENSG00000078589.13	411.536	2.24682	0.106397	21.1172	5.52605e-99	1.94233e-95	P2RY10	protein_coding
ENSG00000163519.14	148.546	2.235	0.117864	18.9625	3.48134e-80	3.11472e-77	TRAT1	protein_coding
ENSG00000124203.6	225.482	2.23351	0.117582	18.9953	1.86684e-80	1.70117e-77	ZNF831	protein_coding
ENSG00000104814.13	637.869	2.21279	0.105385	20.9972	6.95346e-98	2.13854e-94	MAP4K1	protein_coding
ENSG00000239961.3	34.3661	2.20033	0.167114	13.1666	1.36564e-39	1.60767e-37	LILRA4	protein_coding
ENSG00000163518.11	33.5273	2.1916	0.181919	12.0471	2.00977e-33	1.77552e-31	FCRL4	protein_coding
ENSG00000153563.16	1151.51	2.18695	0.119036	18.3722	2.19246e-75	1.38316e-72	CD8A	protein_coding
ENSG00000184293.7	50.4136	2.17332	0.127605	17.0317	4.782e-65	1.6929e-62	CLECL1	protein_coding
ENSG00000111537.5	55.2712	2.17155	0.167475	12.9664	1.89756e-38	2.11735e-36	IFNG	protein_coding
ENSG00000159958.7	422.678	2.17068	0.14985	14.4857	1.49211e-47	2.33091e-45	TNFRSF13C	protein_coding
ENSG00000175857.8	226.134	2.15565	0.142145	15.1652	6.013e-52	1.12079e-49	GAPT	protein_coding
ENSG00000161405.17	2848.7	2.15234	0.127201	16.9208	3.16172e-64	1.03721e-61	IKZF3	protein_coding
ENSG00000204252.14	2032.77	2.14512	0.127843	16.7794	3.45538e-63	1.06938e-60	HLA-DOA	protein_coding
ENSG00000169245.6	2921.84	2.14344	0.16881	12.6973	6.11722e-37	6.33718e-35	CXCL10	protein_coding
ENSG00000145850.9	39.6211	2.13863	0.172409	12.4044	2.47327e-35	2.38169e-33	TIMD4	protein_coding
ENSG00000137078.9	295.362	2.1365	0.116648	18.3157	6.19767e-75	3.76512e-72	SIT1	protein_coding
ENSG00000122122.10	1198.63	2.13618	0.0936204	22.8175	3.07489e-115	3.78273e-111	SASH3	protein_coding
ENSG00000104894.12	2219.46	2.13483	0.113431	18.8206	5.12222e-79	3.87776e-76	CD37	protein_coding
ENSG00000103522.16	286.016	2.13385	0.101087	21.1089	6.58241e-99	2.15938e-95	IL21R	protein_coding
ENSG00000081237.20	4683.77	2.12106	0.0978485	21.677	3.38008e-104	2.77212e-100	PTPRC	protein_coding
ENSG00000113263.13	565.318	2.11221	0.105829	19.9587	1.2596e-88	1.99943e-85	ITK	protein_coding
ENSG00000009790.15	395.882	2.09351	0.0911056	22.979	7.56461e-117	1.2408e-112	TRAF3IP3	protein_coding
ENSG00000169248.13	1234.16	2.09017	0.180259	11.5953	4.35125e-31	3.50436e-29	CXCL11	protein_coding
ENSG00000188011.5	10.3924	2.0826	0.162665	12.803	1.5767e-37	1.69033e-35	RTP5	protein_coding
ENSG00000137265.15	607.387	2.07735	0.120754	17.2033	2.51029e-66	9.80366e-64	IRF4	protein_coding
ENSG00000183918.17	209.563	2.07672	0.106148	19.5643	3.11456e-85	3.92978e-82	SH2D1A	protein_coding
ENSG00000184811.4	18.8836	2.07639	0.25746	8.06491	7.32921e-16	2.70966e-14	TRARG1	protein_coding
ENSG00000101916.12	295.115	2.06973	0.12714	16.2791	1.38795e-59	3.63289e-57	TLR8	protein_coding
ENSG00000162894.12	942.71	2.06671	0.121993	16.9412	2.23511e-64	7.43145e-62	FCMR	protein_coding
ENSG00000112273.7	1.78421	2.06579	0.490353	4.21287	2.52147e-05	0.000186919	HDGFL1	protein_coding
ENSG00000185811.19	1558.36	2.06516	0.0964662	21.4081	1.12226e-101	6.13604e-98	IKZF1	protein_coding
ENSG00000175463.12	552.556	2.05885	0.0956459	21.5258	8.92879e-103	6.27668e-99	TBC1D10C	protein_coding
ENSG00000166428.14	339.294	2.05546	0.151692	13.5503	7.89577e-42	9.98804e-40	PLD4	protein_coding
ENSG00000121807.6	185.376	2.054	0.118715	17.3019	4.55191e-67	1.86659e-64	CCR2	protein_coding
ENSG00000188820.13	110.465	2.05352	0.135182	15.1907	4.07397e-52	7.62251e-50	CALHM6	protein_coding
ENSG00000204475.10	45.0254	2.04407	0.131455	15.5496	1.60133e-54	3.26964e-52	NCR3	protein_coding
ENSG00000182183.15	110.967	2.03854	0.14277	14.2785	2.97781e-46	4.46744e-44	SHISAL2A	protein_coding
ENSG00000197057.10	101.201	2.03505	0.128116	15.8844	8.12231e-57	1.87894e-54	DTHD1	protein_coding
ENSG00000169313.10	44.2636	2.03106	0.145104	13.9973	1.61986e-44	2.28396e-42	P2RY12	protein_coding
ENSG00000164326.5	81.1245	2.02615	0.344797	5.87637	4.19364e-09	7.23057e-08	CARTPT	protein_coding
ENSG00000005844.19	1741.46	2.02303	0.0862259	23.462	9.98204e-122	2.45598e-117	ITGAL	protein_coding
ENSG00000162739.14	544.19	2.01882	0.107013	18.8652	2.20348e-79	1.83778e-76	SLAMF6	protein_coding
ENSG00000168081.9	55.689	2.01184	0.153782	13.0823	4.15406e-39	4.77601e-37	PNOC	protein_coding
ENSG00000163564.15	215.644	2.01107	0.104268	19.2874	6.85274e-83	7.33064e-80	PYHIN1	protein_coding
ENSG00000117091.10	534.232	2.00744	0.106701	18.8138	5.82268e-79	4.34125e-76	CD48	protein_coding
ENSG00000183542.5	7.80547	2.0065	0.164797	12.1756	4.19429e-34	3.80798e-32	KLRC4	protein_coding
ENSG00000158517.15	344.248	2.00431	0.102112	19.6285	8.82699e-86	1.17394e-82	NCF1	protein_coding
ENSG00000026751.17	1867.66	2.00165	0.113541	17.6294	1.46641e-69	6.50084e-67	SLAMF7	protein_coding
ENSG00000172673.11	230.452	1.99683	0.115575	17.2774	6.96484e-67	2.78639e-64	THEMIS	protein_coding
ENSG00000089012.14	310.868	1.99354	0.110093	18.1077	2.76858e-73	1.54814e-70	SIRPG	protein_coding
ENSG00000105374.10	943.829	1.98522	0.123156	16.1196	1.85891e-58	4.69093e-56	NKG7	protein_coding
ENSG00000172349.17	920.174	1.98253	0.0929031	21.3398	4.8534e-101	2.38826e-97	IL16	protein_coding
