# Supplementary material for: Comprehensive bioinformatics analysis and experimental validation revealed that high-expression ARHGAP9 affected the progression of gastric cancer
Source: Research Square preprint supplement (doi:10.21203/rs.3.rs-7311091/v1), 2025-12-05
Supplement: Supplementary file 6 [file b33f211aaa26ef46ac625c1d.xlsx]

## Sheet: SheetName
symbol	drug	cor	fdr	entrez
ARHGAP9	16-beta-bromoandrosterone	-0.190473	2.6024e-05	64333
ARHGAP9	1S,3R-RSL-3	-0.337222	9.89489e-20	64333
ARHGAP9	3-Cl-AHPC	-0.345538	2.87491e-21	64333
ARHGAP9	968	-0.0113668	0.99849	64333
ARHGAP9	A-804598	0.0423622	0.803843	64333
ARHGAP9	AA-COCF3	-0.207099	3.18512e-07	64333
ARHGAP9	ABT-199	-0.271538	1.31293e-07	64333
ARHGAP9	ABT-737	-0.256901	2.72313e-10	64333
ARHGAP9	AC55649	-0.0643669	0.577204	64333
ARHGAP9	AGK-2	0.00485471	0.992803	64333
ARHGAP9	AM-580	-0.150714	0.0011406	64333
ARHGAP9	AT-406	-0.10273	0.265411	64333
ARHGAP9	AT13387	-0.372334	1.44996e-11	64333
ARHGAP9	AT7867	-0.297486	4.30666e-15	64333
ARHGAP9	AZ-3146	-0.250015	1.36457e-10	64333
ARHGAP9	AZD1480	-0.214464	0.000686541	64333
ARHGAP9	AZD4547	-0.140409	0.00115682	64333
ARHGAP9	AZD6482	-0.0937058	0.0678409	64333
ARHGAP9	AZD7545	-0.190454	2.82604e-06	64333
ARHGAP9	AZD7762	-0.356913	1.24226e-22	64333
ARHGAP9	AZD8055	-0.261318	1.60877e-11	64333
ARHGAP9	B02	-0.314716	1.85477e-16	64333
ARHGAP9	BCL-LZH-4	0.09269	0.59759	64333
ARHGAP9	BEC	-0.0792353	0.999979	64333
ARHGAP9	BI-2536	-0.428761	5.803e-35	64333
ARHGAP9	BIBR-1532	-0.149773	0.000394248	64333
ARHGAP9	BIRB-796	-0.219439	1.60418e-07	64333
ARHGAP9	BIX-01294	-0.311811	3.10564e-17	64333
ARHGAP9	BMS-195614	-0.0892447	0.113529	64333
ARHGAP9	BMS-270394	-0.165138	8.1923e-05	64333
ARHGAP9	BMS-345541	-0.34045	7.21001e-20	64333
ARHGAP9	BMS-536924	-0.119377	0.0113178	64333
ARHGAP9	BMS-754807	-0.157131	0.00012293	64333
ARHGAP9	BRD-A02303741	-0.132628	0.00692286	64333
ARHGAP9	BRD-A05715709	0.121563	0.411928	64333
ARHGAP9	BRD-A71883111	-0.180677	8.08207e-06	64333
ARHGAP9	BRD-A86708339	-0.310839	2.85893e-08	64333
ARHGAP9	BRD-A94377914	-0.423049	9.72122e-17	64333
ARHGAP9	BRD-K01737880	-0.44635	0.00809846	64333
ARHGAP9	BRD-K02251932	-0.128475	0.00614782	64333
ARHGAP9	BRD-K02492147	0.108253	0.0497774	64333
ARHGAP9	BRD-K04800985	-0.0122856	0.999785	64333
ARHGAP9	BRD-K09344309	0.128836	0.764082	64333
ARHGAP9	BRD-K09587429	0.0748836	0.227482	64333
ARHGAP9	BRD-K11533227	-0.236547	9.05289e-09	64333
ARHGAP9	BRD-K13999467	-0.242451	1.74785e-09	64333
ARHGAP9	BRD-K14844214	-0.0785095	0.218613	64333
ARHGAP9	BRD-K16147474	0.0129622	0.98291	64333
ARHGAP9	BRD-K17060750	0.118249	0.01088	64333
ARHGAP9	BRD-K19103580	-0.131765	0.00362784	64333
ARHGAP9	BRD-K24690302	-0.152268	0.000170492	64333
ARHGAP9	BRD-K26531177	-0.335796	2.64569e-18	64333
ARHGAP9	BRD-K27224038	-0.141857	0.486244	64333
ARHGAP9	BRD-K27986637	-0.169521	0.211188	64333
ARHGAP9	BRD-K28456706	-0.236002	1.79618e-09	64333
ARHGAP9	BRD-K29086754	-0.139381	0.410164	64333
ARHGAP9	BRD-K29313308	-0.195964	1.0925e-06	64333
ARHGAP9	BRD-K30019337	-0.0589583	0.85075	64333
ARHGAP9	BRD-K30748066	-0.417744	0.0084521	64333
ARHGAP9	BRD-K33199242	-0.0322826	0.963835	64333
ARHGAP9	BRD-K33514849	-0.00546829	0.999309	64333
ARHGAP9	BRD-K34099515	-0.00330983	0.996826	64333
ARHGAP9	BRD-K34222889	-0.417057	9.69574e-32	64333
ARHGAP9	BRD-K34485477	-0.0345207	0.998562	64333
ARHGAP9	BRD-K35604418	-0.303709	7.78765e-16	64333
ARHGAP9	BRD-K37390332	-0.0586722	0.734034	64333
ARHGAP9	BRD-K41334119	-0.0515643	0.941877	64333
ARHGAP9	BRD-K41597374	-0.225008	3.61541e-09	64333
ARHGAP9	BRD-K42260513	-0.0357984	0.994633	64333
ARHGAP9	BRD-K44224150	-0.130969	0.939908	64333
ARHGAP9	BRD-K45681478	-0.148612	0.000412024	64333
ARHGAP9	BRD-K48334597	-0.257778	0.0107612	64333
ARHGAP9	BRD-K48477130	0.0980721	0.602652	64333
ARHGAP9	BRD-K49290616	-0.0391754	0.936981	64333
ARHGAP9	BRD-K50799972	-0.0749318	0.250425	64333
ARHGAP9	BRD-K51490254	-0.225997	2.71332e-08	64333
ARHGAP9	BRD-K51831558	-0.194837	0.00351522	64333
ARHGAP9	BRD-K52037352	-0.084974	0.162848	64333
ARHGAP9	BRD-K55116708	-0.222816	9.77345e-08	64333
ARHGAP9	BRD-K61166597	-0.385655	1.4259e-24	64333
ARHGAP9	BRD-K63431240	-0.224274	1.97899e-08	64333
ARHGAP9	BRD-K64610608	0.0902615	0.388857	64333
ARHGAP9	BRD-K66453893	-0.402072	2.98502e-29	64333
ARHGAP9	BRD-K66532283	-0.357332	8.07084e-21	64333
ARHGAP9	BRD-K70511574	-0.40022	4.85555e-29	64333
ARHGAP9	BRD-K71781559	0.0147662	0.996572	64333
ARHGAP9	BRD-K75293299	0.00539066	0.988419	64333
ARHGAP9	BRD-K78574327	0.0208356	0.988458	64333
ARHGAP9	BRD-K80183349	-0.308352	1.50052e-16	64333
ARHGAP9	BRD-K84807411	-0.0768112	0.781194	64333
ARHGAP9	BRD-K85133207	-0.184139	1.0575e-05	64333
ARHGAP9	BRD-K86535717	0.0324708	0.940279	64333
ARHGAP9	BRD-K88742110	-0.207834	1.42152e-07	64333
ARHGAP9	BRD-K90370028	-0.0304164	0.955042	64333
ARHGAP9	BRD-K92856060	-0.310196	8.63224e-16	64333
ARHGAP9	BRD-K96431673	-0.000250962	0.999703	64333
ARHGAP9	BRD-K96970199	-0.0244604	0.998764	64333
ARHGAP9	BRD-K97651142	-0.23803	1.85913e-09	64333
ARHGAP9	BRD-K99006945	0.167623	0.0150039	64333
ARHGAP9	BRD-M00053801	-0.0194225	0.880492	64333
ARHGAP9	BRD1378	-0.055654	0.585322	64333
ARHGAP9	BRD1812	-0.264115	3.61802e-12	64333
ARHGAP9	BRD1835	-0.146834	0.00100754	64333
ARHGAP9	BRD4132	-0.0956154	0.106834	64333
ARHGAP9	BRD5468	-0.0727811	0.329021	64333
ARHGAP9	BRD6340	-0.285312	1.1927e-13	64333
ARHGAP9	BRD8899	0.0282193	0.818956	64333
ARHGAP9	BRD8958	-0.010721	0.989112	64333
ARHGAP9	BRD9647	-0.179539	6.8867e-05	64333
ARHGAP9	BRD9876	-0.103759	0.0685556	64333
ARHGAP9	BYL-719	-0.00481388	0.96176	64333
ARHGAP9	Bax channel blocker	-0.221999	7.1178e-08	64333
ARHGAP9	C6-ceramide	0.0115657	0.942623	64333
ARHGAP9	CAL-101	-0.0878309	0.0980828	64333
ARHGAP9	CAY10576	0.0600168	0.400657	64333
ARHGAP9	CAY10594	-0.111273	0.0362058	64333
ARHGAP9	CAY10618	-0.308466	6.65587e-17	64333
ARHGAP9	CBB-1007	0.0502253	0.781869	64333
ARHGAP9	CCT036477	-0.34141	1.15103e-20	64333
ARHGAP9	CD-1530	-0.149293	0.00260786	64333
ARHGAP9	CD-437	-0.38632	6.33518e-27	64333
ARHGAP9	CHIR-99021	-0.255459	1.08874e-10	64333
ARHGAP9	CHM-1	-0.383783	6.45478e-27	64333
ARHGAP9	CI-976	0.0382966	0.80537	64333
ARHGAP9	CID-5951923	0.0547265	0.517492	64333
ARHGAP9	CIL41	-0.232979	0.000252103	64333
ARHGAP9	CIL55	-0.0259597	0.925331	64333
ARHGAP9	CIL55A	-0.318206	3.15239e-08	64333
ARHGAP9	CIL56	-0.369893	5.98882e-11	64333
ARHGAP9	CIL70	-0.350401	3.46846e-11	64333
ARHGAP9	COL-3	-0.35427	2.12128e-16	64333
ARHGAP9	CR-1-31B	-0.42398	1.49633e-33	64333
ARHGAP9	Ch-55	-0.14224	0.00100621	64333
ARHGAP9	Compound 1541A	-0.115683	0.0302258	64333
ARHGAP9	Compound 23 citrate	-0.342693	2.9348e-20	64333
ARHGAP9	Compound 7d-cis	-0.283433	2.80704e-12	64333
ARHGAP9	DBeQ	-0.198348	1.1152e-06	64333
ARHGAP9	DNMDP	-0.00738617	0.939232	64333
ARHGAP9	ELCPK	-0.325739	3.87326e-09	64333
ARHGAP9	ETP-46464	-0.186765	0.000152841	64333
ARHGAP9	EX-527	0.0208255	0.886819	64333
ARHGAP9	FGIN-1-27	0.0870272	0.499251	64333
ARHGAP9	FQI-1	-0.33186	1.47625e-10	64333
ARHGAP9	FQI-2	-0.336771	5.36295e-21	64333
ARHGAP9	FSC231	-0.0238844	0.99945	64333
ARHGAP9	GANT-61	-0.129124	0.0120477	64333
ARHGAP9	GDC-0879	0.0293217	0.638526	64333
ARHGAP9	GDC-0941	-0.115002	0.00700773	64333
ARHGAP9	GMX-1778	-0.256977	1.64203e-11	64333
ARHGAP9	GSK-3 inhibitor IX	-0.255497	3.07877e-10	64333
ARHGAP9	GSK-J4	-0.34413	0.0179335	64333
ARHGAP9	GSK1059615	-0.0110868	0.978617	64333
ARHGAP9	GSK2636771	0.0466582	0.642214	64333
ARHGAP9	GSK4112	-0.166571	0.000154718	64333
ARHGAP9	GSK461364	-0.447834	1.22323e-36	64333
ARHGAP9	GSK525762A	-0.377187	1.06409e-25	64333
ARHGAP9	GW-405833	-0.328877	2.9558e-19	64333
ARHGAP9	GW-843682X	-0.297166	9.29187e-15	64333
ARHGAP9	HBX-41108	-0.155598	0.00218624	64333
ARHGAP9	HC-067047	-0.108754	0.0450448	64333
ARHGAP9	HLI 373	-0.240632	6.84228e-10	64333
ARHGAP9	I-BET151	-0.395623	8.07449e-29	64333
ARHGAP9	IC-87114	-0.0318367	0.672077	64333
ARHGAP9	IPR-456	0.0206973	0.914845	64333
ARHGAP9	ISOX	-0.384178	1.3834e-26	64333
ARHGAP9	IU1	-0.0987248	0.216878	64333
ARHGAP9	JQ-1	-0.378924	3.21241e-26	64333
ARHGAP9	JW-480	-0.0410531	0.824263	64333
ARHGAP9	JW-55	0.178837	0.133224	64333
ARHGAP9	JW-74	-0.0921112	0.236437	64333
ARHGAP9	KH-CB19	0.0934467	0.390204	64333
ARHGAP9	KHS101	-0.237837	2.47254e-09	64333
ARHGAP9	KPT185	-0.410163	9.97438e-23	64333
ARHGAP9	KU 0060648	-0.227252	3.18186e-09	64333
ARHGAP9	KU-0063794	-0.248384	3.42136e-10	64333
ARHGAP9	KU-55933	-0.247635	2.37685e-09	64333
ARHGAP9	KU-60019	-0.295859	2.50194e-15	64333
ARHGAP9	KW-2449	-0.346499	7.50125e-22	64333
ARHGAP9	KX2-391	-0.392686	8.75275e-28	64333
ARHGAP9	Ki8751	-0.193774	1.60823e-06	64333
ARHGAP9	Ko-143	-0.261061	7.40617e-12	64333
ARHGAP9	L-685458	-0.0820514	0.135679	64333
ARHGAP9	LE-135	-0.220999	1.1927e-07	64333
ARHGAP9	LRRK2-IN-1	-0.409628	6.91112e-22	64333
ARHGAP9	LY-2157299	0.0303621	0.918239	64333
ARHGAP9	LY-2183240	-0.473409	3.92049e-42	64333
ARHGAP9	MG-132	-0.227813	0.00173015	64333
ARHGAP9	MGCD-265	-0.303767	3.99716e-16	64333
ARHGAP9	MI-1	0.0611742	0.434881	64333
ARHGAP9	MI-2	-0.210956	0.000692345	64333
ARHGAP9	MK-0752	0.0768496	0.263185	64333
ARHGAP9	MK-1775	-0.368038	1.07677e-23	64333
ARHGAP9	MK-2206	-0.1936	2.32896e-06	64333
ARHGAP9	ML006	-0.144916	0.00475636	64333
ARHGAP9	ML029	-0.168042	5.1265e-05	64333
ARHGAP9	ML031	-0.307659	6.13107e-14	64333
ARHGAP9	ML050	-0.17456	1.5716e-05	64333
ARHGAP9	ML083	-0.00586124	0.973358	64333
ARHGAP9	ML162	-0.29237	1.13764e-14	64333
ARHGAP9	ML203	-0.137292	0.00664554	64333
ARHGAP9	ML210	-0.354748	3.53395e-21	64333
ARHGAP9	ML239	-0.245287	2.46778e-10	64333
ARHGAP9	ML258	-0.0559541	0.587414	64333
ARHGAP9	ML311	-0.37619	2.85931e-26	64333
ARHGAP9	ML312	0.0340093	0.989758	64333
ARHGAP9	ML320	-0.21428	4.57127e-07	64333
ARHGAP9	ML334 diastereomer	0.174055	0.0066324	64333
ARHGAP9	MLN2238	-0.322604	7.4999e-18	64333
ARHGAP9	MLN2480	-0.0715255	0.473915	64333
ARHGAP9	MST-312	-0.323056	2.50061e-18	64333
ARHGAP9	Mdivi-1	-0.228157	8.15347e-09	64333
ARHGAP9	Merck60	-0.418916	7.62781e-32	64333
ARHGAP9	N9-isopropylolomoucine	-0.258179	3.24158e-11	64333
ARHGAP9	NPC-26	-0.0496427	0.642679	64333
ARHGAP9	NSC 74859	-0.15154	0.00146662	64333
ARHGAP9	NSC19630	-0.277205	8.37863e-10	64333
ARHGAP9	NSC23766	-0.298805	6.18229e-15	64333
ARHGAP9	NSC30930	0.0766711	0.240412	64333
ARHGAP9	NSC48300	-0.374575	7.98739e-25	64333
ARHGAP9	NSC632839	-0.368992	1.97841e-24	64333
ARHGAP9	NSC95397	-0.446217	9.41659e-32	64333
ARHGAP9	NVP-231	-0.315649	8.09739e-18	64333
ARHGAP9	NVP-ADW742	-0.201005	7.02381e-07	64333
ARHGAP9	NVP-BEZ235	-0.192389	5.3327e-05	64333
ARHGAP9	NVP-BSK805	-0.297712	2.20767e-15	64333
ARHGAP9	NVP-TAE684	-0.178494	2.1646e-05	64333
ARHGAP9	O-6-benzylguanine	-0.132166	0.241355	64333
ARHGAP9	OSI-027	-0.223728	1.80304e-08	64333
ARHGAP9	OSI-930	-0.344769	4.62981e-17	64333
ARHGAP9	PAC-1	-0.294823	6.10356e-15	64333
ARHGAP9	PD 153035	0.0474142	0.446929	64333
ARHGAP9	PD318088	0.0605216	0.205675	64333
ARHGAP9	PDMP	-0.217097	5.86327e-08	64333
ARHGAP9	PF-184	-0.381889	5.42493e-25	64333
ARHGAP9	PF-3758309	-0.435407	6.41208e-17	64333
ARHGAP9	PF-4800567 hydrochloride	0.0708432	0.999586	64333
ARHGAP9	PF-543	-0.151556	0.000493256	64333
ARHGAP9	PF-573228	-0.275691	1.7334e-13	64333
ARHGAP9	PF-750	-0.171058	0.000107117	64333
ARHGAP9	PHA-793887	-0.419161	2.46457e-32	64333
ARHGAP9	PI-103	-0.241046	4.20206e-10	64333
ARHGAP9	PIK-93	-0.254273	7.33027e-11	64333
ARHGAP9	PL-DI	-0.432812	9.61919e-34	64333
ARHGAP9	PLX-4720	0.0215198	0.810515	64333
ARHGAP9	PRIMA-1	-0.423997	6.11308e-31	64333
ARHGAP9	PRIMA-1-Met	-0.264701	2.6452e-05	64333
ARHGAP9	PRL-3 inhibitor I	0.0357629	0.801094	64333
ARHGAP9	PX-12	-0.452025	2.5671e-37	64333
ARHGAP9	PYR-41	-0.124345	0.0117858	64333
ARHGAP9	QS-11	-0.0994374	0.680146	64333
ARHGAP9	QW-BI-011	-0.325389	6.0093e-05	64333
ARHGAP9	R428	-0.268674	1.04508e-08	64333
ARHGAP9	RAF265	-0.200412	5.2492e-05	64333
ARHGAP9	RG-108	-0.198873	1.01539e-06	64333
ARHGAP9	RITA	-0.228897	4.62722e-09	64333
ARHGAP9	RO4929097	-0.182594	0.0114036	64333
ARHGAP9	Repligen 136	-0.265221	3.30398e-11	64333
ARHGAP9	SB-225002	-0.388499	2.71259e-28	64333
ARHGAP9	SB-431542	-0.00544333	0.974773	64333
ARHGAP9	SB-525334	-0.0139173	0.827289	64333
ARHGAP9	SB-743921	-0.375764	1.63259e-26	64333
ARHGAP9	SCH-529074	-0.109947	0.0142269	64333
ARHGAP9	SCH-79797	-0.265023	8.77839e-13	64333
ARHGAP9	SGX-523	0.0482425	0.422157	64333
ARHGAP9	SID 26681509	-0.217378	2.02167e-07	64333
ARHGAP9	SJ-172550	-0.0850148	0.37097	64333
ARHGAP9	SKI-II	-0.292151	1.02222e-12	64333
ARHGAP9	SMER-3	-0.232798	3.1373e-08	64333
ARHGAP9	SN-38	-0.30117	2.0759e-13	64333
ARHGAP9	SNS-032	-0.284023	3.89273e-13	64333
ARHGAP9	SNX-2112	-0.362687	3.84484e-24	64333
ARHGAP9	SR-II-138A	-0.434867	4.39295e-36	64333
ARHGAP9	SR1001	-0.126514	0.0441925	64333
ARHGAP9	SR8278	-0.0713974	0.850438	64333
ARHGAP9	SRT-1720	-0.249977	1.70481e-09	64333
ARHGAP9	STF-31	-0.30626	5.34014e-16	64333
ARHGAP9	SU11274	-0.25349	4.80989e-11	64333
ARHGAP9	SZ4TA2	0.027636	0.850646	64333
ARHGAP9	StemRegenin 1	-0.273127	7.47804e-13	64333
ARHGAP9	TG-100-115	-0.137314	0.00269297	64333
ARHGAP9	TG-101348	-0.306797	5.95335e-16	64333
ARHGAP9	TGX-221	-0.066242	0.309929	64333
ARHGAP9	TPCA-1	-0.300998	4.59331e-16	64333
ARHGAP9	TW-37	-0.2684	3.69536e-12	64333
ARHGAP9	UNC0321	0.00462602	0.979784	64333
ARHGAP9	UNC0638	-0.229477	6.15165e-09	64333
ARHGAP9	VAF-347	0.197085	0.000566254	64333
ARHGAP9	VER-155008	-0.213987	1.0903e-07	64333
ARHGAP9	VU0155056	-0.0198685	0.968252	64333
ARHGAP9	WAY-362450	-0.020226	0.998521	64333
ARHGAP9	WP1130	-0.343416	1.02761e-19	64333
ARHGAP9	WZ4002	-0.0766273	0.254494	64333
ARHGAP9	WZ8040	-0.108772	0.0227358	64333
ARHGAP9	XL765	-0.124396	0.0132109	64333
ARHGAP9	YK 4-279	-0.348936	2.45089e-22	64333
ARHGAP9	YM-155	-0.212927	9.62082e-07	64333
ARHGAP9	ZSTK474	-0.104049	0.0369384	64333
ARHGAP9	abiraterone	0.25592	0.0298687	64333
ARHGAP9	afatinib	-0.0332846	0.51998	64333
ARHGAP9	alisertib	-0.322747	1.41511e-18	64333
ARHGAP9	alvocidib	-0.404956	4.63091e-14	64333
ARHGAP9	apicidin	-0.398123	2.406e-29	64333
ARHGAP9	austocystin D	0.0807755	0.0808907	64333
ARHGAP9	avicin D	-0.0929755	0.264239	64333
ARHGAP9	avrainvillamide	-0.314328	2.52777e-12	64333
ARHGAP9	axitinib	-0.325037	4.89351e-19	64333
ARHGAP9	azacitidine	-0.15901	0.000574788	64333
ARHGAP9	bafilomycin A1	-0.0458513	0.949901	64333
ARHGAP9	barasertib	-0.32279	1.95476e-18	64333
ARHGAP9	bardoxolone methyl	-0.32418	3.1673e-16	64333
ARHGAP9	belinostat	-0.443481	3.80553e-18	64333
ARHGAP9	bendamustine	-0.239534	4.2906e-09	64333
ARHGAP9	betulinic acid	0.0274877	0.883887	64333
ARHGAP9	bexarotene	-0.225696	5.8166e-08	64333
ARHGAP9	birinapant	-0.0771744	0.191168	64333
ARHGAP9	blebbistatin	-0.0494471	0.950566	64333
ARHGAP9	bleomycin A2	-0.119268	0.014488	64333
ARHGAP9	bortezomib	-0.331008	1.76207e-18	64333
ARHGAP9	bosutinib	-0.222937	1.24711e-08	64333
ARHGAP9	brefeldin A	-0.194309	2.8555e-06	64333
ARHGAP9	brivanib	-0.21803	2.52081e-08	64333
ARHGAP9	cabozantinib	-0.129856	0.00330915	64333
ARHGAP9	canertinib	-0.0882796	0.048342	64333
ARHGAP9	cediranib	-0.061724	0.620409	64333
ARHGAP9	ceranib-2	-0.392044	1.30293e-28	64333
ARHGAP9	cerulenin	-0.346743	2.50227e-21	64333
ARHGAP9	chlorambucil	-0.393234	5.30412e-27	64333
ARHGAP9	ciclopirox	-0.430688	1.65527e-34	64333
ARHGAP9	ciclosporin	-0.141065	0.00376838	64333
ARHGAP9	cimetidine	0.0491883	0.972471	64333
ARHGAP9	clofarabine	-0.395377	5.50325e-29	64333
ARHGAP9	crizotinib	-0.355166	3.46827e-22	64333
ARHGAP9	cucurbitacin I	-0.311385	2.1368e-16	64333
ARHGAP9	curcumin	-0.373152	1.08479e-24	64333
ARHGAP9	cyanoquinoline 11	-0.110424	0.167068	64333
ARHGAP9	cyclophosphamide	0.0241566	0.995903	64333
ARHGAP9	cytarabine hydrochloride	-0.429373	3.34234e-34	64333
ARHGAP9	cytochalasin B	-0.0932997	0.0513784	64333
ARHGAP9	dabrafenib	-0.156766	0.0204587	64333
ARHGAP9	dacarbazine	-0.361384	6.91615e-22	64333
ARHGAP9	daporinad	-0.283664	4.51067e-12	64333
ARHGAP9	darinaparsin	-0.225894	0.000102946	64333
ARHGAP9	dasatinib	-0.0338456	0.517379	64333
ARHGAP9	decitabine	-0.384696	3.23277e-27	64333
ARHGAP9	dexamethasone	-0.215934	1.32266e-07	64333
ARHGAP9	dinaciclib	-0.415598	1.81491e-15	64333
ARHGAP9	docetaxel	-0.368489	2.28201e-11	64333
ARHGAP9	doxorubicin	-0.425775	2.42801e-34	64333
ARHGAP9	elocalcitol	-0.322032	6.45721e-18	64333
ARHGAP9	entinostat	-0.370259	2.27844e-24	64333
ARHGAP9	epigallocatechin-3-monogallate	-0.256055	8.97998e-10	64333
ARHGAP9	erastin	-0.293047	5.46469e-14	64333
ARHGAP9	erismodegib	0.113532	0.0808313	64333
ARHGAP9	erlotinib	0.0693982	0.121711	64333
ARHGAP9	etomoxir	-0.057018	0.948445	64333
ARHGAP9	etoposide	-0.398939	4.25711e-29	64333
ARHGAP9	fingolimod	-0.325068	4.66228e-18	64333
ARHGAP9	fluorouracil	-0.259038	3.71826e-12	64333
ARHGAP9	fluvastatin	-0.0667563	0.194561	64333
ARHGAP9	foretinib	-0.190678	1.35228e-06	64333
ARHGAP9	fulvestrant	-0.08978	0.798353	64333
ARHGAP9	fumonisin B1	-0.0867883	0.0957691	64333
ARHGAP9	gefitinib	0.03306	0.564484	64333
ARHGAP9	gemcitabine	-0.40281	5.20766e-27	64333
ARHGAP9	gossypol	-0.293557	1.66134e-14	64333
ARHGAP9	hyperforin	0.0346594	0.721123	64333
ARHGAP9	ibrutinib	-0.0299218	0.65149	64333
ARHGAP9	ifosfamide	0.127884	0.445205	64333
ARHGAP9	imatinib	-0.256165	3.81892e-10	64333
ARHGAP9	importazole	-0.0944496	0.0961001	64333
ARHGAP9	indisulam	-0.362078	1.79517e-22	64333
ARHGAP9	isoevodiamine	-0.33883	6.58709e-21	64333
ARHGAP9	isoliquiritigenin	-0.434087	5.424e-08	64333
ARHGAP9	isonicotinohydroxamic acid	0.0376443	0.99255	64333
ARHGAP9	istradefylline	-0.0491342	0.77456	64333
ARHGAP9	itraconazole	-0.165463	0.0169609	64333
ARHGAP9	lapatinib	-0.0796963	0.0717627	64333
ARHGAP9	lenvatinib	-0.170708	2.4827e-05	64333
ARHGAP9	leptomycin B	-0.368304	1.71059e-25	64333
ARHGAP9	linifanib	-0.207065	3.3847e-08	64333
ARHGAP9	linsitinib	-0.174278	1.7594e-05	64333
ARHGAP9	lomeguatrib	-0.115238	0.024962	64333
ARHGAP9	lovastatin	-0.0449759	0.399679	64333
ARHGAP9	manumycin A	-0.43664	1.27096e-34	64333
ARHGAP9	marinopyrrole A	-0.284062	2.85018e-09	64333
ARHGAP9	masitinib	-0.273686	2.21335e-12	64333
ARHGAP9	methotrexate	-0.238749	1.63889e-09	64333
ARHGAP9	methylstat	-0.368755	8.7804e-17	64333
ARHGAP9	mitomycin	-0.320457	1.57664e-18	64333
ARHGAP9	momelotinib	-0.302336	6.58908e-15	64333
ARHGAP9	myricetin	-0.0473695	0.66474	64333
ARHGAP9	myriocin	0.143785	0.778878	64333
ARHGAP9	nakiterpiosin	-0.358329	4.12105e-23	64333
ARHGAP9	narciclasine	-0.446186	9.95471e-36	64333
ARHGAP9	navitoclax	-0.232656	2.99545e-09	64333
ARHGAP9	necrostatin-1	-0.23243	2.18345e-07	64333
ARHGAP9	necrostatin-7	-0.165639	8.1153e-05	64333
ARHGAP9	necrosulfonamide	-0.448404	3.2883e-25	64333
ARHGAP9	nelarabine	0.00897511	0.985681	64333
ARHGAP9	neopeltolide	-0.289819	0.000637336	64333
ARHGAP9	neratinib	-0.112089	0.00694349	64333
ARHGAP9	neuronal differentiation inducer III	-0.290659	3.1813e-15	64333
ARHGAP9	niclosamide	-0.166182	3.9919e-05	64333
ARHGAP9	nilotinib	-0.0785939	0.266259	64333
ARHGAP9	nintedanib	-0.117506	0.0147488	64333
ARHGAP9	nutlin-3	-0.268829	1.70466e-12	64333
ARHGAP9	obatoclax	-0.35845	9.71325e-23	64333
ARHGAP9	olaparib	-0.2752	2.30734e-13	64333
ARHGAP9	oligomycin A	-0.247505	1.03781e-10	64333
ARHGAP9	omacetaxine mepesuccinate	-0.361228	3.3718e-17	64333
ARHGAP9	ouabain	-0.359851	2.65205e-23	64333
ARHGAP9	paclitaxel	-0.337118	2.93062e-20	64333
ARHGAP9	palmostatin B	-0.0512566	0.651101	64333
ARHGAP9	pandacostat	-0.182745	7.3061e-05	64333
ARHGAP9	panobinostat	-0.396049	3.84617e-29	64333
ARHGAP9	parbendazole	-0.430302	4.72534e-35	64333
ARHGAP9	parthenolide	-0.0986406	0.0606641	64333
ARHGAP9	pazopanib	-0.296627	3.12303e-15	64333
ARHGAP9	pevonedistat	-0.34705	2.65485e-20	64333
ARHGAP9	phloretin	-0.323222	3.42299e-18	64333
ARHGAP9	pifithrin-alpha	-0.0761001	0.173329	64333
ARHGAP9	pifithrin-mu	-0.312223	7.0374e-17	64333
ARHGAP9	piperlongumine	-0.417488	4.06328e-32	64333
ARHGAP9	pitstop2	-0.014184	0.955847	64333
ARHGAP9	pluripotin	-0.140031	0.00128603	64333
ARHGAP9	procarbazine	0.0237137	0.915556	64333
ARHGAP9	prochlorperazine	-0.164216	8.0448e-05	64333
ARHGAP9	purmorphamine	-0.188577	2.6513e-05	64333
ARHGAP9	pyrazolanthrone	-0.118933	0.00812486	64333
ARHGAP9	quizartinib	-0.101009	0.05923	64333
ARHGAP9	regorafenib	-0.117999	0.0111488	64333
ARHGAP9	rigosertib	-0.407228	4.45571e-29	64333
ARHGAP9	ruxolitinib	-0.219973	1.94386e-08	64333
ARHGAP9	salermide	-0.104257	0.212071	64333
ARHGAP9	saracatinib	0.0464482	0.355951	64333
ARHGAP9	selumetinib	0.0719693	0.132533	64333
ARHGAP9	semagacestat	-0.0109482	0.954031	64333
ARHGAP9	serdemetan	-0.332974	1.75558e-18	64333
ARHGAP9	sildenafil	-0.0846036	0.44946	64333
ARHGAP9	silmitasertib	-0.0809203	0.298833	64333
ARHGAP9	simvastatin	0.0172138	0.809089	64333
ARHGAP9	sirolimus	-0.25637	1.11837e-11	64333
ARHGAP9	sitagliptin	0.0261632	0.997718	64333
ARHGAP9	skepinone-L	-0.262502	7.07373e-06	64333
ARHGAP9	sorafenib	-0.196455	1.67199e-06	64333
ARHGAP9	sotrastaurin	-0.330867	5.136e-14	64333
ARHGAP9	spautin-1	-0.121155	0.00951219	64333
ARHGAP9	staurosporine	-0.120964	0.307052	64333
ARHGAP9	sunitinib	-0.266584	2.28624e-12	64333
ARHGAP9	tacedinaline	-0.361616	7.01647e-17	64333
ARHGAP9	tacrolimus	-0.268502	2.06032e-11	64333
ARHGAP9	tamatinib	-0.0311075	0.730573	64333
ARHGAP9	tamoxifen	-0.0666589	0.287636	64333
ARHGAP9	tandutinib	-0.173638	2.5245e-05	64333
ARHGAP9	tanespimycin	0.000933859	0.990468	64333
ARHGAP9	temozolomide	-0.0578165	0.358044	64333
ARHGAP9	temsirolimus	-0.275707	1.16191e-06	64333
ARHGAP9	teniposide	-0.446865	2.7057e-19	64333
ARHGAP9	thalidomide	-0.0580996	0.774106	64333
ARHGAP9	tigecycline	-0.270454	1.81196e-06	64333
ARHGAP9	tipifarnib-P1	-0.256253	1.46769e-11	64333
ARHGAP9	tipifarnib-P2	-0.354398	4.34518e-12	64333
ARHGAP9	tivantinib	-0.398232	3.17784e-14	64333
ARHGAP9	tivozanib	-0.141097	0.00134741	64333
ARHGAP9	topotecan	-0.383302	2.41435e-27	64333
ARHGAP9	tosedostat	-0.27771	3.26284e-12	64333
ARHGAP9	tozasertib	-0.478475	0.000986051	64333
ARHGAP9	trametinib	0.0509715	0.539375	64333
ARHGAP9	tretinoin	-0.283609	2.09984e-13	64333
ARHGAP9	triazolothiadiazine	-0.434439	6.91933e-36	64333
ARHGAP9	trifluoperazine	-0.138804	0.00241815	64333
ARHGAP9	triptolide	-0.306023	2.91286e-16	64333
ARHGAP9	tubastatin A	-0.328811	5.12107e-09	64333
ARHGAP9	valdecoxib	-0.277868	4.68811e-13	64333
ARHGAP9	vandetanib	0.0915369	0.0540589	64333
ARHGAP9	veliparib	-0.105305	0.124958	64333
ARHGAP9	vemurafenib	0.0416346	0.480155	64333
ARHGAP9	vincristine	-0.441445	6.88077e-38	64333
ARHGAP9	vorapaxar	-0.164943	0.000133158	64333
ARHGAP9	vorinostat	-0.384566	1.26965e-26	64333
ARHGAP9	zebularine	-0.261096	7.60103e-12	64333
