# Supplementary material for: Comprehensive bioinformatics analysis and experimental validation revealed that high-expression ARHGAP9 affected the progression of gastric cancer
Source: Research Square preprint supplement (doi:10.21203/rs.3.rs-7311091/v1), 2025-12-05
Supplement: Supplementary file 7 [file c1b63ba1a528ee73bd81353b.xlsx]

## Sheet: SheetName
symbol	drug	cor	fdr	entrez
ARHGAP9	(5Z)-7-Oxozeaenol	-0.0578093	0.159736	64333
ARHGAP9	17-AAG	0.337123	0	64333
ARHGAP9	5-Fluorouracil	-0.337711	4.56643e-24	64333
ARHGAP9	681640	0.100452	0.0674099	64333
ARHGAP9	A-443654	-0.0303858	0.890063	64333
ARHGAP9	A-770041	0.00360768	0.975475	64333
ARHGAP9	AC220	-0.252815	1.0939e-12	64333
ARHGAP9	AG-014699	0.148909	0.00016295	64333
ARHGAP9	AICAR	-0.293141	3.53571e-16	64333
ARHGAP9	AKT inhibitor VIII	0.149035	0.000243146	64333
ARHGAP9	AMG-706	0.0865667	0.0901357	64333
ARHGAP9	AP-24534	-0.302201	7.26123e-18	64333
ARHGAP9	AR-42	-0.40552	7.9114e-36	64333
ARHGAP9	AS601245	0.059007	0.254048	64333
ARHGAP9	AS605240	-0.235821	7.35349e-11	64333
ARHGAP9	AT-7519	-0.37231	4.49808e-30	64333
ARHGAP9	ATRA	-0.212322	3.54733e-08	64333
ARHGAP9	AUY922	-0.0908485	0.046554	64333
ARHGAP9	AZ628	-0.0871029	0.226316	64333
ARHGAP9	AZD6482	-0.0140969	0.811804	64333
ARHGAP9	AZD7762	-0.287971	1.2777e-15	64333
ARHGAP9	AZD8055	-0.256733	1.80779e-12	64333
ARHGAP9	Afatinib	0.199939	6.28404e-09	64333
ARHGAP9	Axitinib	-0.103534	0.0217403	64333
ARHGAP9	BAY 61-3606	-0.263858	7.36406e-13	64333
ARHGAP9	BEZ235	0.0108488	0.858104	64333
ARHGAP9	BHG712	-0.422739	1.70872e-39	64333
ARHGAP9	BI-2536	-0.0918575	0.328602	64333
ARHGAP9	BIRB 0796	0.161728	0.000371029	64333
ARHGAP9	BIX02189	-0.427662	2.24354e-40	64333
ARHGAP9	BMS-509744	0.0824742	0.349998	64333
ARHGAP9	BMS-536924	-0.0355509	0.623832	64333
ARHGAP9	BMS-708163	0.151761	6.708e-05	64333
ARHGAP9	BMS-754807	0.061666	0.235377	64333
ARHGAP9	BMS345541	-0.368433	2.07135e-29	64333
ARHGAP9	BX-795	-0.172448	9.85201e-06	64333
ARHGAP9	BX-912	-0.436229	1.3458e-42	64333
ARHGAP9	Belinostat	-0.34757	5.24746e-25	64333
ARHGAP9	Bexarotene	0.000922903	0.99247	64333
ARHGAP9	Bicalutamide	0.16026	6.2571e-05	64333
ARHGAP9	Bleomycin	-0.00081086	0.99107	64333
ARHGAP9	Bleomycin (50 uM)	0.200083	8.67042e-09	64333
ARHGAP9	Bortezomib	-0.00207659	0.984473	64333
ARHGAP9	Bosutinib	-0.060796	0.222091	64333
ARHGAP9	Bryostatin 1	0.11331	0.0125764	64333
ARHGAP9	CAL-101	-0.323885	3.60232e-22	64333
ARHGAP9	CAY10603	-0.402353	2.24541e-35	64333
ARHGAP9	CCT007093	0.145787	0.000234679	64333
ARHGAP9	CCT018159	0.0424942	0.415416	64333
ARHGAP9	CEP-701	-0.285853	1.981e-15	64333
ARHGAP9	CGP-082996	0.0436141	0.675482	64333
ARHGAP9	CGP-60474	-0.0239649	0.818218	64333
ARHGAP9	CH5424802	-0.0802724	0.105055	64333
ARHGAP9	CHIR-99021	0.0859366	0.0213695	64333
ARHGAP9	CI-1040	0.00522353	0.92546	64333
ARHGAP9	CMK	-0.031122	0.820457	64333
ARHGAP9	CP466722	-0.408983	6.34068e-37	64333
ARHGAP9	CP724714	0.0784649	0.0962349	64333
ARHGAP9	CUDC-101	-0.369614	6.77617e-29	64333
ARHGAP9	CX-5461	-0.315048	8.20613e-21	64333
ARHGAP9	Camptothecin	-0.163431	2.4325e-05	64333
ARHGAP9	Cetuximab	0.210045	1.41974e-08	64333
ARHGAP9	Cisplatin	0.0763493	0.0991131	64333
ARHGAP9	Crizotinib	-0.00635845	0.980451	64333
ARHGAP9	Cyclopamine	-0.0739164	0.466721	64333
ARHGAP9	Cytarabine	-0.0193231	0.743526	64333
ARHGAP9	DMOG	-0.222423	2.77956e-09	64333
ARHGAP9	Dabrafenib	0.00286713	0.956662	64333
ARHGAP9	Dasatinib	0.0868871	0.18952	64333
ARHGAP9	Docetaxel	0.306221	0	64333
ARHGAP9	Doxorubicin	-0.0497923	0.419999	64333
ARHGAP9	EHT 1864	0.0398688	0.552163	64333
ARHGAP9	EKB-569	-0.256736	3.05415e-13	64333
ARHGAP9	EX-527	0.0451187	0.665779	64333
ARHGAP9	Elesclomol	0.194049	6.30229e-07	64333
ARHGAP9	Embelin	0.0214819	0.761835	64333
ARHGAP9	Epothilone B	0.062225	0.206963	64333
ARHGAP9	Erlotinib	0.183535	0.00474622	64333
ARHGAP9	Etoposide	-0.125957	0.00222428	64333
ARHGAP9	FH535	0.12703	0.00218473	64333
ARHGAP9	FK866	-0.339031	3.51099e-24	64333
ARHGAP9	FMK	-0.167024	0.000274397	64333
ARHGAP9	FR-180204	-0.16096	6.808e-05	64333
ARHGAP9	FTI-277	0.163983	2.1555e-05	64333
ARHGAP9	Foretinib	-0.236161	4.50789e-11	64333
ARHGAP9	GDC0449	-0.0131865	0.920899	64333
ARHGAP9	GDC0941	-0.074808	0.126224	64333
ARHGAP9	GNF-2	0.0287055	0.92025	64333
ARHGAP9	GSK-650394	-0.0470148	0.50381	64333
ARHGAP9	GSK1070916	-0.38871	4.85418e-32	64333
ARHGAP9	GSK1904529A	0.19013	2.71737e-06	64333
ARHGAP9	GSK2126458	-0.311639	2.86712e-20	64333
ARHGAP9	GSK269962A	-0.0803458	0.0726182	64333
ARHGAP9	GSK429286A	-0.256279	1.0942e-12	64333
ARHGAP9	GSK690693	-0.309396	3.56823e-20	64333
ARHGAP9	GW 441756	0.0441513	0.804681	64333
ARHGAP9	GW-2580	-0.0540791	0.796719	64333
ARHGAP9	GW843682X	-0.148214	0.0444421	64333
ARHGAP9	Gefitinib	0.163321	1.8287e-05	64333
ARHGAP9	Gemcitabine	-0.12217	0.00425772	64333
ARHGAP9	Genentech Cpd 10	-0.340099	1.27741e-24	64333
ARHGAP9	HG-5-113-01	-0.149423	0.0137063	64333
ARHGAP9	HG-5-88-01	-0.0559747	0.69233	64333
ARHGAP9	HG-6-64-1	-0.140551	0.000459759	64333
ARHGAP9	I-BET-762	-0.528117	9.38385e-66	64333
ARHGAP9	IOX2	0.115974	0.0197844	64333
ARHGAP9	IPA-3	-0.276867	1.09817e-14	64333
ARHGAP9	Imatinib	-0.0903542	0.442072	64333
ARHGAP9	Ispinesib Mesylate	-0.309613	3.32373e-20	64333
ARHGAP9	JNJ-26854165	0.0215295	0.713976	64333
ARHGAP9	JNK Inhibitor VIII	0.216754	1.8514e-08	64333
ARHGAP9	JNK-9L	-0.0792468	0.111167	64333
ARHGAP9	JQ1	-0.219635	2.78788e-09	64333
ARHGAP9	JQ12	-0.166606	0.000165847	64333
ARHGAP9	JW-7-24-1	-0.393592	5.1658e-34	64333
ARHGAP9	JW-7-52-1	-0.0492993	0.643508	64333
ARHGAP9	KIN001-055	-0.0455121	0.458401	64333
ARHGAP9	KIN001-102	-0.402401	1.06862e-35	64333
ARHGAP9	KIN001-135	0.104871	0.244523	64333
ARHGAP9	KIN001-236	-0.349448	5.74517e-26	64333
ARHGAP9	KIN001-244	-0.358001	2.60382e-27	64333
ARHGAP9	KIN001-260	-0.353921	6.98358e-27	64333
ARHGAP9	KIN001-266	-0.123691	0.003529	64333
ARHGAP9	KIN001-270	-0.20819	7.89343e-09	64333
ARHGAP9	KU-55933	-0.0606137	0.276186	64333
ARHGAP9	LAQ824	-0.278148	1.01219e-14	64333
ARHGAP9	LFM-A13	0.108882	0.0159485	64333
ARHGAP9	LY317615	-0.206321	3.08678e-08	64333
ARHGAP9	Lapatinib	0.219345	0.000138606	64333
ARHGAP9	Lenalidomide	-0.0381022	0.626055	64333
ARHGAP9	Linifanib	-0.262762	7.54809e-14	64333
ARHGAP9	Lisitinib	0.017366	0.827931	64333
ARHGAP9	MG-132	0.0221898	0.847521	64333
ARHGAP9	MK-2206	-0.115452	0.0112071	64333
ARHGAP9	MLN4924	0.0290628	0.638097	64333
ARHGAP9	MP470	-0.122849	0.00314642	64333
ARHGAP9	MPS-1-IN-1	-0.224777	1.65638e-10	64333
ARHGAP9	MS-275	-0.140609	0.0472373	64333
ARHGAP9	Masitinib	-0.314477	1.1844e-20	64333
ARHGAP9	Methotrexate	-0.435316	3.67279e-39	64333
ARHGAP9	Midostaurin	0.0124995	0.812672	64333
ARHGAP9	Mitomycin C	-0.13392	0.00190355	64333
ARHGAP9	NG-25	-0.408004	1.17662e-36	64333
ARHGAP9	NPK76-II-72-1	-0.444565	1.56604e-44	64333
ARHGAP9	NSC-207895	-0.108895	0.00680071	64333
ARHGAP9	NSC-87877	0.141688	0.00566047	64333
ARHGAP9	NU-7441	-0.0105198	0.919257	64333
ARHGAP9	Navitoclax	-0.395224	1.17685e-31	64333
ARHGAP9	Nilotinib	-0.169839	3.6102e-05	64333
ARHGAP9	Nutlin-3a (-)	-0.117655	0.00497509	64333
ARHGAP9	OSI-027	-0.355097	5.81926e-27	64333
ARHGAP9	OSI-930	-0.354292	3.73578e-26	64333
ARHGAP9	OSU-03012	-0.112204	0.00930726	64333
ARHGAP9	Obatoclax Mesylate	-0.136836	0.000794648	64333
ARHGAP9	Olaparib	0.0496953	0.258981	64333
ARHGAP9	PAC-1	-0.25515	3.68759e-12	64333
ARHGAP9	PD-0325901	0.120152	0.00169821	64333
ARHGAP9	PD-0332991	-0.0684091	0.178852	64333
ARHGAP9	PD-173074	-0.0276929	0.871207	64333
ARHGAP9	PF-4708671	0.0531702	0.557382	64333
ARHGAP9	PF-562271	0.0403428	0.480553	64333
ARHGAP9	PFI-1	-0.179997	5.3653e-06	64333
ARHGAP9	PHA-665752	0.0850953	0.532392	64333
ARHGAP9	PHA-793887	-0.40808	6.15463e-37	64333
ARHGAP9	PI-103	-0.345937	1.69823e-25	64333
ARHGAP9	PIK-93	-0.459917	6.37599e-48	64333
ARHGAP9	PLX4720	0.0715315	0.0760584	64333
ARHGAP9	Paclitaxel	-0.0324355	0.80234	64333
ARHGAP9	Parthenolide	-0.0872333	0.361194	64333
ARHGAP9	Pazopanib	0.0291949	0.626502	64333
ARHGAP9	Phenformin	-0.30352	5.86872e-19	64333
ARHGAP9	Pyrimethamine	-0.0446461	0.714086	64333
ARHGAP9	QL-VIII-58	-0.0687647	0.349421	64333
ARHGAP9	QL-X-138	-0.334179	1.54958e-23	64333
ARHGAP9	QL-XI-92	-0.37845	4.2208e-31	64333
ARHGAP9	QL-XII-47	-0.234669	6.74061e-11	64333
ARHGAP9	QL-XII-61	-0.307942	2.42237e-09	64333
ARHGAP9	QS11	-0.0542993	0.363758	64333
ARHGAP9	RDEA119	0.105863	0.00306436	64333
ARHGAP9	RO-3306	0.17892	5.19048e-06	64333
ARHGAP9	Rapamycin	-0.0387969	0.776598	64333
ARHGAP9	Roscovitine	0.000507914	0.999294	64333
ARHGAP9	Ruxolitinib	-0.161213	4.0637e-05	64333
ARHGAP9	S-Trityl-L-cysteine	-0.189539	0.00656085	64333
ARHGAP9	SB 216763	0.156992	0.000435319	64333
ARHGAP9	SB 505124	0.0935656	0.114879	64333
ARHGAP9	SB52334	0.0457909	0.337994	64333
ARHGAP9	SB590885	0.0758734	0.105053	64333
ARHGAP9	SGC0946	0.151778	0.000519889	64333
ARHGAP9	SL 0101-1	0.0852748	0.245244	64333
ARHGAP9	SN-38	-0.131325	0.000653674	64333
ARHGAP9	SNX-2112	-0.39217	3.12027e-33	64333
ARHGAP9	STF-62247	-0.265321	7.91225e-14	64333
ARHGAP9	Salubrinal	-0.117023	0.129781	64333
ARHGAP9	Saracatinib	0.0552266	0.521957	64333
ARHGAP9	Shikonin	-0.126639	0.00436004	64333
ARHGAP9	Sorafenib	-0.188437	0.00775166	64333
ARHGAP9	Sunitinib	-0.259872	1.0604e-05	64333
ARHGAP9	T0901317	-0.231063	1.29258e-10	64333
ARHGAP9	TAE684	0.0548184	0.632666	64333
ARHGAP9	TAK-715	-0.324599	2.48314e-22	64333
ARHGAP9	TG101348	-0.445835	1.10354e-44	64333
ARHGAP9	TGX221	0.142851	0.0190545	64333
ARHGAP9	THZ-2-102-1	-0.385535	9.11522e-32	64333
ARHGAP9	THZ-2-49	-0.344148	6.64388e-25	64333
ARHGAP9	TL-1-85	-0.40588	3.3421e-36	64333
ARHGAP9	TL-2-105	-0.304494	2.52357e-19	64333
ARHGAP9	TPCA-1	-0.446611	7.34848e-45	64333
ARHGAP9	TW 37	0.0220579	0.67603	64333
ARHGAP9	Talazoparib	-0.00496396	0.931319	64333
ARHGAP9	Tamoxifen	-0.0139051	0.930239	64333
ARHGAP9	Temozolomide	-0.0515902	0.444555	64333
ARHGAP9	Temsirolimus	-0.0560249	0.24587	64333
ARHGAP9	Thapsigargin	0.059481	0.305714	64333
ARHGAP9	Tipifarnib	-0.0585807	0.33088	64333
ARHGAP9	Tivozanib	-0.179243	6.40491e-06	64333
ARHGAP9	Trametinib	0.170542	1.39834e-06	64333
ARHGAP9	Tubastatin A	-0.405499	4.32245e-36	64333
ARHGAP9	UNC0638	-0.328386	2.53439e-24	64333
ARHGAP9	UNC1215	0.114979	0.00975417	64333
ARHGAP9	VNLG/124	-0.298346	2.67515e-18	64333
ARHGAP9	VX-11e	-0.123268	0.0025504	64333
ARHGAP9	VX-680	-0.174767	0.0203106	64333
ARHGAP9	VX-702	-0.047512	0.803287	64333
ARHGAP9	Veliparib	0.0756372	0.225142	64333
ARHGAP9	Vinblastine	-0.130159	0.00109755	64333
ARHGAP9	Vinorelbine	-0.0543284	0.305083	64333
ARHGAP9	Vorinostat	-0.400072	1.3613e-32	64333
ARHGAP9	WH-4-023	0.0690307	0.375381	64333
ARHGAP9	WZ-1-84	0.0803339	0.292593	64333
ARHGAP9	WZ3105	-0.375059	1.20845e-30	64333
ARHGAP9	XAV939	0.198609	4.50897e-08	64333
ARHGAP9	XL-184	-0.2356	6.56801e-11	64333
ARHGAP9	XMD11-85h	-0.131918	0.214384	64333
ARHGAP9	XMD13-2	-0.330331	2.05073e-23	64333
ARHGAP9	XMD14-99	-0.25317	3.21375e-13	64333
ARHGAP9	XMD15-27	-0.160918	4.4396e-05	64333
ARHGAP9	XMD8-85	-0.146654	0.0345999	64333
ARHGAP9	XMD8-92	-0.139379	0.0824492	64333
ARHGAP9	Y-39983	-0.336454	8.89807e-24	64333
ARHGAP9	YK 4-279	-0.0324688	0.577171	64333
ARHGAP9	YM155	-0.1184	0.00627433	64333
ARHGAP9	YM201636	-0.271326	2.09214e-15	64333
ARHGAP9	Z-LLNle-CHO	-0.158128	0.0131224	64333
ARHGAP9	ZG-10	-0.205811	0.000215757	64333
ARHGAP9	ZM-447439	-0.210361	1.19154e-07	64333
ARHGAP9	ZSTK474	-0.359315	9.41301e-28	64333
ARHGAP9	Zibotentan	0.0331224	0.906877	64333
ARHGAP9	piperlongumine	0.0434128	0.331239	64333
ARHGAP9	rTRAIL	0.0416967	0.57349	64333
ARHGAP9	selumetinib	0.115028	0.00127105	64333
